# Supplementary material for: Circulating hsa-miR-320a and its regulatory network in type 1 diabetes mellitus
Source: Front Immunol. 2024 Oct 11;15:1376416. doi: 10.3389/fimmu.2024.1376416 (PMC11502356; doi:10.3389/fimmu.2024.1376416)
Supplement: Supplementary file 5 [file Table4.xlsx]

## Sheet: KEGG pathways
Supplementary Table S4:	Functional enrichment of KEGG pathways
microRNA	KEGG ID	Description	p-value	FDR	Genes	Count
hsa-miR-34a-5p	hsa05221	Acute myeloid leukemia	1.5096e-06	4.3908e-06	MYC/CCND1/MAP2K1/SPI1/CSF1R/KIT/TCF7/AKT1	8
hsa-miR-874-3p	hsa05221	Acute myeloid leukemia	0.0478936	0.078816	STAT3	1
hsa-miR-34a-5p	hsa04520	Adherens junction	0.00023387	0.000516975	MET/SNAI1/SRC/SMAD4/TCF7/ERBB2	6
hsa-miR-34a-5p	hsa04920	Adipocytokine signaling pathway	0.0104001	0.0143685	ACSL4/ACSL1/PPARA/AKT1	4
hsa-miR-874-3p	hsa04920	Adipocytokine signaling pathway	0.0492934	0.078816	STAT3	1
hsa-miR-103a-3p	hsa04261	Adrenergic signaling in cardiomyocytes	0.0734719	0.143949	CREB1/CACNA1C	2
hsa-miR-34a-5p	hsa04261	Adrenergic signaling in cardiomyocytes	0.0120369	0.0162243	BCL2/CACNB3/PIK3CG/AKT1/AGTR1/PPP1CC	6
hsa-miR-34a-5p	hsa04933	AGE-RAGE signaling pathway in diabetic complications	3.62309e-06	1.00112e-05	CDK4/CCND1/BCL2/VEGFA/SMAD4/CYBB/BAX/AKT1/AGTR1	9
hsa-miR-874-3p	hsa04933	AGE-RAGE signaling pathway in diabetic complications	0.0707708	0.083132	STAT3	1
hsa-miR-34a-5p	hsa04936	Alcoholic liver disease	0.00825686	0.012168	CCND1/SIRT1/IFNB1/TCF7/PPARA/AKT1	6
hsa-miR-501-5p	hsa04936	Alcoholic liver disease	0.0672859	0.066262	GSK3B	1
hsa-miR-103a-3p	hsa05034	Alcoholism	0.424547	0.32611	CREB1	1
hsa-miR-34a-5p	hsa05034	Alcoholism	0.410308	0.271556	MAP2K1/HDAC1/PPP1CC	3
hsa-miR-874-3p	hsa05034	Alcoholism	0.128898	0.0973697	HDAC1	1
hsa-miR-103a-3p	hsa04925	Aldosterone synthesis and secretion	0.0327002	0.0844886	CREB1/CACNA1C	2
hsa-miR-34a-5p	hsa04925	Aldosterone synthesis and secretion	0.121656	0.108437	PRKD1/NR4A2/AGTR1	3
hsa-miR-103a-3p	hsa05010	Alzheimer disease	0.0990115	0.172286	ADAM10/DVL1/CACNA1C	3
hsa-miR-34a-5p	hsa05010	Alzheimer disease	0.340804	0.232517	WNT1/AXIN2/MAP2K1/CYBB/BECN1/AKT1	6
hsa-miR-501-5p	hsa05010	Alzheimer disease	0.0122458	0.066262	DKK1/GSK3B	2
hsa-miR-103a-3p	hsa05031	Amphetamine addiction	0.0169878	0.0599299	CREB1/CACNA1C	2
hsa-miR-34a-5p	hsa05031	Amphetamine addiction	0.00159181	0.00293227	SIRT1/STX1A/HDAC1/FOS/PPP1CC	5
hsa-miR-874-3p	hsa05031	Amphetamine addiction	0.0492934	0.078816	HDAC1	1
hsa-miR-103a-3p	hsa04152	AMPK signaling pathway	0.299603	0.258031	CREB1	1
hsa-miR-139-3p	hsa04152	AMPK signaling pathway	0.0292008		ELAVL1	1
hsa-miR-34a-5p	hsa04152	AMPK signaling pathway	0.063092	0.0651713	CCND1/SIRT1/HNF4A/AKT1	4
hsa-miR-34a-5p	hsa05014	Amyotrophic lateral sclerosis	0.667208	0.382761	BCL2/TP53/BAX/BECN1	4
hsa-miR-103a-3p	hsa04612	Antigen processing and presentation	0.204632	0.215211	CREB1	1
hsa-miR-103a-3p	hsa04371	Apelin signaling pathway	0.336042	0.272876	MEF2D	1
hsa-miR-34a-5p	hsa04371	Apelin signaling pathway	0.000312926	0.000652576	JAG1/CCND1/MAP2K1/SMAD4/BECN1/PIK3CG/AKT1/AGTR1	8
hsa-miR-34a-5p	hsa04210	Apoptosis	0.00144738	0.00271141	BCL2/MAP2K1/TP53/BIRC5/BAX/AKT1/FOS	7
hsa-miR-34a-5p	hsa04215	Apoptosis - multiple species	0.000613367	0.00125087	BCL2/BIRC5/BAX/BECN1	4
hsa-miR-103a-3p	hsa00590	Arachidonic acid metabolism	0.163781	0.214838	CYP2C8	1
hsa-miR-103a-3p	hsa05412	Arrhythmogenic right ventricular cardiomyopathy	0.202283	0.215211	CACNA1C	1
hsa-miR-34a-5p	hsa05412	Arrhythmogenic right ventricular cardiomyopathy	0.247355	0.181055	TCF7/CACNB3	2
hsa-miR-103a-3p	hsa04140	Autophagy - animal	0.00766293	0.042234	DAPK1/PTEN/BNIP3	3
hsa-miR-34a-5p	hsa04140	Autophagy - animal	1.19183e-06	3.56023e-06	BCL2/MAP2K1/ATG4A/ATG4B/ATG4C/ATG4D/ATG5/ATG7/BECN1/AKT1/HMGB1	11
hsa-miR-34a-5p	hsa04136	Autophagy - other	9.55127e-08	3.51889e-07	ATG4A/ATG4B/ATG4C/ATG4D/ATG5/ATG7/BECN1	7
hsa-miR-34a-5p	hsa04360	Axon guidance	0.0752998	0.0736514	MET/EPHA5/BMP7/SRC/L1CAM	5
hsa-miR-501-5p	hsa04360	Axon guidance	0.0856109	0.0718876	GSK3B	1
hsa-miR-34a-5p	hsa04662	B cell receptor signaling pathway	0.0859778	0.0812206	MAP2K1/AKT1/FOS	3
hsa-miR-501-5p	hsa04662	B cell receptor signaling pathway	0.0402271	0.066262	GSK3B	1
hsa-miR-103a-3p	hsa05100	Bacterial invasion of epithelial cells	0.202283	0.215211	CAV1	1
hsa-miR-34a-5p	hsa05100	Bacterial invasion of epithelial cells	0.247355	0.181055	MET/SRC	2
hsa-miR-103a-3p	hsa05217	Basal cell carcinoma	0.168689	0.215211	DVL1	1
hsa-miR-34a-5p	hsa05217	Basal cell carcinoma	0.00105559	0.00204685	WNT1/AXIN2/TP53/TCF7/BAX	5
hsa-miR-501-5p	hsa05217	Basal cell carcinoma	0.0302863	0.066262	GSK3B	1
hsa-miR-34a-5p	hsa03410	Base excision repair	0.338011	0.232517	HMGB1	1
hsa-miR-103a-3p	hsa05219	Bladder cancer	0.113145	0.185521	DAPK1	1
hsa-miR-34a-5p	hsa05219	Bladder cancer	1.42487e-12	2.62476e-11	MYC/CDK4/CCND1/E2F3/MAP2K1/VEGFA/E2F1/TP53/CDKN2A/SRC/ERBB2	11
hsa-miR-874-3p	hsa05219	Bladder cancer	0.0295403	0.0777377	E2F3	1
hsa-miR-103a-3p	hsa05224	Breast cancer	0.00859216	0.042234	PTEN/CDK6/DVL1	3
hsa-miR-34a-5p	hsa05224	Breast cancer	7.12668e-16	7.87686e-14	JAG1/MYC/CDK4/CDK6/CCND1/WNT1/AXIN2/E2F3/DLL1/NOTCH1/MAP2K1/E2F1/NOTCH2/TP53/KIT/TCF7/BAX/ERBB2/AKT1/FOS	20
hsa-miR-501-5p	hsa05224	Breast cancer	0.0695915	0.066262	GSK3B	1
hsa-miR-874-3p	hsa05224	Breast cancer	0.102561	0.0904933	E2F3	1
hsa-miR-103a-3p	hsa04020	Calcium signaling pathway	0.509122	0.374218	CACNA1C	1
hsa-miR-34a-5p	hsa04020	Calcium signaling pathway	0.0772437	0.07489	MET/VEGFA/PDGFRA/PDGFRB/ERBB2/AGTR1	6
hsa-miR-103a-3p	hsa04024	cAMP signaling pathway	0.138939	0.200786	CREB1/CACNA1C	2
hsa-miR-34a-5p	hsa04024	cAMP signaling pathway	0.146878	0.124876	MAP2K1/PPARA/AKT1/FOS/PPP1CC	5
hsa-miR-34a-5p	hsa04973	Carbohydrate digestion and absorption	0.444571	0.285679	AKT1	1
hsa-miR-103a-3p	hsa04260	Cardiac muscle contraction	0.225478	0.225085	CACNA1C	1
hsa-miR-34a-5p	hsa04260	Cardiac muscle contraction	0.664165	0.382761	CACNB3	1
hsa-miR-34a-5p	hsa04514	Cell adhesion molecules	0.861601	0.457834	L1CAM	1
hsa-miR-103a-3p	hsa04110	Cell cycle	0.00573741	0.0407658	CCNE1/CDK2/CDK6	3
hsa-miR-34a-5p	hsa04110	Cell cycle	4.44757e-09	2.45787e-08	MYC/CDK4/CCNE2/CCND3/CDC25A/CDK6/CCND1/E2F3/E2F1/TP53/CDKN2A/HDAC1/SMAD4	13
hsa-miR-501-5p	hsa04110	Cell cycle	0.0603435	0.066262	GSK3B	1
hsa-miR-874-3p	hsa04110	Cell cycle	0.00340547	0.0179235	HDAC1/E2F3	2
hsa-miR-103a-3p	hsa04218	Cellular senescence	0.000983222	0.0104791	CCNE1/CDK2/PTEN/CDK6	4
hsa-miR-34a-5p	hsa04218	Cellular senescence	6.31245e-10	4.10407e-09	MYC/CDK4/CCNE2/CCND3/CDC25A/CDK6/CCND1/E2F3/SIRT1/MAP2K1/E2F1/TP53/CDKN2A/AKT1/PPP1CC	15
hsa-miR-874-3p	hsa04218	Cellular senescence	0.108544	0.0904933	E2F3	1
hsa-miR-103a-3p	hsa05230	Central carbon metabolism in cancer	0.185652	0.215211	PTEN	1
hsa-miR-34a-5p	hsa05230	Central carbon metabolism in cancer	1.17442e-08	5.64366e-08	MYC/MET/MAP2K1/PDGFRA/TP53/LDHA/PDGFRB/KIT/ERBB2/AKT1	10
hsa-miR-103a-3p	hsa04022	cGMP-PKG signaling pathway	0.0121568	0.0501604	CREB1/MEF2D/CACNA1C	3
hsa-miR-34a-5p	hsa04022	cGMP-PKG signaling pathway	0.0561719	0.0591284	MAP2K1/PIK3CG/AKT1/AGTR1/PPP1CC	5
hsa-miR-34a-5p	hsa05142	Chagas disease	0.132716	0.114598	IFNB1/AKT1/FOS	3
hsa-miR-103a-3p	hsa05204	Chemical carcinogenesis - DNA adducts	0.183249	0.215211	CYP2C8	1
hsa-miR-103a-3p	hsa05208	Chemical carcinogenesis - reactive oxygen species	0.483385	0.361534	PTEN	1
hsa-miR-34a-5p	hsa05208	Chemical carcinogenesis - reactive oxygen species	0.0205467	0.0261029	MET/MAP2K1/VEGFA/SRC/AKT1/FOS/PRKD1	7
hsa-miR-103a-3p	hsa05207	Chemical carcinogenesis - receptor activation	0.0229174	0.0651337	CREB1/KLF4/CACNA1C	3
hsa-miR-34a-5p	hsa05207	Chemical carcinogenesis - receptor activation	8.82078e-13	1.94986e-11	JAG1/MYC/CCND3/CDC25A/CCND1/WNT1/DLL1/BCL2/MAP2K1/VEGFA/E2F1/NOTCH2/AR/BIRC5/SRC/KLF4/PPARA/AKT1/FOS/AIP	20
hsa-miR-874-3p	hsa05207	Chemical carcinogenesis - receptor activation	0.145029	0.102149	STAT3	1
hsa-miR-34a-5p	hsa04062	Chemokine signaling pathway	0.0897965	0.0836916	MAP2K1/CCL22/SRC/PIK3CG/AKT1	5
hsa-miR-501-5p	hsa04062	Chemokine signaling pathway	0.0901497	0.0718876	GSK3B	1
hsa-miR-874-3p	hsa04062	Chemokine signaling pathway	0.132145	0.0973697	STAT3	1
hsa-miR-34a-5p	hsa05231	Choline metabolism in cancer	0.00725635	0.0109865	MAP2K1/PDGFRA/PDGFRB/AKT1/FOS	5
hsa-miR-103a-3p	hsa04725	Cholinergic synapse	0.0424025	0.0982085	CREB1/CACNA1C	2
hsa-miR-34a-5p	hsa04725	Cholinergic synapse	0.012974	0.0172768	BCL2/MAP2K1/PIK3CG/AKT1/FOS	5
hsa-miR-103a-3p	hsa05220	Chronic myeloid leukemia	0.199927	0.215211	CDK6	1
hsa-miR-34a-5p	hsa05220	Chronic myeloid leukemia	5.99692e-12	8.28522e-11	MYC/CDK4/CDK6/CCND1/E2F3/MAP2K1/E2F1/TP53/CDKN2A/HDAC1/SMAD4/BAX/AKT1	13
hsa-miR-874-3p	hsa05220	Chronic myeloid leukemia	0.00123338	0.00757336	HDAC1/E2F3	2
hsa-miR-103a-3p	hsa04713	Circadian entrainment	0.0320893	0.0844886	CREB1/CACNA1C	2
hsa-miR-34a-5p	hsa04713	Circadian entrainment	0.703973	0.389038	FOS	1
hsa-miR-103a-3p	hsa04710	Circadian rhythm	0.0947378	0.168284	CREB1	1
hsa-miR-103a-3p	hsa05030	Cocaine addiction	0.133742	0.200058	CREB1	1
hsa-miR-34a-5p	hsa05210	Colorectal cancer	4.88354e-10	3.37349e-09	MYC/CCND1/AXIN2/BCL2/MAP2K1/TP53/BIRC5/SMAD4/TCF7/BAX/AKT1/FOS	12
hsa-miR-501-5p	hsa05210	Colorectal cancer	0.0411698	0.066262	GSK3B	1
hsa-miR-34a-5p	hsa05171	Coronavirus disease - COVID-19	0.160638	0.130527	IFNB1/CYBB/IL6R/FOS/AGTR1	5
hsa-miR-874-3p	hsa05171	Coronavirus disease - COVID-19	0.157754	0.105673	STAT3	1
hsa-miR-103a-3p	hsa04927	Cortisol synthesis and secretion	0.0151686	0.0587873	CREB1/CACNA1C	2
hsa-miR-34a-5p	hsa04927	Cortisol synthesis and secretion	0.556967	0.338239	AGTR1	1
hsa-miR-34a-5p	hsa04625	C-type lectin receptor signaling pathway	0.138374	0.118558	CCL22/SRC/AKT1	3
hsa-miR-103a-3p	hsa04934	Cushing syndrome	4.12738e-06	0.000175957	CCNE1/CDK2/CREB1/CDK6/DVL1/CACNA1C	6
hsa-miR-34a-5p	hsa04934	Cushing syndrome	5.01645e-08	1.9119e-07	CDK4/CCNE2/CDK6/CCND1/WNT1/AXIN2/E2F3/MAP2K1/E2F1/CDKN2A/TCF7/AIP/AGTR1	13
hsa-miR-501-5p	hsa04934	Cushing syndrome	0.0732715	0.066262	GSK3B	1
hsa-miR-874-3p	hsa04934	Cushing syndrome	0.107881	0.0904933	E2F3	1
hsa-miR-34a-5p	hsa00270	Cysteine and methionine metabolism	0.471765	0.297957	LDHA	1
hsa-miR-34a-5p	hsa04060	Cytokine-cytokine receptor interaction	0.0731933	0.0722303	IFNB1/CCL22/BMP7/INHBB/CSF1R/IL6R/GDF5	7
hsa-miR-34a-5p	hsa04623	Cytosolic DNA-sensing pathway	0.609348	0.364049	IFNB1	1
hsa-miR-103a-3p	hsa05415	Diabetic cardiomyopathy	0.451449	0.343678	PTEN	1
hsa-miR-34a-5p	hsa05415	Diabetic cardiomyopathy	0.107301	0.0972098	CYBB/PPARA/AKT1/AGTR1/PPP1CC	5
hsa-miR-501-5p	hsa05415	Diabetic cardiomyopathy	0.0951227	0.0718876	GSK3B	1
hsa-miR-103a-3p	hsa05414	Dilated cardiomyopathy	0.2458	0.231457	CACNA1C	1
hsa-miR-34a-5p	hsa05414	Dilated cardiomyopathy	0.700212	0.389038	CACNB3	1
hsa-miR-103a-3p	hsa04728	Dopaminergic synapse	0.0560355	0.116531	CREB1/CACNA1C	2
hsa-miR-34a-5p	hsa04728	Dopaminergic synapse	0.224729	0.1713	AKT1/FOS/PPP1CC	3
hsa-miR-501-5p	hsa04728	Dopaminergic synapse	0.0626619	0.066262	GSK3B	1
hsa-miR-103a-3p	hsa00982	Drug metabolism - cytochrome P450	0.190438	0.215211	CYP2C8	1
hsa-miR-34a-5p	hsa00983	Drug metabolism - other enzymes	0.633189	0.372256	IMPDH2	1
hsa-miR-34a-5p	hsa04512	ECM-receptor interaction	0.668373	0.382761	CD44	1
hsa-miR-103a-3p	hsa01521	EGFR tyrosine kinase inhibitor resistance	0.206975	0.215211	PTEN	1
hsa-miR-34a-5p	hsa01521	EGFR tyrosine kinase inhibitor resistance	1.75662e-10	1.36371e-09	MET/BCL2/MAP2K1/VEGFA/PDGFRA/AXL/PDGFRB/SRC/IL6R/BAX/ERBB2/AKT1	12
hsa-miR-501-5p	hsa01521	EGFR tyrosine kinase inhibitor resistance	0.0378672	0.066262	GSK3B	1
hsa-miR-874-3p	hsa01521	EGFR tyrosine kinase inhibitor resistance	0.0562663	0.0797296	STAT3	1
hsa-miR-34a-5p	hsa01522	Endocrine resistance	1.96995e-15	1.08866e-13	JAG1/CDK4/CCND1/E2F3/DLL1/BCL2/NOTCH1/MAP2K1/E2F1/NOTCH2/TP53/CDKN2A/SRC/BAX/ERBB2/AKT1/FOS	17
hsa-miR-874-3p	hsa01522	Endocrine resistance	0.0693975	0.083132	E2F3	1
hsa-miR-103a-3p	hsa04144	Endocytosis	0.525115	0.379432	CAV1	1
hsa-miR-34a-5p	hsa04144	Endocytosis	0.823267	0.443866	PDGFRA/SRC	2
hsa-miR-103a-3p	hsa05213	Endometrial cancer	0.156366	0.214838	PTEN	1
hsa-miR-34a-5p	hsa05213	Endometrial cancer	3.11773e-08	1.23068e-07	MYC/CCND1/AXIN2/MAP2K1/TP53/TCF7/BAX/ERBB2/AKT1	9
hsa-miR-501-5p	hsa05213	Endometrial cancer	0.0279081	0.066262	GSK3B	1
hsa-miR-103a-3p	hsa05120	Epithelial cell signaling in Helicobacter pylori infection	0.185652	0.215211	ADAM10	1
hsa-miR-34a-5p	hsa05120	Epithelial cell signaling in Helicobacter pylori infection	0.21525	0.167541	MET/SRC	2
hsa-miR-103a-3p	hsa05169	Epstein-Barr virus infection	0.0201912	0.0599299	CCNE1/CDK2/CDK6	3
hsa-miR-34a-5p	hsa05169	Epstein-Barr virus infection	2.25069e-08	9.21333e-08	MYC/CDK4/CCNE2/CCND3/CDK6/CCND1/E2F3/BCL2/IFNB1/E2F1/CD44/TP53/HDAC1/BAX/AKT1	15
hsa-miR-874-3p	hsa05169	Epstein-Barr virus infection	0.000276189	0.00757336	HDAC1/STAT3/E2F3	3
hsa-miR-34a-5p	hsa04012	ErbB signaling pathway	0.0039759	0.00665821	MYC/MAP2K1/SRC/ERBB2/AKT1	5
hsa-miR-501-5p	hsa04012	ErbB signaling pathway	0.0406986	0.066262	GSK3B	1
hsa-miR-103a-3p	hsa04915	Estrogen signaling pathway	0.334066	0.272876	CREB1	1
hsa-miR-34a-5p	hsa04915	Estrogen signaling pathway	0.0281742	0.0334837	BCL2/MAP2K1/SRC/AKT1/FOS	5
hsa-miR-103a-3p	hsa03460	Fanconi anemia pathway	0.146382	0.208016	RAD51	1
hsa-miR-34a-5p	hsa03460	Fanconi anemia pathway	0.491292	0.308527	RAD51	1
hsa-miR-34a-5p	hsa00061	Fatty acid biosynthesis	0.0204659	0.0261029	ACSL4/ACSL1	2
hsa-miR-34a-5p	hsa00071	Fatty acid degradation	0.0990949	0.0905173	ACSL4/ACSL1	2
hsa-miR-34a-5p	hsa01212	Fatty acid metabolism	0.157116	0.12998	ACSL4/ACSL1	2
hsa-miR-34a-5p	hsa04664	Fc epsilon RI signaling pathway	0.206148	0.161594	MAP2K1/AKT1	2
hsa-miR-34a-5p	hsa04666	Fc gamma R-mediated phagocytosis	0.339184	0.232517	MAP2K1/AKT1	2
hsa-miR-34a-5p	hsa04216	Ferroptosis	5.82292e-07	1.83882e-06	TP53/ACSL4/ACSL1/PCBP2/CYBB/ATG5/ATG7	7
hsa-miR-103a-3p	hsa05418	Fluid shear stress and atherosclerosis	0.336042	0.272876	CAV1	1
hsa-miR-34a-5p	hsa05418	Fluid shear stress and atherosclerosis	0.00746475	0.0111493	BCL2/VEGFA/TP53/SRC/AKT1/FOS	6
hsa-miR-103a-3p	hsa04510	Focal adhesion	0.117424	0.18746	CAV1/PTEN	2
hsa-miR-34a-5p	hsa04510	Focal adhesion	7.08645e-06	1.86485e-05	MET/CCND3/CCND1/BCL2/MAP2K1/VEGFA/PDGFRA/PDGFRB/SRC/ERBB2/AKT1/PPP1CC	12
hsa-miR-501-5p	hsa04510	Focal adhesion	0.0951227	0.0718876	GSK3B	1
hsa-miR-103a-3p	hsa04068	FoxO signaling pathway	0.00625348	0.0410147	CDK2/PTEN/BNIP3	3
hsa-miR-34a-5p	hsa04068	FoxO signaling pathway	0.0231334	0.0287286	CCND1/SIRT1/MAP2K1/SMAD4/AKT1	5
hsa-miR-874-3p	hsa04068	FoxO signaling pathway	0.0918425	0.0890439	STAT3	1
hsa-miR-103a-3p	hsa04727	GABAergic synapse	0.230039	0.225085	CACNA1C	1
hsa-miR-34a-5p	hsa04727	GABAergic synapse	0.672529	0.383156	SRC	1
hsa-miR-34a-5p	hsa04540	Gap junction	0.023492	0.0288498	MAP2K1/PDGFRA/PDGFRB/SRC	4
hsa-miR-103a-3p	hsa05226	Gastric cancer	0.00891608	0.042234	CCNE1/CDK2/DVL1	3
hsa-miR-34a-5p	hsa05226	Gastric cancer	2.97633e-11	3.28962e-10	MYC/MET/CCNE2/CCND1/WNT1/AXIN2/E2F3/BCL2/MAP2K1/E2F1/TP53/SMAD4/TCF7/BAX/ERBB2/AKT1	16
hsa-miR-501-5p	hsa05226	Gastric cancer	0.0705125	0.066262	GSK3B	1
hsa-miR-874-3p	hsa05226	Gastric cancer	0.103894	0.0904933	E2F3	1
hsa-miR-103a-3p	hsa05214	Glioma	0.0198823	0.0599299	PTEN/CDK6	2
hsa-miR-34a-5p	hsa05214	Glioma	9.33422e-11	8.59731e-10	CDK4/CDK6/CCND1/E2F3/MAP2K1/E2F1/PDGFRA/TP53/CDKN2A/PDGFRB/BAX/AKT1	12
hsa-miR-874-3p	hsa05214	Glioma	0.0534823	0.078816	E2F3	1
hsa-miR-103a-3p	hsa04922	Glucagon signaling pathway	0.269944	0.242276	CREB1	1
hsa-miR-34a-5p	hsa04922	Glucagon signaling pathway	0.0435956	0.0472398	SIRT1/LDHA/PPARA/AKT1	4
hsa-miR-103a-3p	hsa04724	Glutamatergic synapse	0.28492	0.250446	CACNA1C	1
hsa-miR-103a-3p	hsa00564	Glycerophospholipid metabolism	0.252459	0.231457	GPD1	1
hsa-miR-34a-5p	hsa00010	Glycolysis / Gluconeogenesis	0.567972	0.343037	LDHA	1
hsa-miR-34a-5p	hsa00533	Glycosaminoglycan biosynthesis - keratan sulfate	0.160374	0.130527	FUT8	1
hsa-miR-103a-3p	hsa04929	GnRH secretion	0.171133	0.215211	CACNA1C	1
hsa-miR-34a-5p	hsa04929	GnRH secretion	0.188087	0.149558	MAP2K1/AKT1	2
hsa-miR-103a-3p	hsa04912	GnRH signaling pathway	0.239083	0.229045	CACNA1C	1
hsa-miR-34a-5p	hsa04912	GnRH signaling pathway	0.32097	0.225959	MAP2K1/SRC	2
hsa-miR-103a-3p	hsa04935	Growth hormone synthesis, secretion and action	0.047259	0.103319	CREB1/CACNA1C	2
hsa-miR-34a-5p	hsa04935	Growth hormone synthesis, secretion and action	0.186312	0.14922	MAP2K1/AKT1/FOS	3
hsa-miR-501-5p	hsa04935	Growth hormone synthesis, secretion and action	0.0570905	0.066262	GSK3B	1
hsa-miR-874-3p	hsa04935	Growth hormone synthesis, secretion and action	0.0844115	0.084726	STAT3	1
hsa-miR-34a-5p	hsa04340	Hedgehog signaling pathway	0.0319385	0.0375537	CCND1/BCL2/GAS1	3
hsa-miR-501-5p	hsa04340	Hedgehog signaling pathway	0.0269555	0.066262	GSK3B	1
hsa-miR-34a-5p	hsa04640	Hematopoietic cell lineage	0.034242	0.0398383	CD44/CSF1R/KIT/IL6R	4
hsa-miR-103a-3p	hsa05161	Hepatitis B	0.0111972	0.0501604	CCNE1/CDK2/CREB1	3
hsa-miR-34a-5p	hsa05161	Hepatitis B	9.96887e-09	5.24678e-08	MYC/CCNE2/E2F3/BCL2/MAP2K1/IFNB1/E2F1/TP53/BIRC5/SRC/SMAD4/BAX/AKT1/FOS	14
hsa-miR-874-3p	hsa05161	Hepatitis B	0.00548756	0.0224637	STAT3/E2F3	2
hsa-miR-103a-3p	hsa05160	Hepatitis C	0.0759731	0.143949	CDK2/CDK6	2
hsa-miR-34a-5p	hsa05160	Hepatitis C	4.70505e-07	1.5295e-06	MYC/CDK4/CDK6/CCND1/E2F3/MAP2K1/IFNB1/E2F1/TP53/BAX/PPARA/AKT1	12
hsa-miR-501-5p	hsa05160	Hepatitis C	0.0741897	0.066262	GSK3B	1
hsa-miR-874-3p	hsa05160	Hepatitis C	0.00516146	0.0224637	STAT3/E2F3	2
hsa-miR-103a-3p	hsa05225	Hepatocellular carcinoma	0.0123543	0.0501604	PTEN/CDK6/DVL1	3
hsa-miR-34a-5p	hsa05225	Hepatocellular carcinoma	1.85075e-10	1.36371e-09	MYC/MET/CDK4/CDK6/CCND1/WNT1/AXIN2/E2F3/MAP2K1/E2F1/TP53/CDKN2A/SMAD4/TCF7/BAX/AKT1	16
hsa-miR-501-5p	hsa05225	Hepatocellular carcinoma	0.0792282	0.0686808	GSK3B	1
hsa-miR-874-3p	hsa05225	Hepatocellular carcinoma	0.11647	0.0912977	E2F3	1
hsa-miR-34a-5p	hsa04066	HIF-1 signaling pathway	5.73065e-05	0.000140753	BCL2/MAP2K1/VEGFA/LDHA/CYBB/IL6R/ERBB2/AKT1	8
hsa-miR-874-3p	hsa04066	HIF-1 signaling pathway	0.0769299	0.083132	STAT3	1
hsa-miR-103a-3p	hsa04390	Hippo signaling pathway	0.0759731	0.143949	ID2/DVL1	2
hsa-miR-34a-5p	hsa04390	Hippo signaling pathway	4.70505e-07	1.5295e-06	MYC/CCND3/CCND1/WNT1/AXIN2/SOX2/BMP7/BIRC5/SMAD4/TCF7/GDF5/PPP1CC	12
hsa-miR-501-5p	hsa04390	Hippo signaling pathway	0.00211725	0.0208011	NKD1/GSK3B	2
hsa-miR-103a-3p	hsa03440	Homologous recombination	0.113145	0.185521	RAD51	1
hsa-miR-34a-5p	hsa03440	Homologous recombination	0.401159	0.2671	RAD51	1
hsa-miR-103a-3p	hsa05163	Human cytomegalovirus infection	0.138939	0.200786	CREB1/CDK6	2
hsa-miR-34a-5p	hsa05163	Human cytomegalovirus infection	1.35439e-08	6.23734e-08	MYC/CDK4/CDK6/CCND1/E2F3/MAP2K1/VEGFA/IFNB1/E2F1/PDGFRA/TP53/CDKN2A/SRC/IL6R/BAX/AKT1	16
hsa-miR-501-5p	hsa05163	Human cytomegalovirus infection	0.105008	0.0754869	GSK3B	1
hsa-miR-874-3p	hsa05163	Human cytomegalovirus infection	0.0103875	0.0294383	STAT3/E2F3	2
hsa-miR-34a-5p	hsa05170	Human immunodeficiency virus 1 infection	0.0477269	0.0507219	BCL2/MAP2K1/IFNB1/BAX/AKT1/FOS	6
hsa-miR-103a-3p	hsa05165	Human papillomavirus infection	0.000294842	0.00418986	CCNE1/CDK2/CREB1/PTEN/CDK6/DVL1	6
hsa-miR-34a-5p	hsa05165	Human papillomavirus infection	2.86412e-09	1.66611e-08	JAG1/CDK4/CCNE2/CCND3/CDK6/CCND1/WNT1/AXIN2/NOTCH1/MAP2K1/VEGFA/IFNB1/E2F1/NOTCH2/TP53/HDAC1/PDGFRB/TCF7/BAX/AKT1	20
hsa-miR-501-5p	hsa05165	Human papillomavirus infection	0.151505	0.101487	GSK3B	1
hsa-miR-874-3p	hsa05165	Human papillomavirus infection	0.218443	0.141191	HDAC1	1
hsa-miR-103a-3p	hsa05166	Human T-cell leukemia virus 1 infection	0.00358606	0.0277963	CCNE1/CDK2/CREB1/PTEN	4
hsa-miR-34a-5p	hsa05166	Human T-cell leukemia virus 1 infection	1.11764e-08	5.61494e-08	MYC/CDK4/CCNE2/CCND3/CCND1/E2F3/MAP2K1/E2F1/SPI1/FOSL1/TP53/CDKN2A/SMAD4/BAX/AKT1/FOS	16
hsa-miR-874-3p	hsa05166	Human T-cell leukemia virus 1 infection	0.151412	0.103302	E2F3	1
hsa-miR-103a-3p	hsa05016	Huntington disease	0.597876	0.424806	CREB1	1
hsa-miR-34a-5p	hsa05016	Huntington disease	0.329867	0.229302	STX1A/TP53/HDAC1/BAX/BECN1	5
hsa-miR-874-3p	hsa05016	Huntington disease	0.203473	0.133864	HDAC1	1
hsa-miR-103a-3p	hsa05410	Hypertrophic cardiomyopathy	0.232309	0.225085	CACNA1C	1
hsa-miR-34a-5p	hsa05410	Hypertrophic cardiomyopathy	0.676634	0.383517	CACNB3	1
hsa-miR-139-3p	hsa04657	IL-17 signaling pathway	0.0227224		ELAVL1	1
hsa-miR-34a-5p	hsa04657	IL-17 signaling pathway	0.110961	0.0997081	CEBPB/FOSL1/FOS	3
hsa-miR-501-5p	hsa04657	IL-17 signaling pathway	0.0449339	0.066262	GSK3B	1
hsa-miR-874-3p	hsa05321	Inflammatory bowel disease	0.0464922	0.078816	STAT3	1
hsa-miR-34a-5p	hsa04750	Inflammatory mediator regulation of TRP channels	0.343715	0.233065	SRC/PPP1CC	2
hsa-miR-103a-3p	hsa05164	Influenza A	0.396383	0.312934	CDK6	1
hsa-miR-34a-5p	hsa05164	Influenza A	0.00522765	0.00837382	CDK4/CCND3/CDK6/MAP2K1/IFNB1/BAX/AKT1	7
hsa-miR-103a-3p	hsa00562	Inositol phosphate metabolism	0.19282	0.215211	PTEN	1
hsa-miR-34a-5p	hsa00562	Inositol phosphate metabolism	0.228971	0.173338	IMPA1/PIK3CG	2
hsa-miR-103a-3p	hsa04931	Insulin resistance	0.0390588	0.0951507	CREB1/PTEN	2
hsa-miR-34a-5p	hsa04931	Insulin resistance	0.149932	0.125541	PPARA/AKT1/PPP1CC	3
hsa-miR-501-5p	hsa04931	Insulin resistance	0.0514943	0.066262	GSK3B	1
hsa-miR-874-3p	hsa04931	Insulin resistance	0.0762473	0.083132	STAT3	1
hsa-miR-103a-3p	hsa04911	Insulin secretion	0.0256836	0.0706408	CREB1/CACNA1C	2
hsa-miR-34a-5p	hsa04911	Insulin secretion	0.288844	0.205967	VAMP2/STX1A	2
hsa-miR-34a-5p	hsa04910	Insulin signaling pathway	0.090108	0.0836916	MAP2K1/AKT1/FLOT2/PPP1CC	4
hsa-miR-501-5p	hsa04910	Insulin signaling pathway	0.0649761	0.066262	GSK3B	1
hsa-miR-34a-5p	hsa04630	JAK-STAT signaling pathway	0.000205126	0.000464943	MYC/CCND3/CCND1/BCL2/IFNB1/PDGFRA/PDGFRB/IL6R/AKT1	9
hsa-miR-874-3p	hsa04630	JAK-STAT signaling pathway	0.115153	0.0912977	STAT3	1
hsa-miR-103a-3p	hsa05167	Kaposi sarcoma-associated herpesvirus infection	0.108903	0.185521	CREB1/CDK6	2
hsa-miR-34a-5p	hsa05167	Kaposi sarcoma-associated herpesvirus infection	1.8482e-11	2.26972e-10	MYC/CDK4/CDK6/CCND1/E2F3/MAP2K1/VEGFA/IFNB1/E2F1/TP53/SRC/TCF7/BAX/BECN1/PIK3CG/AKT1/FOS/RCAN1	18
hsa-miR-501-5p	hsa05167	Kaposi sarcoma-associated herpesvirus infection	0.0910554	0.0718876	GSK3B	1
hsa-miR-874-3p	hsa05167	Kaposi sarcoma-associated herpesvirus infection	0.00779562	0.0261097	STAT3/E2F3	2
hsa-miR-103a-3p	hsa05134	Legionellosis	0.153881	0.214838	BNIP3	1
hsa-miR-34a-5p	hsa05140	Leishmaniasis	0.247355	0.181055	CYBB/FOS	2
hsa-miR-34a-5p	hsa04670	Leukocyte transendothelial migration	0.761205	0.416084	CYBB	1
hsa-miR-103a-3p	hsa00591	Linoleic acid metabolism	0.0840557	0.155801	CYP2C8	1
hsa-miR-103a-3p	hsa05417	Lipid and atherosclerosis	0.47083	0.355261	CYP2C8	1
hsa-miR-34a-5p	hsa05417	Lipid and atherosclerosis	0.00510504	0.00829766	BCL2/IFNB1/TP53/SRC/CYBB/BAX/AKT1/FOS	8
hsa-miR-501-5p	hsa05417	Lipid and atherosclerosis	0.100525	0.0740708	GSK3B	1
hsa-miR-874-3p	hsa05417	Lipid and atherosclerosis	0.146948	0.102149	STAT3	1
hsa-miR-103a-3p	hsa04211	Longevity regulating pathway	0.230039	0.225085	CREB1	1
hsa-miR-34a-5p	hsa04211	Longevity regulating pathway	0.0048395	0.00798347	SIRT1/TP53/BAX/ATG5/AKT1	5
hsa-miR-34a-5p	hsa04213	Longevity regulating pathway - multiple species	0.00716666	0.0109865	SIRT1/HDAC1/ATG5/AKT1	4
hsa-miR-874-3p	hsa04213	Longevity regulating pathway - multiple species	0.0443868	0.078816	HDAC1	1
hsa-miR-34a-5p	hsa04730	Long-term depression	0.528226	0.326162	MAP2K1	1
hsa-miR-103a-3p	hsa04720	Long-term potentiation	0.178423	0.215211	CACNA1C	1
hsa-miR-34a-5p	hsa04720	Long-term potentiation	0.201613	0.159168	MAP2K1/PPP1CC	2
hsa-miR-34a-5p	hsa05144	Malaria	0.465093	0.295431	MET	1
hsa-miR-103a-3p	hsa04010	MAPK signaling pathway	0.582975	0.4177	CACNA1C	1
hsa-miR-34a-5p	hsa04010	MAPK signaling pathway	1.42223e-05	3.65568e-05	MYC/MET/MAP2K1/VEGFA/PDGFRA/TP53/PDGFRB/CSF1R/KIT/CACNB3/ERBB2/STMN1/AKT1/FOS	14
hsa-miR-34a-5p	hsa04950	Maturity onset diabetes of the young	0.0407825	0.0455307	HNF4A/HNF4G	2
hsa-miR-103a-3p	hsa05162	Measles	0.00736723	0.042234	CCNE1/CDK2/CDK6	3
hsa-miR-34a-5p	hsa05162	Measles	1.03348e-06	3.17295e-06	CDK4/CCNE2/CCND3/CDK6/CCND1/BCL2/IFNB1/TP53/BAX/AKT1/FOS	11
hsa-miR-501-5p	hsa05162	Measles	0.0659005	0.066262	GSK3B	1
hsa-miR-874-3p	hsa05162	Measles	0.0972152	0.0904933	STAT3	1
hsa-miR-103a-3p	hsa04916	Melanogenesis	0.0345605	0.0866689	CREB1/DVL1	2
hsa-miR-34a-5p	hsa04916	Melanogenesis	0.0364583	0.041975	WNT1/MAP2K1/KIT/TCF7	4
hsa-miR-501-5p	hsa04916	Melanogenesis	0.0482183	0.066262	GSK3B	1
hsa-miR-103a-3p	hsa05218	Melanoma	0.0184105	0.0599299	PTEN/CDK6	2
hsa-miR-34a-5p	hsa05218	Melanoma	2.89963e-12	4.57836e-11	MET/CDK4/CDK6/CCND1/E2F3/MAP2K1/E2F1/PDGFRA/TP53/CDKN2A/PDGFRB/BAX/AKT1	13
hsa-miR-874-3p	hsa05218	Melanoma	0.0513897	0.078816	E2F3	1
hsa-miR-103a-3p	hsa05206	MicroRNAs in cancer	0.000206502	0.0035214	CCNE1/DICER1/PTEN/TIMP3/CDK6/SERPINB5	6
hsa-miR-34a-5p	hsa05206	MicroRNAs in cancer	2.66092e-13	8.19184e-12	MYC/MET/CCNE2/CDC25A/CDK6/CCND1/E2F3/SIRT1/BCL2/NOTCH1/MDM4/MAP2K1/VEGFA/E2F1/NOTCH2/CD44/FOXP1/PDGFRA/TP53/CDKN2A/HDAC1/PDGFRB/ERBB2/STMN1	24
hsa-miR-874-3p	hsa05206	MicroRNAs in cancer	0.000973656	0.00757336	HDAC1/STAT3/E2F3	3
hsa-miR-103a-3p	hsa04137	Mitophagy - animal	0.190438	0.215211	BNIP3	1
hsa-miR-34a-5p	hsa04137	Mitophagy - animal	0.00192462	0.00343099	E2F1/TP53/SRC/ATG5/BECN1	5
hsa-miR-34a-5p	hsa03015	mRNA surveillance pathway	0.703973	0.389038	PPP1CC	1
hsa-miR-103a-3p	hsa04150	mTOR signaling pathway	0.0751363	0.143949	PTEN/DVL1	2
hsa-miR-34a-5p	hsa04150	mTOR signaling pathway	0.128214	0.112468	WNT1/MAP2K1/RICTOR/AKT1	4
hsa-miR-501-5p	hsa04150	mTOR signaling pathway	0.00209062	0.0208011	LAMTOR5/GSK3B	2
hsa-miR-34a-5p	hsa00512	Mucin type O-glycan biosynthesis	0.362429	0.244256	GALNT7	1
hsa-miR-34a-5p	hsa04650	Natural killer cell mediated cytotoxicity	0.221466	0.169985	MAP2K1/IFNB1/ULBP2	3
hsa-miR-34a-5p	hsa04217	Necroptosis	0.0472727	0.0507219	BCL2/IFNB1/CYBB/BAX/HMGB1	5
hsa-miR-874-3p	hsa04217	Necroptosis	0.110531	0.0904933	STAT3	1
hsa-miR-34a-5p	hsa04722	Neurotrophin signaling pathway	0.0159328	0.0207176	BCL2/MAP2K1/TP53/BAX/AKT1	5
hsa-miR-501-5p	hsa04722	Neurotrophin signaling pathway	0.0566251	0.066262	GSK3B	1
hsa-miR-34a-5p	hsa04613	Neutrophil extracellular trap formation	0.00915184	0.0131366	MAP2K1/HDAC1/SRC/CYBB/ATG7/AKT1/HMGB1	7
hsa-miR-874-3p	hsa04613	Neutrophil extracellular trap formation	0.130847	0.0973697	HDAC1	1
hsa-miR-34a-5p	hsa04064	NF-kappa B signaling pathway	0.729021	0.400876	BCL2	1
hsa-miR-34a-5p	hsa00510	N-Glycan biosynthesis	0.465093	0.295431	FUT8	1
hsa-miR-34a-5p	hsa00760	Nicotinate and nicotinamide metabolism	0.00982136	0.0139169	SIRT1/NAMPT/SIRT7	3
hsa-miR-34a-5p	hsa04621	NOD-like receptor signaling pathway	0.0809334	0.0771144	BCL2/IFNB1/NAMPT/CYBB/ATG5	5
hsa-miR-34a-5p	hsa04932	Non-alcoholic fatty liver disease	0.0431625	0.0472336	IL6R/BAX/PPARA/AKT1/FOS	5
hsa-miR-501-5p	hsa04932	Non-alcoholic fatty liver disease	0.0732715	0.066262	GSK3B	1
hsa-miR-103a-3p	hsa05223	Non-small cell lung cancer	0.190438	0.215211	CDK6	1
hsa-miR-34a-5p	hsa05223	Non-small cell lung cancer	5.65988e-11	5.68696e-10	MET/CDK4/CDK6/CCND1/E2F3/MAP2K1/E2F1/TP53/CDKN2A/BAX/ERBB2/AKT1	12
hsa-miR-874-3p	hsa05223	Non-small cell lung cancer	0.00110758	0.00757336	STAT3/E2F3	2
hsa-miR-103a-3p	hsa04330	Notch signaling pathway	0.158845	0.214838	DVL1	1
hsa-miR-34a-5p	hsa04330	Notch signaling pathway	8.29467e-05	0.0001993	JAG1/DLL1/NOTCH1/NOTCH2/HDAC1/NUMB	6
hsa-miR-874-3p	hsa04330	Notch signaling pathway	0.0422775	0.078816	HDAC1	1
hsa-miR-34a-5p	hsa01232	Nucleotide metabolism	0.655589	0.382761	IMPDH2	1
hsa-miR-103a-3p	hsa04114	Oocyte meiosis	0.0552832	0.116531	CCNE1/CDK2	2
hsa-miR-34a-5p	hsa04114	Oocyte meiosis	0.079404	0.076315	CCNE2/MAP2K1/AR/PPP1CC	4
hsa-miR-103a-3p	hsa04380	Osteoclast differentiation	0.313996	0.266788	CREB1	1
hsa-miR-34a-5p	hsa04380	Osteoclast differentiation	0.00101604	0.00200535	MAP2K1/IFNB1/SPI1/FOSL1/CSF1R/AKT1/FOS	7
hsa-miR-34a-5p	hsa00514	Other types of O-glycan biosynthesis	0.444571	0.285679	GALNT7	1
hsa-miR-103a-3p	hsa04921	Oxytocin signaling pathway	0.365014	0.290862	CACNA1C	1
hsa-miR-34a-5p	hsa04921	Oxytocin signaling pathway	0.000622457	0.00125087	CCND1/MAP2K1/SRC/CACNB3/PIK3CG/FOS/PPP1CC/RCAN1	8
hsa-miR-103a-3p	hsa04115	p53 signaling pathway	1.78482e-06	0.000152179	CCNE1/CDK2/PTEN/CDK6/SERPINB5	5
hsa-miR-34a-5p	hsa04115	p53 signaling pathway	1.78373e-08	7.58264e-08	CDK4/CCNE2/CCND3/CDK6/CCND1/BCL2/MDM4/TP53/CDKN2A/BAX	10
hsa-miR-103a-3p	hsa05212	Pancreatic cancer	0.0203836	0.0599299	RAD51/CDK6	2
hsa-miR-34a-5p	hsa05212	Pancreatic cancer	2.96467e-13	8.19184e-12	CDK4/CDK6/CCND1/E2F3/MAP2K1/VEGFA/E2F1/TP53/CDKN2A/SMAD4/BAX/ERBB2/AKT1/RAD51	14
hsa-miR-874-3p	hsa05212	Pancreatic cancer	0.00123338	0.00757336	STAT3/E2F3	2
hsa-miR-103a-3p	hsa04928	Parathyroid hormone synthesis, secretion and action	0.00345598	0.0277963	CREB1/MEF2D/RUNX2	3
hsa-miR-34a-5p	hsa04928	Parathyroid hormone synthesis, secretion and action	0.0423551	0.0468135	BCL2/MAP2K1/FOS/NR4A2	4
hsa-miR-34a-5p	hsa05012	Parkinson disease	0.847437	0.45468	TP53/BAX	2
hsa-miR-34a-5p	hsa05130	Pathogenic Escherichia coli infection	0.443413	0.285679	SRC/BAX/FOS	3
hsa-miR-103a-3p	hsa05022	Pathways of neurodegeneration - multiple diseases	0.408384	0.31945	DVL1/CACNA1C	2
hsa-miR-34a-5p	hsa05022	Pathways of neurodegeneration - multiple diseases	0.237049	0.177028	WNT1/AXIN2/BCL2/MAP2K1/STX1A/CYBB/BAX/BECN1	8
hsa-miR-501-5p	hsa05022	Pathways of neurodegeneration - multiple diseases	0.0185386	0.066262	DKK1/GSK3B	2
hsa-miR-103a-3p	hsa05235	PD-L1 expression and PD-1 checkpoint pathway in cancer	0.230039	0.225085	PTEN	1
hsa-miR-34a-5p	hsa05235	PD-L1 expression and PD-1 checkpoint pathway in cancer	0.0981417	0.0903936	MAP2K1/AKT1/FOS	3
hsa-miR-874-3p	hsa05235	PD-L1 expression and PD-1 checkpoint pathway in cancer	0.0631966	0.083132	STAT3	1
hsa-miR-34a-5p	hsa04146	Peroxisome	0.270406	0.194071	ACSL4/ACSL1	2
hsa-miR-34a-5p	hsa05133	Pertussis	0.614236	0.364996	FOS	1
hsa-miR-34a-5p	hsa04145	Phagosome	0.852516	0.455196	CYBB	1
hsa-miR-103a-3p	hsa04070	Phosphatidylinositol signaling system	0.248026	0.231457	PTEN	1
hsa-miR-34a-5p	hsa04070	Phosphatidylinositol signaling system	0.703973	0.389038	IMPA1	1
hsa-miR-34a-5p	hsa04072	Phospholipase D signaling pathway	0.00234887	0.00412082	MAP2K1/PDGFRA/PDGFRB/KIT/PIK3CG/AKT1/AGTR1	7
hsa-miR-103a-3p	hsa04151	PI3K-Akt signaling pathway	0.000423411	0.00515734	CCNE1/CDK2/CREB1/PTEN/CDK6/MYB	6
hsa-miR-34a-5p	hsa04151	PI3K-Akt signaling pathway	1.50524e-09	9.2427e-09	MYC/MYB/MET/CDK4/CCNE2/CCND3/CDK6/CCND1/BCL2/MAP2K1/VEGFA/IFNB1/PDGFRA/TP53/PDGFRB/CSF1R/KIT/IL6R/ERBB2/PIK3CG/AKT1	21
hsa-miR-501-5p	hsa04151	PI3K-Akt signaling pathway	0.16135	0.10568	GSK3B	1
hsa-miR-34a-5p	hsa04611	Platelet activation	0.0677808	0.0681051	SRC/PIK3CG/AKT1/PPP1CC	4
hsa-miR-34a-5p	hsa01524	Platinum drug resistance	3.0515e-05	7.66525e-05	BCL2/TP53/CDKN2A/BIRC5/BAX/ERBB2/AKT1	7
hsa-miR-34a-5p	hsa03320	PPAR signaling pathway	0.0658786	0.0668011	ACSL4/ACSL1/PPARA	3
hsa-miR-103a-3p	hsa05020	Prion disease	0.0437287	0.0982085	CREB1/CAV1/CACNA1C	3
hsa-miR-34a-5p	hsa05020	Prion disease	0.663497	0.382761	NOTCH1/CYBB/BAX	3
hsa-miR-501-5p	hsa05020	Prion disease	0.126294	0.086566	GSK3B	1
hsa-miR-103a-3p	hsa04914	Progesterone-mediated oocyte maturation	0.259062	0.234984	CDK2	1
hsa-miR-34a-5p	hsa04914	Progesterone-mediated oocyte maturation	0.132716	0.114598	CDC25A/MAP2K1/AKT1	3
hsa-miR-34a-5p	hsa04917	Prolactin signaling pathway	0.00169762	0.00307592	CCND1/MAP2K1/SRC/AKT1/FOS	5
hsa-miR-501-5p	hsa04917	Prolactin signaling pathway	0.0336084	0.066262	GSK3B	1
hsa-miR-874-3p	hsa04917	Prolactin signaling pathway	0.0499926	0.078816	STAT3	1
hsa-miR-34a-5p	hsa00640	Propanoate metabolism	0.329667	0.229302	LDHA	1
hsa-miR-103a-3p	hsa05215	Prostate cancer	0.000161021	0.0034323	CCNE1/CDK2/CREB1/PTEN	4
hsa-miR-34a-5p	hsa05215	Prostate cancer	1.47869e-10	1.25718e-09	CCNE2/CCND1/E2F3/BCL2/MAP2K1/E2F1/PDGFRA/TP53/AR/PDGFRB/TCF7/ERBB2/AKT1	13
hsa-miR-501-5p	hsa05215	Prostate cancer	0.0463425	0.066262	GSK3B	1
hsa-miR-874-3p	hsa05215	Prostate cancer	0.0687102	0.083132	E2F3	1
hsa-miR-34a-5p	hsa04141	Protein processing in endoplasmic reticulum	0.630279	0.372256	BCL2/BAX	2
hsa-miR-103a-3p	hsa05205	Proteoglycans in cancer	0.119341	0.18746	CAV1/TIMP3	2
hsa-miR-34a-5p	hsa05205	Proteoglycans in cancer	1.96848e-07	6.79901e-07	MYC/MET/CCND1/WNT1/MAP2K1/VEGFA/CD44/NANOG/TP53/SRC/ANK3/ERBB2/AKT1/PPP1CC	14
hsa-miR-874-3p	hsa05205	Proteoglycans in cancer	0.140538	0.101524	STAT3	1
hsa-miR-34a-5p	hsa00230	Purine metabolism	0.799997	0.433435	IMPDH2	1
hsa-miR-34a-5p	hsa00620	Pyruvate metabolism	0.444571	0.285679	LDHA	1
hsa-miR-34a-5p	hsa04015	Rap1 signaling pathway	0.000260701	0.000554121	MET/MAP2K1/VEGFA/PDGFRA/PDGFRB/SRC/CSF1R/KIT/AKT1/PRKD1	10
hsa-miR-34a-5p	hsa04014	Ras signaling pathway	0.00880684	0.0128077	MET/MAP2K1/VEGFA/PDGFRA/PDGFRB/CSF1R/KIT/AKT1	8
hsa-miR-34a-5p	hsa04810	Regulation of actin cytoskeleton	0.0646341	0.066146	MAP2K1/PDGFRA/PDGFRB/SRC/AKT1/PPP1CC	6
hsa-miR-34a-5p	hsa04923	Regulation of lipolysis in adipocytes	0.51622	0.32235	AKT1	1
hsa-miR-103a-3p	hsa04926	Relaxin signaling pathway	0.316028	0.266788	CREB1	1
hsa-miR-34a-5p	hsa04926	Relaxin signaling pathway	0.0218094	0.0273922	MAP2K1/VEGFA/SRC/AKT1/FOS	5
hsa-miR-34a-5p	hsa05211	Renal cell carcinoma	0.0104001	0.0143685	MET/MAP2K1/VEGFA/AKT1	4
hsa-miR-103a-3p	hsa04924	Renin secretion	0.0169878	0.0599299	CREB1/CACNA1C	2
hsa-miR-34a-5p	hsa04924	Renin secretion	0.578706	0.347621	AGTR1	1
hsa-miR-34a-5p	hsa04614	Renin-angiotensin system	0.249734	0.181594	AGTR1	1
hsa-miR-103a-3p	hsa00830	Retinol metabolism	0.18084	0.215211	CYP2C8	1
hsa-miR-103a-3p	hsa04723	Retrograde endocannabinoid signaling	0.353573	0.284404	CACNA1C	1
hsa-miR-34a-5p	hsa05323	Rheumatoid arthritis	0.32097	0.225959	VEGFA/FOS	2
hsa-miR-139-3p	hsa03008	Ribosome biogenesis in eukaryotes	0.0287216		NOB1	1
hsa-miR-34a-5p	hsa04622	RIG-I-like receptor signaling pathway	0.219816	0.169898	IFNB1/ATG5	2
hsa-miR-874-3p	hsa04622	RIG-I-like receptor signaling pathway	0.0506914	0.078816	PIN1	1
hsa-miR-34a-5p	hsa04970	Salivary secretion	0.68469	0.386104	VAMP2	1
hsa-miR-34a-5p	hsa05132	Salmonella infection	0.0119382	0.0162243	MYC/BCL2/MAP2K1/TCF7/BAX/PIK3CG/AKT1/FOS	8
hsa-miR-103a-3p	hsa04726	Serotonergic synapse	0.0437695	0.0982085	CYP2C8/CACNA1C	2
hsa-miR-34a-5p	hsa04726	Serotonergic synapse	0.764207	0.416084	MAP2K1	1
hsa-miR-103a-3p	hsa05131	Shigellosis	0.519358	0.37848	BNIP3	1
hsa-miR-34a-5p	hsa05131	Shigellosis	0.00345291	0.00587134	BCL2/IFNB1/CD44/TP53/SRC/BAX/ATG5/BECN1/AKT1	9
hsa-miR-501-5p	hsa05131	Shigellosis	0.114811	0.0805695	GSK3B	1
hsa-miR-103a-3p	hsa04550	Signaling pathways regulating pluripotency of stem cells	0.00796563	0.042234	KLF4/ID2/DVL1	3
hsa-miR-34a-5p	hsa04550	Signaling pathways regulating pluripotency of stem cells	1.69489e-07	6.04291e-07	MYC/WNT1/AXIN2/MAP2K1/NANOG/SOX2/KLF4/INHBB/POU5F1/SMAD4/TCF7/AKT1	12
hsa-miR-501-5p	hsa04550	Signaling pathways regulating pluripotency of stem cells	0.0677474	0.066262	GSK3B	1
hsa-miR-874-3p	hsa04550	Signaling pathways regulating pluripotency of stem cells	0.0998916	0.0904933	STAT3	1
hsa-miR-103a-3p	hsa05222	Small cell lung cancer	0.000131125	0.0034323	CCNE1/CDK2/PTEN/CDK6	4
hsa-miR-34a-5p	hsa05222	Small cell lung cancer	1.43903e-08	6.36202e-08	MYC/CDK4/CCNE2/CDK6/CCND1/E2F3/BCL2/E2F1/TP53/BAX/AKT1	11
hsa-miR-874-3p	hsa05222	Small cell lung cancer	0.0652674	0.083132	E2F3	1
hsa-miR-34a-5p	hsa04130	SNARE interactions in vesicular transport	0.0626795	0.0651713	VAMP2/STX1A	2
hsa-miR-103a-3p	hsa04071	Sphingolipid signaling pathway	0.295437	0.25704	PTEN	1
hsa-miR-34a-5p	hsa04071	Sphingolipid signaling pathway	0.0159328	0.0207176	BCL2/MAP2K1/TP53/BAX/AKT1	5
hsa-miR-34a-5p	hsa05017	Spinocerebellar ataxia	0.532538	0.326997	BECN1/AKT1	2
hsa-miR-34a-5p	hsa04721	Synaptic vesicle cycle	0.0723104	0.0720018	VAMP2/SYT1/STX1A	3
hsa-miR-34a-5p	hsa04660	T cell receptor signaling pathway	0.0399352	0.0450397	CDK4/MAP2K1/AKT1/FOS	4
hsa-miR-501-5p	hsa04660	T cell receptor signaling pathway	0.0496233	0.066262	GSK3B	1
hsa-miR-103a-3p	hsa04742	Taste transduction	0.223188	0.225085	CACNA1C	1
hsa-miR-103a-3p	hsa04350	TGF-beta signaling pathway	0.250246	0.231457	ID2	1
hsa-miR-34a-5p	hsa04350	TGF-beta signaling pathway	0.00131352	0.00250309	MYC/BMP7/INHBB/SMAD4/TGIF2/GDF5	6
hsa-miR-34a-5p	hsa04658	Th1 and Th2 cell differentiation	0.00556923	0.00879352	JAG1/DLL1/NOTCH1/NOTCH2/FOS	5
hsa-miR-34a-5p	hsa04659	Th17 cell differentiation	0.149932	0.125541	SMAD4/IL6R/FOS	3
hsa-miR-874-3p	hsa04659	Th17 cell differentiation	0.0762473	0.083132	STAT3	1
hsa-miR-103a-3p	hsa04714	Thermogenesis	0.497167	0.368609	CREB1	1
hsa-miR-34a-5p	hsa04714	Thermogenesis	0.552728	0.337519	KLB/ACSL4/ACSL1	3
hsa-miR-34a-5p	hsa05216	Thyroid cancer	5.3342e-06	1.43797e-05	MYC/CCND1/MAP2K1/TP53/TCF7/BAX	6
hsa-miR-34a-5p	hsa04919	Thyroid hormone signaling pathway	2.22111e-06	6.29465e-06	MYC/CCND1/NOTCH1/MAP2K1/NOTCH2/TP53/HDAC1/SRC/AKT1/RCAN1	10
hsa-miR-501-5p	hsa04919	Thyroid hormone signaling pathway	0.0575557	0.066262	GSK3B	1
hsa-miR-874-3p	hsa04919	Thyroid hormone signaling pathway	0.0850891	0.084726	HDAC1	1
hsa-miR-103a-3p	hsa04918	Thyroid hormone synthesis	0.197565	0.215211	CREB1	1
hsa-miR-34a-5p	hsa04530	Tight junction	0.157585	0.12998	CDK4/CCND1/SRC/ERBB2	4
hsa-miR-103a-3p	hsa04668	TNF signaling pathway	0.28492	0.250446	CREB1	1
hsa-miR-34a-5p	hsa04668	TNF signaling pathway	0.00283916	0.00490315	JAG1/MAP2K1/IFNB1/CEBPB/AKT1/FOS	6
hsa-miR-34a-5p	hsa04620	Toll-like receptor signaling pathway	0.0399352	0.0450397	MAP2K1/IFNB1/AKT1/FOS	4
hsa-miR-34a-5p	hsa05145	Toxoplasmosis	0.161791	0.130527	BCL2/PIK3CG/AKT1	3
hsa-miR-874-3p	hsa05145	Toxoplasmosis	0.0789754	0.083132	STAT3	1
hsa-miR-103a-3p	hsa05202	Transcriptional misregulation in cancer	0.0179023	0.0599299	ID2/MYCN/RUNX2	3
hsa-miR-34a-5p	hsa05202	Transcriptional misregulation in cancer	0.000130834	0.000307672	MYC/MET/MYCN/CEBPB/SPI1/TP53/HDAC1/CSF1R/FUT8/BAX	10
hsa-miR-874-3p	hsa05202	Transcriptional misregulation in cancer	0.00771778	0.0261097	HDAC1/CDK9	2
hsa-miR-103a-3p	hsa05152	Tuberculosis	0.412384	0.319647	CREB1	1
hsa-miR-34a-5p	hsa05152	Tuberculosis	0.0241218	0.0292977	BCL2/IFNB1/CEBPB/SRC/BAX/AKT1	6
hsa-miR-103a-3p	hsa04930	Type II diabetes mellitus	0.126072	0.191952	CACNA1C	1
hsa-miR-34a-5p	hsa00513	Various types of N-glycan biosynthesis	0.385955	0.258534	FUT8	1
hsa-miR-103a-3p	hsa04270	Vascular smooth muscle contraction	0.326106	0.272597	CACNA1C	1
hsa-miR-34a-5p	hsa04270	Vascular smooth muscle contraction	0.231285	0.173898	MAP2K1/AGTR1/PPP1CC	3
hsa-miR-103a-3p	hsa04962	Vasopressin-regulated water reabsorption	0.120923	0.18746	CREB1	1
hsa-miR-34a-5p	hsa04962	Vasopressin-regulated water reabsorption	0.423269	0.278467	VAMP2	1
hsa-miR-874-3p	hsa04962	Vasopressin-regulated water reabsorption	0.031673	0.0777932	AQP3	1
hsa-miR-34a-5p	hsa04370	VEGF signaling pathway	0.00601431	0.00936253	MAP2K1/VEGFA/SRC/AKT1	4
hsa-miR-103a-3p	hsa05203	Viral carcinogenesis	0.0026421	0.0250304	CCNE1/CDK2/CREB1/CDK6	4
hsa-miR-34a-5p	hsa05203	Viral carcinogenesis	0.000206125	0.000464943	CDK4/CCNE2/CCND3/CDK6/CCND1/TP53/CDKN2A/HDAC1/SRC/BAX	10
hsa-miR-874-3p	hsa05203	Viral carcinogenesis	0.00859401	0.0263851	HDAC1/STAT3	2
hsa-miR-874-3p	hsa03250	Viral life cycle - HIV-1	0.00084877	0.00757336	CDK9/PIN1	2
hsa-miR-103a-3p	hsa05416	Viral myocarditis	0.161316	0.214838	CAV1	1
hsa-miR-34a-5p	hsa05416	Viral myocarditis	0.528226	0.326162	CCND1	1
hsa-miR-34a-5p	hsa04061	Viral protein interaction with cytokine and cytokine receptor	0.127142	0.11242	CCL22/CSF1R/IL6R	3
hsa-miR-34a-5p	hsa04977	Vitamin digestion and absorption	0.259062	0.187145	RBP2	1
hsa-miR-103a-3p	hsa04310	Wnt signaling pathway	0.0871225	0.15805	SFRP4/DVL1	2
hsa-miR-34a-5p	hsa04310	Wnt signaling pathway	0.000245262	0.000531528	MYC/CCND3/CCND1/WNT1/AXIN2/FOSL1/TP53/SMAD4/TCF7	9
hsa-miR-501-5p	hsa04310	Wnt signaling pathway	3.41565e-05	0.00100672	DKK1/NKD1/GSK3B	3
hsa-miR-34a-5p	hsa05135	Yersinia infection	0.0274147	0.0329353	MAP2K1/IFNB1/SRC/AKT1/FOS	5
hsa-miR-501-5p	hsa05135	Yersinia infection	0.0649761	0.066262	GSK3B	1

## Sheet: REACTOME pathways
Supplementary Table S4:		Functional enrichment of REACTOME pathways
microRNA	REACTOME ID	Description	p-value	FDR	Genes	Count
hsa-miR-103a-3p	R-HSA-6804116	TP53 Regulates Transcription of Genes Involved in G1 Cell...	0.000340877	0.0289812	CCNE1/CDK2	2
hsa-miR-103a-3p	R-HSA-8934593	Regulation of RUNX1 Expression and Activity	0.000507604	0.0289812	CDK6/AGO1	2
hsa-miR-103a-3p	R-HSA-2559583	Cellular Senescence	0.00053634	0.0289812	CCNE1/CDK2/CDK6/AGO1	4
hsa-miR-103a-3p	R-HSA-203927	MicroRNA (miRNA) biogenesis	0.000937496	0.0307176	DICER1/AGO1	2
hsa-miR-103a-3p	R-HSA-8878171	Transcriptional regulation by RUNX1	0.00114952	0.0307176	CDK6/MYB/AGO1/RUNX2	4
hsa-miR-103a-3p	R-HSA-1538133	G0 and Early G1	0.00129439	0.0307176	CCNE1/CDK2	2
hsa-miR-103a-3p	R-HSA-157118	Signaling by NOTCH	0.00132644	0.0307176	CREB1/AGO1/ADAM10	3
hsa-miR-103a-3p	R-HSA-4641262	Disassembly of the destruction complex and recruitment of...	0.00170656	0.0313367	CAV1/DVL1	2
hsa-miR-103a-3p	R-HSA-1980145	Signaling by NOTCH2	0.00193311	0.0313367	CREB1/ADAM10	2
hsa-miR-103a-3p	R-HSA-2559585	Oncogene Induced Senescence	0.00193311	0.0313367	CDK6/AGO1	2
hsa-miR-103a-3p	R-HSA-453279	Mitotic G1-G1/S phases	0.00296156	0.043644	CCNE1/CDK2/CDK6	3
hsa-miR-103a-3p	R-HSA-6791312	TP53 Regulates Transcription of Cell Cycle Genes	0.00422355	0.055567	CCNE1/CDK2	2
hsa-miR-103a-3p	R-HSA-8848021	Signaling by PTK6	0.0051086	0.055567	CCNE1/CDK2	2
hsa-miR-103a-3p	R-HSA-9006927	Signaling by Non-Receptor Tyrosine Kinases	0.0051086	0.055567	CCNE1/CDK2	2
hsa-miR-103a-3p	R-HSA-3700989	Transcriptional Regulation by TP53	0.00545729	0.055567	CCNE1/CDK2/PTEN/AGO1	4
hsa-miR-103a-3p	R-HSA-2151201	Transcriptional activation of mitochondrial biogenesis	0.00548454	0.055567	CREB1/MEF2D	2
hsa-miR-103a-3p	R-HSA-187577	SCF(Skp2)-mediated degradation of p27/p21	0.00627346	0.0598213	CCNE1/CDK2	2
hsa-miR-103a-3p	R-HSA-375165	NCAM signaling for neurite out-growth	0.00732811	0.0611789	CREB1/CACNA1C	2
hsa-miR-103a-3p	R-HSA-69563	p53-Dependent G1 DNA Damage Response	0.00754805	0.0611789	CCNE1/CDK2	2
hsa-miR-103a-3p	R-HSA-69580	p53-Dependent G1/S DNA damage checkpoint	0.00754805	0.0611789	CCNE1/CDK2	2
hsa-miR-103a-3p	R-HSA-69615	G1/S DNA Damage Checkpoints	0.00799686	0.0617301	CCNE1/CDK2	2
hsa-miR-103a-3p	R-HSA-400253	Circadian Clock	0.00845748	0.0623183	CREB1/MEF2D	2
hsa-miR-103a-3p	R-HSA-2262752	Cellular responses to stress	0.00941955	0.0663895	CCNE1/CDK2/CDK6/AGO1	4
hsa-miR-103a-3p	R-HSA-2559586	DNA Damage/Telomere Stress Induced Senescence	0.0109347	0.0714777	CCNE1/CDK2	2
hsa-miR-103a-3p	R-HSA-69656	Cyclin A:Cdk2-associated events at S phase entry	0.0111981	0.0714777	CCNE1/CDK2	2
hsa-miR-103a-3p	R-HSA-69202	Cyclin E associated events during G1/S transition	0.0114643	0.0714777	CCNE1/CDK2	2
hsa-miR-103a-3p	R-HSA-5628897	TP53 Regulates Metabolic Genes	0.012557	0.0743197	PTEN/AGO1	2
hsa-miR-103a-3p	R-HSA-912446	Meiotic recombination	0.012837	0.0743197	CDK2/RAD51	2
hsa-miR-103a-3p	R-HSA-1257604	PIP3 activates AKT signaling	0.0135788	0.0755662	CREB1/PTEN/AGO1	3
hsa-miR-103a-3p	R-HSA-2219528	PI3K/AKT Signaling in Cancer	0.0139846	0.0755662	CREB1/PTEN	2
hsa-miR-103a-3p	R-HSA-1592230	Mitochondrial biogenesis	0.0151754	0.0793552	CREB1/MEF2D	2
hsa-miR-103a-3p	R-HSA-9006925	Intracellular signaling by second messengers	0.0187787	0.0951289	CREB1/PTEN/AGO1	3
hsa-miR-103a-3p	R-HSA-418889	Ligand-independent caspase activation via DCC	0.0198051	0.0954193	DAPK1	1
hsa-miR-103a-3p	R-HSA-2559582	Senescence-Associated Secretory Phenotype (SASP)	0.0200133	0.0954193	CDK2/CDK6	2
hsa-miR-103a-3p	R-HSA-211999	CYP2E1 reactions	0.0217649	0.0961325	CYP2C8	1
hsa-miR-103a-3p	R-HSA-1500620	Meiosis	0.0231878	0.0961325	CDK2/RAD51	2
hsa-miR-103a-3p	R-HSA-1980148	Signaling by NOTCH3	0.023721	0.0961325	ADAM10	1
hsa-miR-103a-3p	R-HSA-1980150	Signaling by NOTCH4	0.023721	0.0961325	ADAM10	1
hsa-miR-103a-3p	R-HSA-203615	eNOS activation	0.023721	0.0961325	CAV1	1
hsa-miR-103a-3p	R-HSA-2197563	NOTCH2 intracellular domain regulates transcription	0.023721	0.0961325	CREB1	1
hsa-miR-103a-3p	R-HSA-2559580	Oxidative Stress Induced Senescence	0.0254127	0.100477	CDK6/AGO1	2
hsa-miR-103a-3p	R-HSA-195721	Signaling by WNT	0.0268093	0.101572	CAV1/AGO1/DVL1	3
hsa-miR-103a-3p	R-HSA-69206	G1/S Transition	0.026943	0.101572	CCNE1/CDK2	2
hsa-miR-103a-3p	R-HSA-5693567	HDR through Homologous Recombination (HR) or Single Stran...	0.028115	0.101606	CDK2/RAD51	2
hsa-miR-103a-3p	R-HSA-211000	Gene Silencing by RNA	0.0289077	0.101606	DICER1/AGO1	2
hsa-miR-103a-3p	R-HSA-2691230	Signaling by NOTCH1 HD Domain Mutants in Cancer	0.029567	0.101606	ADAM10	1
hsa-miR-103a-3p	R-HSA-2691232	Constitutive Signaling by NOTCH1 HD Domain Mutants	0.029567	0.101606	ADAM10	1
hsa-miR-103a-3p	R-HSA-5693538	Homology Directed Repair	0.0305201	0.101606	CDK2/RAD51	2
hsa-miR-103a-3p	R-HSA-69242	S Phase	0.0309288	0.101606	CCNE1/CDK2	2
hsa-miR-103a-3p	R-HSA-6807070	PTEN Regulation	0.0313396	0.101606	PTEN/AGO1	2
hsa-miR-103a-3p	R-HSA-1474165	Reproduction	0.0334268	0.102297	CDK2/RAD51	2
hsa-miR-103a-3p	R-HSA-3858494	Beta-catenin independent WNT signaling	0.0334268	0.102297	AGO1/DVL1	2
hsa-miR-103a-3p	R-HSA-442729	CREB phosphorylation through the activation of CaMKII	0.0334457	0.102297	CREB1	1
hsa-miR-103a-3p	R-HSA-5663202	Diseases of signal transduction	0.0371837	0.109966	CREB1/PTEN/ADAM10	3
hsa-miR-103a-3p	R-HSA-422085	Synthesis, secretion, and deacylation of Ghrelin	0.0373097	0.109966	KLF4	1
hsa-miR-103a-3p	R-HSA-111931	PKA-mediated phosphorylation of CREB	0.0392362	0.112509	CREB1	1
hsa-miR-103a-3p	R-HSA-5693532	DNA Double-Strand Break Repair	0.0427664	0.112509	CDK2/RAD51	2
hsa-miR-103a-3p	R-HSA-202131	Metabolism of nitric oxide	0.0430782	0.112509	CAV1	1
hsa-miR-103a-3p	R-HSA-203765	eNOS activation and regulation	0.0430782	0.112509	CAV1	1
hsa-miR-103a-3p	R-HSA-2979096	NOTCH2 Activation and Transmission of Signal to the Nucleus	0.0430782	0.112509	ADAM10	1
hsa-miR-103a-3p	R-HSA-983231	Factors involved in megakaryocyte development and platele...	0.0460757	0.112509	CDK2/MYB	2
hsa-miR-103a-3p	R-HSA-163560	Triglyceride catabolism	0.0469055	0.112509	CAV1	1
hsa-miR-103a-3p	R-HSA-211981	Xenobiotics	0.0469055	0.112509	CYP2C8	1
hsa-miR-103a-3p	R-HSA-8940973	RUNX2 regulates osteoblast differentiation	0.0469055	0.112509	RUNX2	1
hsa-miR-103a-3p	R-HSA-198725	Nuclear Events (kinase and transcription factor activation)	0.0488137	0.112509	CREB1	1
hsa-miR-103a-3p	R-HSA-210991	Basigin interactions	0.0488137	0.112509	CAV1	1
hsa-miR-103a-3p	R-HSA-5674400	Constitutive Signaling by AKT1 E17K in Cancer	0.0488137	0.112509	CREB1	1
hsa-miR-103a-3p	R-HSA-69273	Cyclin A/B1/B2 associated events during G2/M transition	0.0488137	0.112509	CDK2	1
hsa-miR-103a-3p	R-HSA-5693554	Resolution of D-loop Structures through Synthesis-Depende...	0.0507182	0.112509	RAD51	1
hsa-miR-103a-3p	R-HSA-5357769	Caspase activation via extrinsic apoptotic signalling pat...	0.0526191	0.112509	DAPK1	1
hsa-miR-103a-3p	R-HSA-5576893	Phase 2 - plateau phase	0.0526191	0.112509	CACNA1C	1
hsa-miR-103a-3p	R-HSA-111933	Calmodulin induced events	0.0545164	0.112509	CREB1	1
hsa-miR-103a-3p	R-HSA-111997	CaM pathway	0.0545164	0.112509	CREB1	1
hsa-miR-103a-3p	R-HSA-1855204	Synthesis of IP3 and IP4 in the cytosol	0.0545164	0.112509	PTEN	1
hsa-miR-103a-3p	R-HSA-400042	Adrenaline,noradrenaline inhibits insulin secretion	0.0545164	0.112509	CACNA1C	1
hsa-miR-103a-3p	R-HSA-539107	Activation of E2F1 target genes at G1/S	0.0545164	0.112509	CCNE1	1
hsa-miR-103a-3p	R-HSA-69205	G1/S-Specific Transcription	0.0545164	0.112509	CCNE1	1
hsa-miR-103a-3p	R-HSA-1912408	Pre-NOTCH Transcription and Translation	0.0564101	0.112509	AGO1	1
hsa-miR-103a-3p	R-HSA-2032785	YAP1- and WWTR1 (TAZ)-stimulated gene expression	0.0564101	0.112509	RUNX2	1
hsa-miR-103a-3p	R-HSA-442742	CREB phosphorylation through the activation of Ras	0.0564101	0.112509	CREB1	1
hsa-miR-103a-3p	R-HSA-5218920	VEGFR2 mediated vascular permeability	0.0564101	0.112509	CAV1	1
hsa-miR-103a-3p	R-HSA-111996	Ca-dependent events	0.0583002	0.112509	CREB1	1
hsa-miR-103a-3p	R-HSA-375170	CDO in myogenesis	0.0583002	0.112509	MEF2D	1
hsa-miR-103a-3p	R-HSA-525793	Myogenesis	0.0583002	0.112509	MEF2D	1
hsa-miR-103a-3p	R-HSA-2122948	Activated NOTCH1 Transmits Signal to the Nucleus	0.0601866	0.113448	ADAM10	1
hsa-miR-103a-3p	R-HSA-450282	MAPK targets/ Nuclear events mediated by MAP kinases	0.0601866	0.113448	CREB1	1
hsa-miR-103a-3p	R-HSA-68962	Activation of the pre-replicative complex	0.0620695	0.114339	CDK2	1
hsa-miR-103a-3p	R-HSA-8941326	RUNX2 regulates bone development	0.0620695	0.114339	RUNX2	1
hsa-miR-103a-3p	R-HSA-5693568	Resolution of D-loop Structures through Holliday Junction...	0.0639487	0.115792	RAD51	1
hsa-miR-103a-3p	R-HSA-1489509	DAG and IP3 signaling	0.0658244	0.115792	CREB1	1
hsa-miR-103a-3p	R-HSA-5693537	Resolution of D-Loop Structures	0.0658244	0.115792	RAD51	1
hsa-miR-103a-3p	R-HSA-1483257	Phospholipid metabolism	0.0661347	0.115792	GPD1/PTEN	2
hsa-miR-103a-3p	R-HSA-8953750	Transcriptional Regulation by E2F6	0.0676965	0.115792	RAD51	1
hsa-miR-103a-3p	R-HSA-452723	Transcriptional regulation of pluripotent stem cells	0.069565	0.115792	KLF4	1
hsa-miR-103a-3p	R-HSA-6804757	Regulation of TP53 Degradation	0.069565	0.115792	CDK2	1
hsa-miR-103a-3p	R-HSA-176187	Activation of ATR in response to replication stress	0.07143	0.115792	CDK2	1
hsa-miR-103a-3p	R-HSA-438064	Post NMDA receptor activation events	0.07143	0.115792	CREB1	1
hsa-miR-103a-3p	R-HSA-5685938	HDR through Single Strand Annealing (SSA)	0.07143	0.115792	RAD51	1
hsa-miR-103a-3p	R-HSA-6806003	Regulation of TP53 Expression and Degradation	0.07143	0.115792	CDK2	1
hsa-miR-103a-3p	R-HSA-8979227	Triglyceride metabolism	0.07143	0.115792	CAV1	1
hsa-miR-103a-3p	R-HSA-5689896	Ovarian tumor domain proteases	0.0732914	0.117633	PTEN	1
hsa-miR-103a-3p	R-HSA-390471	Association of TriC/CCT with target proteins during biosy...	0.0751492	0.118273	CCNE1	1
hsa-miR-103a-3p	R-HSA-5693616	Presynaptic phase of homologous DNA pairing and strand ex...	0.0751492	0.118273	RAD51	1
hsa-miR-103a-3p	R-HSA-1483166	Synthesis of PA	0.0770035	0.120026	GPD1	1
hsa-miR-103a-3p	R-HSA-201681	TCF dependent signaling in response to WNT	0.0779598	0.120359	CAV1/DVL1	2
hsa-miR-103a-3p	R-HSA-442755	Activation of NMDA receptor and postsynaptic events	0.0788543	0.120591	CREB1	1
hsa-miR-103a-3p	R-HSA-419037	NCAM1 interactions	0.0807015	0.121131	CACNA1C	1
hsa-miR-103a-3p	R-HSA-5693579	Homologous DNA Pairing and Strand Exchange	0.0807015	0.121131	RAD51	1
hsa-miR-103a-3p	R-HSA-177929	Signaling by EGFR	0.0825452	0.122762	ADAM10	1
hsa-miR-103a-3p	R-HSA-69231	Cyclin D associated events in G1	0.0843853	0.123237	CDK6	1
hsa-miR-103a-3p	R-HSA-69236	G1 Phase	0.0843853	0.123237	CDK6	1
hsa-miR-103a-3p	R-HSA-1912422	Pre-NOTCH Expression and Processing	0.086222	0.124795	AGO1	1
hsa-miR-103a-3p	R-HSA-112043	PLC beta mediated events	0.0880551	0.125212	CREB1	1
hsa-miR-103a-3p	R-HSA-5576892	Phase 0 - rapid depolarisation	0.0880551	0.125212	CACNA1C	1
hsa-miR-103a-3p	R-HSA-112040	G-protein mediated events	0.0898848	0.12561	CREB1	1
hsa-miR-103a-3p	R-HSA-1368108	BMAL1:CLOCK,NPAS2 activates circadian gene expression	0.0898848	0.12561	CREB1	1
hsa-miR-103a-3p	R-HSA-1483249	Inositol phosphate metabolism	0.0953527	0.132113	PTEN	1
hsa-miR-103a-3p	R-HSA-3928665	EPH-ephrin mediated repulsion of cells	0.0971684	0.132366	ADAM10	1
hsa-miR-103a-3p	R-HSA-69017	CDK-mediated phosphorylation and removal of Cdc6	0.0971684	0.132366	CDK2	1
hsa-miR-103a-3p	R-HSA-1660499	Synthesis of PIPs at the plasma membrane	0.100789	0.136154	PTEN	1
hsa-miR-103a-3p	R-HSA-4641258	Degradation of DVL	0.10799	0.141239	DVL1	1
hsa-miR-103a-3p	R-HSA-2644602	Signaling by NOTCH1 PEST Domain Mutants in Cancer	0.109781	0.141239	ADAM10	1
hsa-miR-103a-3p	R-HSA-2644603	Signaling by NOTCH1 in Cancer	0.109781	0.141239	ADAM10	1
hsa-miR-103a-3p	R-HSA-2644606	Constitutive Signaling by NOTCH1 PEST Domain Mutants	0.109781	0.141239	ADAM10	1
hsa-miR-103a-3p	R-HSA-2894858	Signaling by NOTCH1 HD+PEST Domain Mutants in Cancer	0.109781	0.141239	ADAM10	1
hsa-miR-103a-3p	R-HSA-2894862	Constitutive Signaling by NOTCH1 HD+PEST Domain Mutants	0.109781	0.141239	ADAM10	1
hsa-miR-103a-3p	R-HSA-2142753	Arachidonic acid metabolism	0.11157	0.14241	CYP2C8	1
hsa-miR-103a-3p	R-HSA-69620	Cell Cycle Checkpoints	0.114972	0.144683	CCNE1/CDK2	2
hsa-miR-103a-3p	R-HSA-4086398	Ca2+ pathway	0.115135	0.144683	AGO1	1
hsa-miR-103a-3p	R-HSA-1852241	Organelle biogenesis and maintenance	0.117585	0.146624	CREB1/MEF2D	2
hsa-miR-103a-3p	R-HSA-1442490	Collagen degradation	0.120459	0.147932	ADAM10	1
hsa-miR-103a-3p	R-HSA-450294	MAP kinase activation in TLR cascade	0.120459	0.147932	CREB1	1
hsa-miR-103a-3p	R-HSA-211897	Cytochrome P450 - arranged by substrate type	0.123991	0.151125	CYP2C8	1
hsa-miR-103a-3p	R-HSA-5685942	HDR through Homologous Recombination (HRR)	0.125752	0.152127	RAD51	1
hsa-miR-103a-3p	R-HSA-8948751	Regulation of PTEN stability and activity	0.129263	0.155197	PTEN	1
hsa-miR-103a-3p	R-HSA-73894	DNA Repair	0.130205	0.155197	CDK2/RAD51	2
hsa-miR-103a-3p	R-HSA-68949	Orc1 removal from chromatin	0.132762	0.155537	CDK2	1
hsa-miR-103a-3p	R-HSA-69052	Switching of origins to a post-replicative state	0.132762	0.155537	CDK2	1
hsa-miR-103a-3p	R-HSA-448424	Interleukin-17 signaling	0.134506	0.155537	CREB1	1
hsa-miR-103a-3p	R-HSA-1980143	Signaling by NOTCH1	0.136247	0.155537	ADAM10	1
hsa-miR-103a-3p	R-HSA-69300	Removal of licensing factors from origins	0.136247	0.155537	CDK2	1
hsa-miR-103a-3p	R-HSA-8939902	Regulation of RUNX2 expression and activity	0.136247	0.155537	RUNX2	1
hsa-miR-103a-3p	R-HSA-69304	Regulation of DNA replication	0.141449	0.160347	CDK2	1
hsa-miR-103a-3p	R-HSA-187037	NGF signalling via TRKA from the plasma membrane	0.144901	0.163119	CREB1	1
hsa-miR-103a-3p	R-HSA-176408	Regulation of APC/C activators between G1/S and early ana...	0.148339	0.164702	CDK2	1
hsa-miR-103a-3p	R-HSA-422356	Regulation of insulin secretion	0.148339	0.164702	CACNA1C	1
hsa-miR-103a-3p	R-HSA-111885	Opioid Signalling	0.153472	0.164781	CREB1	1
hsa-miR-103a-3p	R-HSA-1483255	PI Metabolism	0.155176	0.164781	PTEN	1
hsa-miR-103a-3p	R-HSA-381340	Transcriptional regulation of white adipocyte differentia...	0.155176	0.164781	KLF4	1
hsa-miR-103a-3p	R-HSA-68874	M/G1 Transition	0.156877	0.164781	CDK2	1
hsa-miR-103a-3p	R-HSA-69002	DNA Replication Pre-Initiation	0.156877	0.164781	CDK2	1
hsa-miR-103a-3p	R-HSA-168142	Toll Like Receptor 10 (TLR10) Cascade	0.158575	0.164781	CREB1	1
hsa-miR-103a-3p	R-HSA-168176	Toll Like Receptor 5 (TLR5) Cascade	0.158575	0.164781	CREB1	1
hsa-miR-103a-3p	R-HSA-174143	APC/C-mediated degradation of cell cycle proteins	0.158575	0.164781	CDK2	1
hsa-miR-103a-3p	R-HSA-453276	Regulation of mitotic cell cycle	0.158575	0.164781	CDK2	1
hsa-miR-103a-3p	R-HSA-975871	MyD88 cascade initiated on plasma membrane	0.158575	0.164781	CREB1	1
hsa-miR-103a-3p	R-HSA-5687128	MAPK6/MAPK4 signaling	0.163649	0.166881	AGO1	1
hsa-miR-103a-3p	R-HSA-2980736	Peptide hormone metabolism	0.167016	0.166881	KLF4	1
hsa-miR-103a-3p	R-HSA-6804756	Regulation of TP53 Activity through Phosphorylation	0.167016	0.166881	CDK2	1
hsa-miR-103a-3p	R-HSA-2682334	EPH-Ephrin signaling	0.168694	0.166881	ADAM10	1
hsa-miR-103a-3p	R-HSA-4086400	PCP/CE pathway	0.168694	0.166881	DVL1	1
hsa-miR-103a-3p	R-HSA-975138	TRAF6 mediated induction of NFkB and MAP kinases upon TLR...	0.172042	0.166881	CREB1	1
hsa-miR-103a-3p	R-HSA-166058	MyD88:Mal cascade initiated on plasma membrane	0.175376	0.166881	CREB1	1
hsa-miR-103a-3p	R-HSA-168181	Toll Like Receptor 7/8 (TLR7/8) Cascade	0.175376	0.166881	CREB1	1
hsa-miR-103a-3p	R-HSA-168188	Toll Like Receptor TLR6:TLR2 Cascade	0.175376	0.166881	CREB1	1
hsa-miR-103a-3p	R-HSA-390466	Chaperonin-mediated protein folding	0.175376	0.166881	CCNE1	1
hsa-miR-103a-3p	R-HSA-975155	MyD88 dependent cascade initiated on endosome	0.175376	0.166881	CREB1	1
hsa-miR-103a-3p	R-HSA-8936459	RUNX1 regulates genes involved in megakaryocyte different...	0.177038	0.166881	AGO1	1
hsa-miR-103a-3p	R-HSA-202424	Downstream TCR signaling	0.178698	0.166881	PTEN	1
hsa-miR-103a-3p	R-HSA-5693607	Processing of DNA double-strand break ends	0.178698	0.166881	CDK2	1
hsa-miR-103a-3p	R-HSA-168179	Toll Like Receptor TLR1:TLR2 Cascade	0.180354	0.166881	CREB1	1
hsa-miR-103a-3p	R-HSA-181438	Toll Like Receptor 2 (TLR2) Cascade	0.180354	0.166881	CREB1	1
hsa-miR-103a-3p	R-HSA-4420097	VEGFA-VEGFR2 Pathway	0.180354	0.166881	CAV1	1
hsa-miR-103a-3p	R-HSA-168138	Toll Like Receptor 9 (TLR9) Cascade	0.182006	0.166881	CREB1	1
hsa-miR-103a-3p	R-HSA-69239	Synthesis of DNA	0.182006	0.166881	CDK2	1
hsa-miR-103a-3p	R-HSA-168164	Toll Like Receptor 3 (TLR3) Cascade	0.183656	0.166881	CREB1	1
hsa-miR-103a-3p	R-HSA-199418	Negative regulation of the PI3K/AKT network	0.183656	0.166881	PTEN	1
hsa-miR-103a-3p	R-HSA-166166	MyD88-independent TLR4 cascade	0.185303	0.166881	CREB1	1
hsa-miR-103a-3p	R-HSA-391251	Protein folding	0.185303	0.166881	CCNE1	1
hsa-miR-103a-3p	R-HSA-937061	TRIF(TICAM1)-mediated TLR4 signaling	0.185303	0.166881	CREB1	1
hsa-miR-103a-3p	R-HSA-5578749	Transcriptional regulation by small RNAs	0.190223	0.170366	AGO1	1
hsa-miR-103a-3p	R-HSA-194138	Signaling by VEGF	0.193488	0.170969	CAV1	1
hsa-miR-103a-3p	R-HSA-211945	Phase I - Functionalization of compounds	0.193488	0.170969	CYP2C8	1
hsa-miR-103a-3p	R-HSA-69306	DNA Replication	0.195115	0.170969	CDK2	1
hsa-miR-103a-3p	R-HSA-8957275	Post-translational protein phosphorylation	0.195115	0.170969	ADAM10	1
hsa-miR-103a-3p	R-HSA-163685	Integration of energy metabolism	0.198361	0.172878	CACNA1C	1
hsa-miR-103a-3p	R-HSA-166054	Activated TLR4 signalling	0.209624	0.181717	CREB1	1
hsa-miR-103a-3p	R-HSA-202403	TCR signaling	0.212814	0.183501	PTEN	1
hsa-miR-103a-3p	R-HSA-8878166	Transcriptional regulation by RUNX2	0.215991	0.185256	RUNX2	1
hsa-miR-103a-3p	R-HSA-381426	Regulation of Insulin-like Growth Factor (IGF) transport ...	0.22231	0.189672	ADAM10	1
hsa-miR-103a-3p	R-HSA-114608	Platelet degranulation	0.228581	0.19299	TIMP3	1
hsa-miR-103a-3p	R-HSA-1483206	Glycerophospholipid biosynthesis	0.228581	0.19299	GPD1	1
hsa-miR-103a-3p	R-HSA-8939236	RUNX1 regulates transcription of genes involved in differ...	0.230141	0.193301	MYB	1
hsa-miR-103a-3p	R-HSA-166016	Toll Like Receptor 4 (TLR4) Cascade	0.231698	0.193606	CREB1	1
hsa-miR-103a-3p	R-HSA-76005	Response to elevated platelet cytosolic Ca2+	0.236351	0.196481	TIMP3	1
hsa-miR-103a-3p	R-HSA-202733	Cell surface interactions at the vascular wall	0.240978	0.199305	CAV1	1
hsa-miR-103a-3p	R-HSA-1474228	Degradation of the extracellular matrix	0.244047	0.200819	ADAM10	1
hsa-miR-103a-3p	R-HSA-5576891	Cardiac conduction	0.247105	0.200915	CACNA1C	1
hsa-miR-103a-3p	R-HSA-5663220	RHO GTPases Activate Formins	0.247105	0.200915	DVL1	1
hsa-miR-103a-3p	R-HSA-6798695	Neutrophil degranulation	0.247882	0.200915	OLFM4/ADAM10	2
hsa-miR-103a-3p	R-HSA-112314	Neurotransmitter receptors and postsynaptic signal transm...	0.26818	0.216286	CREB1	1
hsa-miR-103a-3p	R-HSA-168898	Toll-Like Receptors Cascades	0.271145	0.217594	CREB1	1
hsa-miR-103a-3p	R-HSA-5633007	Regulation of TP53 Activity	0.274098	0.21888	CDK2	1
hsa-miR-103a-3p	R-HSA-109581	Apoptosis	0.287246	0.227142	DAPK1	1
hsa-miR-103a-3p	R-HSA-69481	G2/M Checkpoints	0.287246	0.227142	CDK2	1
hsa-miR-103a-3p	R-HSA-5357801	Programmed Cell Death	0.291579	0.229449	DAPK1	1
hsa-miR-103a-3p	R-HSA-166520	Signalling by NGF	0.297316	0.232833	CREB1	1
hsa-miR-103a-3p	R-HSA-8978868	Fatty acid metabolism	0.300168	0.233937	CYP2C8	1
hsa-miR-103a-3p	R-HSA-69275	G2/M Transition	0.326718	0.25341	CDK2	1
hsa-miR-103a-3p	R-HSA-453274	Mitotic G2-G2/M phases	0.329456	0.254317	CDK2	1
hsa-miR-103a-3p	R-HSA-397014	Muscle contraction	0.340303	0.26124	CACNA1C	1
hsa-miR-103a-3p	R-HSA-881907	Gastrin-CREB signalling pathway via PKC and MAPK	0.341648	0.26124	CREB1	1
hsa-miR-103a-3p	R-HSA-5689880	Ub-specific processing proteases	0.358885	0.273132	PTEN	1
hsa-miR-103a-3p	R-HSA-211859	Biological oxidations	0.364102	0.275808	CYP2C8	1
hsa-miR-103a-3p	R-HSA-112315	Transmission across Chemical Synapses	0.366695	0.27648	CREB1	1
hsa-miR-103a-3p	R-HSA-76002	Platelet activation, signaling and aggregation	0.433024	0.324979	TIMP3	1
hsa-miR-103a-3p	R-HSA-5683057	MAPK family signaling cascades	0.442269	0.330387	AGO1	1
hsa-miR-103a-3p	R-HSA-5688426	Deubiquitination	0.452498	0.336478	PTEN	1
hsa-miR-103a-3p	R-HSA-1474244	Extracellular matrix organization	0.455867	0.337436	ADAM10	1
hsa-miR-103a-3p	R-HSA-195258	RHO GTPase Effectors	0.475675	0.350497	DVL1	1
hsa-miR-103a-3p	R-HSA-112316	Neuronal System	0.528135	0.387391	CREB1	1
hsa-miR-103a-3p	R-HSA-194315	Signaling by Rho GTPases	0.597972	0.436641	DVL1	1
hsa-miR-139-3p	R-HSA-1592389	Activation of Matrix Metalloproteinases	0.00938827	0.0471951	MMP11	1
hsa-miR-139-3p	R-HSA-1442490	Collagen degradation	0.0181539	0.0471951	MMP11	1
hsa-miR-139-3p	R-HSA-450531	Regulation of mRNA stability by proteins that bind AU-ric...	0.0249045	0.0471951	ELAVL1	1
hsa-miR-139-3p	R-HSA-1474228	Degradation of the extracellular matrix	0.0391467	0.0471951	MMP11	1
hsa-miR-139-3p	R-HSA-72163	mRNA Splicing - Major Pathway	0.0513221	0.0471951	ELAVL1	1
hsa-miR-139-3p	R-HSA-6791226	Major pathway of rRNA processing in the nucleolus and cyt...	0.0521485	0.0471951	NOB1	1
hsa-miR-139-3p	R-HSA-72172	mRNA Splicing	0.0535247	0.0471951	ELAVL1	1
hsa-miR-139-3p	R-HSA-8868773	rRNA processing in the nucleus and cytosol	0.0548996	0.0471951	NOB1	1
hsa-miR-139-3p	R-HSA-72312	rRNA processing	0.0576454	0.0471951	NOB1	1
hsa-miR-139-3p	R-HSA-72203	Processing of Capped Intron-Containing Pre-mRNA	0.0677586	0.0499274	ELAVL1	1
hsa-miR-139-3p	R-HSA-1474244	Extracellular matrix organization	0.0831963	0.0557296	MMP11	1
hsa-miR-34a-5p	R-HSA-6785807	Interleukin-4 and 13 signaling	8.16096e-10	3.20425e-07	MYC/CCND1/BCL2/VEGFA/NANOG/SOX2/CCL22/TP53/BIRC5/IL6R/AKT1/FOS	12
hsa-miR-34a-5p	R-HSA-453279	Mitotic G1-G1/S phases	2.68809e-09	5.27714e-07	MYC/CDK4/CCNE2/CCND3/CDC25A/CDK6/CCND1/E2F3/E2F1/CDKN2A/HDAC1/SRC/AKT1	13
hsa-miR-34a-5p	R-HSA-69231	Cyclin D associated events in G1	1.15634e-08	1.13504e-06	CDK4/CCND3/CDK6/CCND1/E2F3/E2F1/CDKN2A/SRC	8
hsa-miR-34a-5p	R-HSA-69236	G1 Phase	1.15634e-08	1.13504e-06	CDK4/CCND3/CDK6/CCND1/E2F3/E2F1/CDKN2A/SRC	8
hsa-miR-34a-5p	R-HSA-157118	Signaling by NOTCH	1.46133e-08	1.14753e-06	JAG1/MYC/CCND1/E2F3/DLL1/NOTCH1/E2F1/NOTCH2/TP53/HDAC1/NUMB	11
hsa-miR-34a-5p	R-HSA-2559585	Oncogene Induced Senescence	3.18942e-08	2.08711e-06	CDK4/CDK6/E2F3/MDM4/E2F1/TP53/CDKN2A	7
hsa-miR-34a-5p	R-HSA-8878159	Transcriptional regulation by RUNX3	1.43596e-07	8.05433e-06	JAG1/MYC/CCND1/NOTCH1/TP53/CDKN2A/SRC/SMAD4/TCF7/PPARA	10
hsa-miR-34a-5p	R-HSA-5663202	Diseases of signal transduction	2.09991e-07	1.03061e-05	JAG1/MYC/MET/DLL1/NOTCH1/MAP2K1/PDGFRA/KLB/HDAC1/PDGFRB/SRC/RICTOR/SMAD4/KIT/ATG7/ERBB2/AKT1	17
hsa-miR-34a-5p	R-HSA-1912408	Pre-NOTCH Transcription and Translation	3.79108e-07	1.65389e-05	CCND1/E2F3/NOTCH1/E2F1/NOTCH2/TP53	6
hsa-miR-34a-5p	R-HSA-452723	Transcriptional regulation of pluripotent stem cells	1.46725e-06	5.76088e-05	FOXP1/NANOG/SOX2/KLF4/POU5F1/SMAD4	6
hsa-miR-34a-5p	R-HSA-1257604	PIP3 activates AKT signaling	1.76605e-06	6.3037e-05	MET/PDGFRA/KLB/TP53/MTA2/HDAC1/SNAI1/PDGFRB/SRC/RICTOR/KIT/ERBB2/AKT1	13
hsa-miR-34a-5p	R-HSA-2219528	PI3K/AKT Signaling in Cancer	3.73634e-06	0.000122251	MET/PDGFRA/KLB/PDGFRB/RICTOR/KIT/ERBB2/AKT1	8
hsa-miR-34a-5p	R-HSA-2559583	Cellular Senescence	4.42777e-06	0.000125277	CDK4/CCNE2/CDK6/E2F3/MDM4/IFNB1/E2F1/CEBPB/TP53/CDKN2A/FOS	11
hsa-miR-34a-5p	R-HSA-6811558	PI5P, PP2A and IER3 Regulate PI3K/AKT Signaling	4.77215e-06	0.000125277	MET/PDGFRA/KLB/PDGFRB/SRC/KIT/ERBB2/AKT1	8
hsa-miR-34a-5p	R-HSA-2559580	Oxidative Stress Induced Senescence	4.78603e-06	0.000125277	CDK4/CDK6/E2F3/MDM4/IFNB1/E2F1/TP53/CDKN2A/FOS	9
hsa-miR-34a-5p	R-HSA-1632852	Macroautophagy	5.40466e-06	0.000131571	ATG4A/ATG4B/ATG4C/ATG4D/ATG5/ATG7/BECN1	7
hsa-miR-34a-5p	R-HSA-1912422	Pre-NOTCH Expression and Processing	5.69669e-06	0.000131571	CCND1/E2F3/NOTCH1/E2F1/NOTCH2/TP53	6
hsa-miR-34a-5p	R-HSA-1538133	G0 and Early G1	6.71568e-06	0.000139377	MYC/CCNE2/CDC25A/E2F1/HDAC1	5
hsa-miR-34a-5p	R-HSA-9006925	Intracellular signaling by second messengers	6.74464e-06	0.000139377	MET/PDGFRA/KLB/TP53/MTA2/HDAC1/SNAI1/PDGFRB/SRC/RICTOR/KIT/ERBB2/AKT1	13
hsa-miR-34a-5p	R-HSA-199418	Negative regulation of the PI3K/AKT network	8.16973e-06	0.000160385	MET/PDGFRA/KLB/PDGFRB/SRC/KIT/ERBB2/AKT1	8
hsa-miR-34a-5p	R-HSA-8866910	TFAP2 (AP-2) family regulates transcription of growth fac...	1.27007e-05	0.000237462	YY1/VEGFA/KIT/ERBB2	4
hsa-miR-34a-5p	R-HSA-69202	Cyclin E associated events during G1/S transition	1.88615e-05	0.000336619	MYC/CDK4/CCNE2/CDC25A/CCND1/E2F1/AKT1	7
hsa-miR-34a-5p	R-HSA-8934593	Regulation of RUNX1 Expression and Activity	2.17999e-05	0.000372145	CCND3/CDK6/CCND1/SRC	4
hsa-miR-34a-5p	R-HSA-2262752	Cellular responses to stress	2.72799e-05	0.00044629	CDK4/CCNE2/CDK6/E2F3/SIRT1/MDM4/VEGFA/IFNB1/E2F1/CEBPB/TP53/CDKN2A/AR/CYBB/FOS	15
hsa-miR-34a-5p	R-HSA-6804757	Regulation of TP53 Degradation	2.91589e-05	0.000457949	MDM4/TP53/CDKN2A/RICTOR/AKT1	5
hsa-miR-34a-5p	R-HSA-6806003	Regulation of TP53 Expression and Degradation	3.34436e-05	0.00049009	MDM4/TP53/CDKN2A/RICTOR/AKT1	5
hsa-miR-34a-5p	R-HSA-5683057	MAPK family signaling cascades	3.45524e-05	0.00049009	MYC/MET/CCND3/MAP2K1/PEA15/PDGFRA/KLB/PDGFRB/SRC/KIT/IL6R/ERBB2	12
hsa-miR-34a-5p	R-HSA-1362277	Transcription of E2F targets under negative control by DR...	3.49501e-05	0.00049009	MYC/CDC25A/E2F1/HDAC1	4
hsa-miR-34a-5p	R-HSA-8864260	Transcriptional regulation by the AP-2 (TFAP2) family of ...	3.82009e-05	0.000517203	MYC/YY1/VEGFA/KIT/ERBB2	5
hsa-miR-34a-5p	R-HSA-69206	G1/S Transition	4.87231e-05	0.000620592	MYC/CDK4/CCNE2/CDC25A/CCND1/E2F1/HDAC1/AKT1	8
hsa-miR-34a-5p	R-HSA-2219530	Constitutive Signaling by Aberrant PI3K in Cancer	4.89985e-05	0.000620592	MET/PDGFRA/KLB/PDGFRB/KIT/ERBB2	6
hsa-miR-34a-5p	R-HSA-109606	Intrinsic Pathway for Apoptosis	7.03603e-05	0.000863302	BCL2/E2F1/TP53/BAX/AKT1	5
hsa-miR-34a-5p	R-HSA-1980143	Signaling by NOTCH1	9.45543e-05	0.001125	JAG1/MYC/DLL1/NOTCH1/HDAC1/NUMB	6
hsa-miR-34a-5p	R-HSA-168799	Neurotoxicity of clostridium toxins	0.000116785	0.00134863	VAMP2/SYT1/STX1A	3
hsa-miR-34a-5p	R-HSA-383280	Nuclear Receptor transcription pathway	0.000146365	0.00164193	HNF4A/AR/PPARA/HNF4G/NR4A2	5
hsa-miR-34a-5p	R-HSA-69656	Cyclin A:Cdk2-associated events at S phase entry	0.000168801	0.00184102	MYC/CDK4/CCNE2/CDC25A/CCND1/E2F1	6
hsa-miR-34a-5p	R-HSA-381340	Transcriptional regulation of white adipocyte differentia...	0.000206278	0.00217112	CDK4/CCND3/WNT1/CEBPB/KLF4/PPARA	6
hsa-miR-34a-5p	R-HSA-5684996	MAPK1/MAPK3 signaling	0.000217229	0.00217112	MET/MAP2K1/PEA15/PDGFRA/KLB/PDGFRB/SRC/KIT/IL6R/ERBB2	10
hsa-miR-34a-5p	R-HSA-8878166	Transcriptional regulation by RUNX2	0.000226493	0.00217112	CDK4/CCND1/AR/SRC/SMAD4/BAX/AKT1	7
hsa-miR-34a-5p	R-HSA-114452	Activation of BH3-only proteins	0.000226716	0.00217112	BCL2/E2F1/TP53/AKT1	4
hsa-miR-34a-5p	R-HSA-6804758	Regulation of TP53 Activity through Acetylation	0.000226716	0.00217112	TP53/MTA2/HDAC1/AKT1	4
hsa-miR-34a-5p	R-HSA-2122948	Activated NOTCH1 Transmits Signal to the Nucleus	0.000258277	0.00233046	JAG1/DLL1/NOTCH1/NUMB	4
hsa-miR-34a-5p	R-HSA-5339562	Uptake and actions of bacterial toxins	0.000258277	0.00233046	VAMP2/MAP2K1/SYT1/STX1A	4
hsa-miR-34a-5p	R-HSA-2892247	POU5F1 (OCT4), SOX2, NANOG activate genes related to prol...	0.000272207	0.00233046	NANOG/SOX2/POU5F1	3
hsa-miR-34a-5p	R-HSA-2173796	SMAD2/SMAD3:SMAD4 heterotrimer regulates transcription	0.000292875	0.00233046	MYC/HDAC1/SMAD4/TGIF2	4
hsa-miR-34a-5p	R-HSA-2644602	Signaling by NOTCH1 PEST Domain Mutants in Cancer	0.000296774	0.00233046	JAG1/MYC/DLL1/NOTCH1/HDAC1	5
hsa-miR-34a-5p	R-HSA-2644603	Signaling by NOTCH1 in Cancer	0.000296774	0.00233046	JAG1/MYC/DLL1/NOTCH1/HDAC1	5
hsa-miR-34a-5p	R-HSA-2644606	Constitutive Signaling by NOTCH1 PEST Domain Mutants	0.000296774	0.00233046	JAG1/MYC/DLL1/NOTCH1/HDAC1	5
hsa-miR-34a-5p	R-HSA-2894858	Signaling by NOTCH1 HD+PEST Domain Mutants in Cancer	0.000296774	0.00233046	JAG1/MYC/DLL1/NOTCH1/HDAC1	5
hsa-miR-34a-5p	R-HSA-2894862	Constitutive Signaling by NOTCH1 HD+PEST Domain Mutants	0.000296774	0.00233046	JAG1/MYC/DLL1/NOTCH1/HDAC1	5
hsa-miR-34a-5p	R-HSA-8854691	Interleukin-20 family signaling	0.000317006	0.00244052	MET/MAP2K1/PEA15/PDGFRA/KLB/PDGFRB/SRC/KIT/IL6R/ERBB2	10
hsa-miR-34a-5p	R-HSA-186712	Regulation of beta-cell development	0.000330677	0.00249682	NOTCH1/HNF4A/AKT1/HNF4G	4
hsa-miR-34a-5p	R-HSA-3700989	Transcriptional Regulation by TP53	0.000341666	0.00250038	CCNE2/MDM4/E2F1/TP53/MTA2/CDKN2A/HDAC1/BIRC5/RICTOR/BAX/AKT1/FOS	12
hsa-miR-34a-5p	R-HSA-6804116	TP53 Regulates Transcription of Genes Involved in G1 Cell...	0.000343885	0.00250038	CCNE2/E2F1/TP53	3
hsa-miR-34a-5p	R-HSA-2691230	Signaling by NOTCH1 HD Domain Mutants in Cancer	0.000426682	0.00299158	JAG1/DLL1/NOTCH1	3
hsa-miR-34a-5p	R-HSA-2691232	Constitutive Signaling by NOTCH1 HD Domain Mutants	0.000426682	0.00299158	JAG1/DLL1/NOTCH1	3
hsa-miR-34a-5p	R-HSA-4420097	VEGFA-VEGFR2 Pathway	0.000502827	0.00346361	VEGFA/AXL/SRC/RICTOR/CYBB/AKT1	6
hsa-miR-34a-5p	R-HSA-9006936	Signaling by TGF-beta family members	0.000589584	0.00399119	MYC/HDAC1/INHBB/SMAD4/TGIF2/PPP1CC	6
hsa-miR-34a-5p	R-HSA-69615	G1/S DNA Damage Checkpoints	0.000622964	0.0041115	CCNE2/CDC25A/MDM4/TP53/CDKN2A	5
hsa-miR-34a-5p	R-HSA-264642	Acetylcholine Neurotransmitter Release Cycle	0.000628298	0.0041115	VAMP2/SYT1/STX1A	3
hsa-miR-34a-5p	R-HSA-181429	Serotonin Neurotransmitter Release Cycle	0.000748396	0.00473379	VAMP2/SYT1/STX1A	3
hsa-miR-34a-5p	R-HSA-181430	Norepinephrine Neurotransmitter Release Cycle	0.000748396	0.00473379	VAMP2/SYT1/STX1A	3
hsa-miR-34a-5p	R-HSA-194138	Signaling by VEGF	0.000759563	0.00473379	VEGFA/AXL/SRC/RICTOR/CYBB/AKT1	6
hsa-miR-34a-5p	R-HSA-5673001	RAF/MAP kinase cascade	0.0008128	0.00498642	MET/MAP2K1/PEA15/PDGFRA/KLB/PDGFRB/SRC/KIT/ERBB2	9
hsa-miR-34a-5p	R-HSA-3769402	Deactivation of the beta-catenin transactivating complex	0.000843167	0.00509314	SOX2/HDAC1/TCF7/AKT1	4
hsa-miR-34a-5p	R-HSA-170834	Signaling by TGF-beta Receptor Complex	0.0008623	0.00512979	MYC/HDAC1/SMAD4/TGIF2/PPP1CC	5
hsa-miR-34a-5p	R-HSA-888590	GABA synthesis, release, reuptake and degradation	0.000882167	0.00516965	VAMP2/SYT1/STX1A	3
hsa-miR-34a-5p	R-HSA-2173793	Transcriptional activity of SMAD2/SMAD3:SMAD4 heterotrimer	0.0010068	0.00581324	MYC/HDAC1/SMAD4/TGIF2	4
hsa-miR-34a-5p	R-HSA-5633007	Regulation of TP53 Activity	0.00116716	0.00664149	MDM4/TP53/MTA2/CDKN2A/HDAC1/RICTOR/AKT1	7
hsa-miR-34a-5p	R-HSA-210745	Regulation of gene expression in beta cells	0.00119304	0.00669178	HNF4A/AKT1/HNF4G	3
hsa-miR-34a-5p	R-HSA-2979096	NOTCH2 Activation and Transmission of Signal to the Nucleus	0.00137124	0.00758299	JAG1/DLL1/NOTCH2	3
hsa-miR-34a-5p	R-HSA-6791312	TP53 Regulates Transcription of Cell Cycle Genes	0.0015114	0.00798174	CCNE2/E2F1/TP53/BAX	4
hsa-miR-34a-5p	R-HSA-168928	DDX58/IFIH1-mediated induction of interferon-alpha/beta	0.00153834	0.00798174	IFNB1/PCBP2/ATG5/NLRC5/HMGB1	5
hsa-miR-34a-5p	R-HSA-112409	RAF-independent MAPK1/3 activation	0.00156532	0.00798174	MAP2K1/PEA15/IL6R	3
hsa-miR-34a-5p	R-HSA-212676	Dopamine Neurotransmitter Release Cycle	0.00156532	0.00798174	VAMP2/SYT1/STX1A	3
hsa-miR-34a-5p	R-HSA-2173795	Downregulation of SMAD2/3:SMAD4 transcriptional activity	0.00156532	0.00798174	HDAC1/SMAD4/TGIF2	3
hsa-miR-34a-5p	R-HSA-449836	Other interleukin signaling	0.00156532	0.00798174	VAMP2/STX1A/CSF1R	3
hsa-miR-34a-5p	R-HSA-210500	Glutamate Neurotransmitter Release Cycle	0.00177578	0.00888324	VAMP2/SYT1/STX1A	3
hsa-miR-34a-5p	R-HSA-5689880	Ub-specific processing proteases	0.00178736	0.00888324	MYC/CDC25A/AXIN2/MDM4/TP53/AR/SMAD4/BECN1	8
hsa-miR-34a-5p	R-HSA-8848021	Signaling by PTK6	0.00216995	0.0105184	CDK4/CCND1/ERBB2/AKT1	4
hsa-miR-34a-5p	R-HSA-9006927	Signaling by Non-Receptor Tyrosine Kinases	0.00216995	0.0105184	CDK4/CCND1/ERBB2/AKT1	4
hsa-miR-34a-5p	R-HSA-69242	S Phase	0.00290611	0.013915	MYC/CDK4/CCNE2/CDC25A/CCND1/E2F1	6
hsa-miR-34a-5p	R-HSA-186763	Downstream signal transduction	0.00308981	0.0146164	PDGFRA/PDGFRB/SRC	3
hsa-miR-34a-5p	R-HSA-5688426	Deubiquitination	0.00323264	0.01511	MYC/CDC25A/AXIN2/YY1/MDM4/TP53/AR/SMAD4/BECN1	9
hsa-miR-34a-5p	R-HSA-8943724	Regulation of PTEN gene transcription	0.00339139	0.0156655	TP53/MTA2/HDAC1/SNAI1	4
hsa-miR-34a-5p	R-HSA-8941326	RUNX2 regulates bone development	0.00410256	0.0187302	AR/SRC/SMAD4	3
hsa-miR-34a-5p	R-HSA-110056	MAPK3 (ERK1) activation	0.00437862	0.019657	MAP2K1/IL6R	2
hsa-miR-34a-5p	R-HSA-1980145	Signaling by NOTCH2	0.00447974	0.019657	JAG1/DLL1/NOTCH2	3
hsa-miR-34a-5p	R-HSA-69563	p53-Dependent G1 DNA Damage Response	0.00450583	0.019657	CCNE2/MDM4/TP53/CDKN2A	4
hsa-miR-34a-5p	R-HSA-69580	p53-Dependent G1/S DNA damage checkpoint	0.00450583	0.019657	CCNE2/MDM4/TP53/CDKN2A	4
hsa-miR-34a-5p	R-HSA-936440	Negative regulators of DDX58/IFIH1 signaling	0.00487728	0.0210437	PCBP2/ATG5/NLRC5	3
hsa-miR-34a-5p	R-HSA-2559582	Senescence-Associated Secretory Phenotype (SASP)	0.00522595	0.0219718	CDK4/CDK6/CEBPB/CDKN2A/FOS	5
hsa-miR-34a-5p	R-HSA-389356	CD28 co-stimulation	0.00529547	0.0219718	SRC/RICTOR/AKT1	3
hsa-miR-34a-5p	R-HSA-68689	CDC6 association with the ORC:origin complex	0.00531623	0.0219718	E2F3/E2F1	2
hsa-miR-34a-5p	R-HSA-8934903	Receptor Mediated Mitophagy	0.00531623	0.0219718	SRC/ATG5	2
hsa-miR-34a-5p	R-HSA-400253	Circadian Clock	0.00555764	0.0227303	SIRT1/NAMPT/PPARA/PPP1CC	4
hsa-miR-34a-5p	R-HSA-1980148	Signaling by NOTCH3	0.00633728	0.0251335	JAG1/DLL1	2
hsa-miR-34a-5p	R-HSA-1980150	Signaling by NOTCH4	0.00633728	0.0251335	JAG1/DLL1	2
hsa-miR-34a-5p	R-HSA-4641265	Repression of WNT target genes	0.00633728	0.0251335	HDAC1/TCF7	2
hsa-miR-34a-5p	R-HSA-109581	Apoptosis	0.00729386	0.0283611	BCL2/E2F1/TP53/BAX/AKT1/HMGB1	6
hsa-miR-34a-5p	R-HSA-1358803	Downregulation of ERBB2:ERBB3 signaling	0.00744002	0.0283611	ERBB2/AKT1	2
hsa-miR-34a-5p	R-HSA-1502540	Signaling by Activin	0.00744002	0.0283611	INHBB/SMAD4	2
hsa-miR-34a-5p	R-HSA-350054	Notch-HLH transcription pathway	0.00744002	0.0283611	NOTCH1/NOTCH2	2
hsa-miR-34a-5p	R-HSA-373760	L1CAM interactions	0.0075146	0.0283699	MAP2K1/SRC/L1CAM/NUMB/ANK3	5
hsa-miR-34a-5p	R-HSA-5357801	Programmed Cell Death	0.00792876	0.0296484	BCL2/E2F1/TP53/BAX/AKT1/HMGB1	6
hsa-miR-34a-5p	R-HSA-6803205	TP53 regulates transcription of several additional cell d...	0.00862271	0.0313477	TP53/BIRC5	2
hsa-miR-34a-5p	R-HSA-6804759	Regulation of TP53 Activity through Association with Co-f...	0.00862271	0.0313477	TP53/AKT1	2
hsa-miR-34a-5p	R-HSA-8941856	RUNX3 regulates NOTCH signaling	0.00862271	0.0313477	JAG1/NOTCH1	2
hsa-miR-34a-5p	R-HSA-201681	TCF dependent signaling in response to WNT	0.00960495	0.0345982	MYC/WNT1/AXIN2/SOX2/HDAC1/TCF7/AKT1	7
hsa-miR-34a-5p	R-HSA-111447	Activation of BAD and translocation to mitochondria	0.00988364	0.0349606	BCL2/AKT1	2
hsa-miR-34a-5p	R-HSA-69298	Association of licensing factors with the pre-replicative...	0.00988364	0.0349606	E2F3/E2F1	2
hsa-miR-34a-5p	R-HSA-5633008	TP53 Regulates Transcription of Cell Death Genes	0.0100314	0.0351665	TP53/BIRC5/BAX	3
hsa-miR-34a-5p	R-HSA-8878171	Transcriptional regulation by RUNX1	0.0109496	0.0380457	MYB/CCND3/CDK6/CCND1/SPI1/HDAC1/SRC	7
hsa-miR-34a-5p	R-HSA-1362300	Transcription of E2F targets under negative control by p1...	0.0112211	0.038311	E2F1/HDAC1	2
hsa-miR-34a-5p	R-HSA-1433559	Regulation of KIT signaling	0.0112211	0.038311	SRC/KIT	2
hsa-miR-34a-5p	R-HSA-2122947	NOTCH1 Intracellular Domain Regulates Transcription	0.0120153	0.0406689	MYC/NOTCH1/HDAC1	3
hsa-miR-34a-5p	R-HSA-437239	Recycling pathway of L1	0.0127231	0.0426964	SRC/L1CAM/NUMB	3
hsa-miR-34a-5p	R-HSA-201722	Formation of the beta-catenin:TCF transactivating complex	0.0137797	0.045357	MYC/AXIN2/HDAC1/TCF7	4
hsa-miR-34a-5p	R-HSA-2980736	Peptide hormone metabolism	0.0137797	0.045357	VAMP2/STX1A/KLF4/INHBB	4
hsa-miR-34a-5p	R-HSA-6807070	PTEN Regulation	0.014028	0.045357	TP53/MTA2/HDAC1/SNAI1/AKT1	5
hsa-miR-34a-5p	R-HSA-1912420	Pre-NOTCH Processing in Golgi	0.0141191	0.045357	NOTCH1/NOTCH2	2
hsa-miR-34a-5p	R-HSA-6804114	TP53 Regulates Transcription of Genes Involved in G2 Cell...	0.0141191	0.045357	TP53/BAX	2
hsa-miR-34a-5p	R-HSA-1227986	Signaling by ERBB2	0.014209	0.045357	SRC/ERBB2/AKT1	3
hsa-miR-34a-5p	R-HSA-112310	Neurotransmitter release cycle	0.0149874	0.0474558	VAMP2/SYT1/STX1A	3
hsa-miR-34a-5p	R-HSA-6804760	Regulation of TP53 Activity through Methylation	0.0156764	0.0492405	MDM4/TP53	2
hsa-miR-34a-5p	R-HSA-3232118	SUMOylation of transcription factors	0.0173038	0.0530782	TP53/CDKN2A	2
hsa-miR-34a-5p	R-HSA-6803204	TP53 Regulates Transcription of Genes Involved in Cytochr...	0.0173038	0.0530782	TP53/BAX	2
hsa-miR-34a-5p	R-HSA-8876384	Listeria monocytogenes entry into host cells	0.0173038	0.0530782	MET/SRC	2
hsa-miR-34a-5p	R-HSA-445144	Signal transduction by L1	0.0189997	0.0573836	MAP2K1/L1CAM	2
hsa-miR-34a-5p	R-HSA-5218921	VEGFR2 mediated cell proliferation	0.0189997	0.0573836	VEGFA/SRC	2
hsa-miR-34a-5p	R-HSA-69541	Stabilization of p53	0.0201579	0.0604169	MDM4/TP53/CDKN2A	3
hsa-miR-34a-5p	R-HSA-389357	CD28 dependent PI3K/Akt signaling	0.0207625	0.0612933	RICTOR/AKT1	2
hsa-miR-34a-5p	R-HSA-389513	CTLA4 inhibitory signaling	0.0207625	0.0612933	SRC/AKT1	2
hsa-miR-34a-5p	R-HSA-186797	Signaling by PDGF	0.0211034	0.0618349	PDGFRA/PDGFRB/SRC	3
hsa-miR-34a-5p	R-HSA-187577	SCF(Skp2)-mediated degradation of p27/p21	0.0230667	0.0670868	CDK4/CCNE2/CCND1	3
hsa-miR-34a-5p	R-HSA-6802952	Signaling by BRAF and RAF fusions	0.0240844	0.0695316	MAP2K1/SRC/ATG7	3
hsa-miR-34a-5p	R-HSA-75876	Synthesis of very long-chain fatty acyl-CoAs	0.0244831	0.0696582	ACSL4/ACSL1	2
hsa-miR-34a-5p	R-HSA-8940973	RUNX2 regulates osteoblast differentiation	0.0244831	0.0696582	AR/SRC	2
hsa-miR-34a-5p	R-HSA-5673000	RAF activation	0.0264379	0.0741453	MAP2K1/SRC	2
hsa-miR-34a-5p	R-HSA-5674400	Constitutive Signaling by AKT1 E17K in Cancer	0.0264379	0.0741453	RICTOR/AKT1	2
hsa-miR-34a-5p	R-HSA-69620	Cell Cycle Checkpoints	0.0297882	0.0829489	CCNE2/CDC25A/MDM4/TP53/CDKN2A/BIRC5/PPP1CC	7
hsa-miR-34a-5p	R-HSA-1368082	RORA activates gene expression	0.0305292	0.0832411	SIRT1/PPARA	2
hsa-miR-34a-5p	R-HSA-354192	Integrin alphaIIb beta3 signaling	0.0305292	0.0832411	SRC/AKT1	2
hsa-miR-34a-5p	R-HSA-9006921	Integrin signaling	0.0305292	0.0832411	SRC/AKT1	2
hsa-miR-34a-5p	R-HSA-400685	Sema4D in semaphorin signaling	0.0326629	0.0872415	MET/ERBB2	2
hsa-miR-34a-5p	R-HSA-539107	Activation of E2F1 target genes at G1/S	0.0326629	0.0872415	E2F1/HDAC1	2
hsa-miR-34a-5p	R-HSA-69205	G1/S-Specific Transcription	0.0326629	0.0872415	E2F1/HDAC1	2
hsa-miR-34a-5p	R-HSA-264876	Insulin processing	0.0348535	0.0906265	VAMP2/STX1A	2
hsa-miR-34a-5p	R-HSA-5205647	Mitophagy	0.0348535	0.0906265	SRC/ATG5	2
hsa-miR-34a-5p	R-HSA-5218920	VEGFR2 mediated vascular permeability	0.0348535	0.0906265	RICTOR/AKT1	2
hsa-miR-34a-5p	R-HSA-8863795	Downregulation of ERBB2 signaling	0.0348535	0.0906265	ERBB2/AKT1	2
hsa-miR-34a-5p	R-HSA-388841	Costimulation by the CD28 family	0.0368576	0.0945876	SRC/RICTOR/AKT1	3
hsa-miR-34a-5p	R-HSA-3928663	EPHA-mediated growth cone collapse	0.0370996	0.0945876	EPHA5/SRC	2
hsa-miR-34a-5p	R-HSA-8874081	MET activates PTK2 signaling	0.0370996	0.0945876	MET/SRC	2
hsa-miR-34a-5p	R-HSA-3108232	SUMO E3 ligases SUMOylate target proteins	0.0385397	0.0976253	TP53/CDKN2A/HDAC1/BIRC5	4
hsa-miR-34a-5p	R-HSA-445095	Interaction between L1 and Ankyrins	0.0393999	0.0985329	L1CAM/ANK3	2
hsa-miR-34a-5p	R-HSA-5654733	Negative regulation of FGFR4 signaling	0.0393999	0.0985329	KLB/SRC	2
hsa-miR-34a-5p	R-HSA-2173789	TGF-beta receptor signaling activates SMADs	0.0417531	0.103757	SMAD4/PPP1CC	2
hsa-miR-34a-5p	R-HSA-6802957	Oncogenic MAPK signaling	0.043607	0.107682	MAP2K1/SRC/ATG7	3
hsa-miR-34a-5p	R-HSA-2990846	SUMOylation	0.0445207	0.109251	TP53/CDKN2A/HDAC1/BIRC5	4
hsa-miR-34a-5p	R-HSA-422356	Regulation of insulin secretion	0.0479328	0.116894	VAMP2/STX1A/CACNB3	3
hsa-miR-34a-5p	R-HSA-8953750	Transcriptional Regulation by E2F6	0.0491169	0.119042	E2F1/RAD51	2
hsa-miR-34a-5p	R-HSA-195721	Signaling by WNT	0.051113	0.12312	MYC/WNT1/AXIN2/SOX2/HDAC1/TCF7/AKT1	7
hsa-miR-34a-5p	R-HSA-6802948	Signaling by high-kinase activity BRAF mutants	0.0516688	0.1237	MAP2K1/SRC	2
hsa-miR-34a-5p	R-HSA-75105	Fatty acyl-CoA biosynthesis	0.0542674	0.129134	ACSL4/ACSL1	2
hsa-miR-34a-5p	R-HSA-2129379	Molecules associated with elastic fibres	0.0569113	0.132868	BMP7/GDF5	2
hsa-miR-34a-5p	R-HSA-168142	Toll Like Receptor 10 (TLR10) Cascade	0.0571904	0.132868	MAP2K1/FOS/HMGB1	3
hsa-miR-34a-5p	R-HSA-168176	Toll Like Receptor 5 (TLR5) Cascade	0.0571904	0.132868	MAP2K1/FOS/HMGB1	3
hsa-miR-34a-5p	R-HSA-975871	MyD88 cascade initiated on plasma membrane	0.0571904	0.132868	MAP2K1/FOS/HMGB1	3
hsa-miR-34a-5p	R-HSA-390471	Association of TriC/CCT with target proteins during biosy...	0.0595994	0.136846	CCNE2/TP53	2
hsa-miR-34a-5p	R-HSA-76009	Platelet Aggregation (Plug Formation)	0.0595994	0.136846	SRC/AKT1	2
hsa-miR-34a-5p	R-HSA-6794362	Protein-protein interactions at synapses	0.0604517	0.137996	SYT1/STX1A/FLOT2	3
hsa-miR-34a-5p	R-HSA-5674135	MAP2K and MAPK activation	0.0623307	0.139846	MAP2K1/SRC	2
hsa-miR-34a-5p	R-HSA-6802946	Signaling by moderate kinase activity BRAF mutants	0.0623307	0.139846	MAP2K1/SRC	2
hsa-miR-34a-5p	R-HSA-6802955	Paradoxical activation of RAF signaling by kinase inactiv...	0.0623307	0.139846	MAP2K1/SRC	2
hsa-miR-34a-5p	R-HSA-5654743	Signaling by FGFR4	0.0651039	0.144417	KLB/SRC	2
hsa-miR-34a-5p	R-HSA-8875878	MET promotes cell motility	0.0651039	0.144417	MET/SRC	2
hsa-miR-34a-5p	R-HSA-975138	TRAF6 mediated induction of NFkB and MAP kinases upon TLR...	0.0707442	0.154373	MAP2K1/FOS/HMGB1	3
hsa-miR-34a-5p	R-HSA-1296072	Voltage gated Potassium channels	0.0707716	0.154373	KCNH1/KCNH2	2
hsa-miR-34a-5p	R-HSA-1433557	Signaling by SCF-KIT	0.0707716	0.154373	SRC/KIT	2
hsa-miR-34a-5p	R-HSA-166058	MyD88:Mal cascade initiated on plasma membrane	0.0743401	0.158632	MAP2K1/FOS/HMGB1	3
hsa-miR-34a-5p	R-HSA-168181	Toll Like Receptor 7/8 (TLR7/8) Cascade	0.0743401	0.158632	MAP2K1/FOS/HMGB1	3
hsa-miR-34a-5p	R-HSA-168188	Toll Like Receptor TLR6:TLR2 Cascade	0.0743401	0.158632	MAP2K1/FOS/HMGB1	3
hsa-miR-34a-5p	R-HSA-975155	MyD88 dependent cascade initiated on endosome	0.0743401	0.158632	MAP2K1/FOS/HMGB1	3
hsa-miR-34a-5p	R-HSA-1566948	Elastic fibre formation	0.076594	0.162558	BMP7/GDF5	2
hsa-miR-34a-5p	R-HSA-168179	Toll Like Receptor TLR1:TLR2 Cascade	0.0798837	0.166834	MAP2K1/FOS/HMGB1	3
hsa-miR-34a-5p	R-HSA-181438	Toll Like Receptor 2 (TLR2) Cascade	0.0798837	0.166834	MAP2K1/FOS/HMGB1	3
hsa-miR-34a-5p	R-HSA-8856825	Cargo recognition for clathrin-mediated endocytosis	0.0798837	0.166834	VAMP2/SYT1/AGTR1	3
hsa-miR-34a-5p	R-HSA-168138	Toll Like Receptor 9 (TLR9) Cascade	0.0817708	0.168837	MAP2K1/FOS/HMGB1	3
hsa-miR-34a-5p	R-HSA-112316	Neuronal System	0.0820865	0.168837	VAMP2/SYT1/STX1A/KCNH1/CACNB3/KCNH2/FLOT2	7
hsa-miR-34a-5p	R-HSA-1368108	BMAL1:CLOCK,NPAS2 activates circadian gene expression	0.0825625	0.168837	NAMPT/PPARA	2
hsa-miR-34a-5p	R-HSA-73762	RNA Polymerase I Transcription Initiation	0.0825625	0.168837	MTA2/HDAC1	2
hsa-miR-34a-5p	R-HSA-168164	Toll Like Receptor 3 (TLR3) Cascade	0.0836771	0.170229	MAP2K1/FOS/HMGB1	3
hsa-miR-34a-5p	R-HSA-392451	G beta:gamma signalling through PI3Kgamma	0.085599	0.171481	PIK3CG/AKT1	2
hsa-miR-34a-5p	R-HSA-166166	MyD88-independent TLR4 cascade	0.0856025	0.171481	MAP2K1/FOS/HMGB1	3
hsa-miR-34a-5p	R-HSA-937061	TRIF(TICAM1)-mediated TLR4 signaling	0.0856025	0.171481	MAP2K1/FOS/HMGB1	3
hsa-miR-34a-5p	R-HSA-3928665	EPH-ephrin mediated repulsion of cells	0.0949055	0.186315	EPHA5/SRC	2
hsa-miR-34a-5p	R-HSA-397795	G-protein beta:gamma signalling	0.0949055	0.186315	PIK3CG/AKT1	2
hsa-miR-34a-5p	R-HSA-69229	Ubiquitin-dependent degradation of Cyclin D1	0.0949055	0.186315	CDK4/CCND1	2
hsa-miR-34a-5p	R-HSA-75815	Ubiquitin-dependent degradation of Cyclin D	0.0949055	0.186315	CDK4/CCND1	2
hsa-miR-34a-5p	R-HSA-418886	Netrin mediated repulsion signals	0.0972813	0.186321	SRC	1
hsa-miR-34a-5p	R-HSA-428542	Regulation of commissural axon pathfinding by SLIT and ROBO	0.0972813	0.186321	SRC	1
hsa-miR-34a-5p	R-HSA-450341	Activation of the AP-1 family of transcription factors	0.0972813	0.186321	FOS	1
hsa-miR-34a-5p	R-HSA-8875656	MET receptor recycling	0.0972813	0.186321	MET	1
hsa-miR-34a-5p	R-HSA-975578	Reactions specific to the complex N-glycan synthesis pathway	0.0972813	0.186321	FUT8	1
hsa-miR-34a-5p	R-HSA-983231	Factors involved in megakaryocyte development and platele...	0.0998697	0.190349	MYB/IFNB1/TP53/HDAC1	4
hsa-miR-34a-5p	R-HSA-6802949	Signaling by RAS mutants	0.101264	0.191916	MAP2K1/SRC	2
hsa-miR-34a-5p	R-HSA-163685	Integration of energy metabolism	0.101669	0.191916	VAMP2/STX1A/CACNB3	3
hsa-miR-34a-5p	R-HSA-1234158	Regulation of gene expression by Hypoxia-inducible Factor	0.106478	0.197201	VEGFA	1
hsa-miR-34a-5p	R-HSA-180292	GAB1 signalosome	0.106478	0.197201	SRC	1
hsa-miR-34a-5p	R-HSA-8851805	MET activates RAS signaling	0.106478	0.197201	MET	1
hsa-miR-34a-5p	R-HSA-8875555	MET activates RAP1 and RAC1	0.106478	0.197201	MET	1
hsa-miR-34a-5p	R-HSA-8941858	Regulation of RUNX3 expression and activity	0.107738	0.198599	CDKN2A/SRC	2
hsa-miR-34a-5p	R-HSA-114604	GPVI-mediated activation cascade	0.111016	0.200801	PIK3CG/AKT1	2
hsa-miR-34a-5p	R-HSA-6794361	Neurexins and neuroligins	0.11432	0.200801	SYT1/STX1A	2
hsa-miR-34a-5p	R-HSA-1474151	Tetrahydrobiopterin (BH4) synthesis, recycling, salvage a...	0.115581	0.200801	AKT1	1
hsa-miR-34a-5p	R-HSA-2029481	FCGR activation	0.115581	0.200801	SRC	1
hsa-miR-34a-5p	R-HSA-203615	eNOS activation	0.115581	0.200801	AKT1	1
hsa-miR-34a-5p	R-HSA-209822	Glycoprotein hormones	0.115581	0.200801	INHBB	1
hsa-miR-34a-5p	R-HSA-210990	PECAM1 interactions	0.115581	0.200801	SRC	1
hsa-miR-34a-5p	R-HSA-2160916	Hyaluronan uptake and degradation	0.115581	0.200801	CD44	1
hsa-miR-34a-5p	R-HSA-2197563	NOTCH2 intracellular domain regulates transcription	0.115581	0.200801	NOTCH2	1
hsa-miR-34a-5p	R-HSA-430116	GP1b-IX-V activation signalling	0.115581	0.200801	SRC	1
hsa-miR-34a-5p	R-HSA-6803207	TP53 Regulates Transcription of Caspase Activators and Ca...	0.115581	0.200801	TP53	1
hsa-miR-34a-5p	R-HSA-6803211	TP53 Regulates Transcription of Death Receptors and Ligands	0.115581	0.200801	TP53	1
hsa-miR-34a-5p	R-HSA-73817	Purine ribonucleoside monophosphate biosynthesis	0.115581	0.200801	IMPDH2	1
hsa-miR-34a-5p	R-HSA-166054	Activated TLR4 signalling	0.116637	0.201742	MAP2K1/FOS/HMGB1	3
hsa-miR-34a-5p	R-HSA-112308	Presynaptic depolarization and calcium channel opening	0.124593	0.204683	CACNB3	1
hsa-miR-34a-5p	R-HSA-113501	Inhibition of replication initiation of damaged DNA by RB...	0.124593	0.204683	E2F1	1
hsa-miR-34a-5p	R-HSA-140342	Apoptosis induced DNA fragmentation	0.124593	0.204683	HMGB1	1
hsa-miR-34a-5p	R-HSA-171007	p38MAPK events	0.124593	0.204683	SRC	1
hsa-miR-34a-5p	R-HSA-2046104	alpha-linolenic (omega3) and linoleic (omega6) acid metab...	0.124593	0.204683	ACSL1	1
hsa-miR-34a-5p	R-HSA-2046106	alpha-linolenic acid (ALA) metabolism	0.124593	0.204683	ACSL1	1
hsa-miR-34a-5p	R-HSA-211227	Activation of DNA fragmentation factor	0.124593	0.204683	HMGB1	1
hsa-miR-34a-5p	R-HSA-3134963	DEx/H-box helicases activate type I IFN and inflammatory ...	0.124593	0.204683	HMGB1	1
hsa-miR-34a-5p	R-HSA-5210891	Uptake and function of anthrax toxins	0.124593	0.204683	MAP2K1	1
hsa-miR-34a-5p	R-HSA-5668599	RHO GTPases Activate NADPH Oxidases	0.124593	0.204683	CYBB	1
hsa-miR-34a-5p	R-HSA-879415	Advanced glycosylation endproduct receptor signaling	0.124593	0.204683	HMGB1	1
hsa-miR-34a-5p	R-HSA-8847993	ERBB2 Activates PTK6 Signaling	0.124593	0.204683	ERBB2	1
hsa-miR-34a-5p	R-HSA-1855183	Synthesis of IP2, IP, and Ins in the cytosol	0.133514	0.213097	IMPA1	1
hsa-miR-34a-5p	R-HSA-190322	FGFR4 ligand binding and activation	0.133514	0.213097	KLB	1
hsa-miR-34a-5p	R-HSA-198323	AKT phosphorylates targets in the cytosol	0.133514	0.213097	AKT1	1
hsa-miR-34a-5p	R-HSA-209952	Peptide hormone biosynthesis	0.133514	0.213097	INHBB	1
hsa-miR-34a-5p	R-HSA-418885	DCC mediated attractive signaling	0.133514	0.213097	SRC	1
hsa-miR-34a-5p	R-HSA-5682910	LGI-ADAM interactions	0.133514	0.213097	STX1A	1
hsa-miR-34a-5p	R-HSA-918233	TRAF3-dependent IRF activation pathway	0.133514	0.213097	IFNB1	1
hsa-miR-34a-5p	R-HSA-450294	MAP kinase activation in TLR cascade	0.138108	0.219537	MAP2K1/FOS	2
hsa-miR-34a-5p	R-HSA-375165	NCAM signaling for neurite out-growth	0.141591	0.220036	SRC/CACNB3	2
hsa-miR-34a-5p	R-HSA-354194	GRB2:SOS provides linkage to MAPK signaling for Integrins	0.142345	0.220036	SRC	1
hsa-miR-34a-5p	R-HSA-372708	p130Cas linkage to MAPK signaling for integrins	0.142345	0.220036	SRC	1
hsa-miR-34a-5p	R-HSA-5654228	Phospholipase C-mediated cascade; FGFR4	0.142345	0.220036	KLB	1
hsa-miR-34a-5p	R-HSA-6785631	ERBB2 Regulates Cell Motility	0.142345	0.220036	ERBB2	1
hsa-miR-34a-5p	R-HSA-8875360	InlB-mediated entry of Listeria monocytogenes into host cell	0.142345	0.220036	MET	1
hsa-miR-34a-5p	R-HSA-8956320	Nucleobase biosynthesis	0.142345	0.220036	IMPDH2	1
hsa-miR-34a-5p	R-HSA-453274	Mitotic G2-G2/M phases	0.14298	0.220151	CDC25A/E2F3/E2F1/TP53	4
hsa-miR-34a-5p	R-HSA-3906995	Diseases associated with O-glycosylation of proteins	0.145093	0.222078	NOTCH1/NOTCH2	2
hsa-miR-34a-5p	R-HSA-3247509	Chromatin modifying enzymes	0.148673	0.222078	CDK4/CCND1/MTA2/HDAC1/KDM4A	5
hsa-miR-34a-5p	R-HSA-4839726	Chromatin organization	0.148673	0.222078	CDK4/CCND1/MTA2/HDAC1/KDM4A	5
hsa-miR-34a-5p	R-HSA-166016	Toll Like Receptor 4 (TLR4) Cascade	0.148818	0.222078	MAP2K1/FOS/HMGB1	3
hsa-miR-34a-5p	R-HSA-1295596	Spry regulation of FGF signaling	0.151086	0.222078	SRC	1
hsa-miR-34a-5p	R-HSA-156711	Polo-like kinase mediated events	0.151086	0.222078	CDC25A	1
hsa-miR-34a-5p	R-HSA-1963640	GRB2 events in ERBB2 signaling	0.151086	0.222078	ERBB2	1
hsa-miR-34a-5p	R-HSA-1963642	PI3K events in ERBB2 signaling	0.151086	0.222078	ERBB2	1
hsa-miR-34a-5p	R-HSA-2559584	Formation of Senescence-Associated Heterochromatin Foci (...	0.151086	0.222078	TP53	1
hsa-miR-34a-5p	R-HSA-391160	Signal regulatory protein family interactions	0.151086	0.222078	SRC	1
hsa-miR-34a-5p	R-HSA-5684264	MAP3K8 (TPL2)-dependent MAPK1/3 activation	0.151086	0.222078	MAP2K1	1
hsa-miR-34a-5p	R-HSA-373755	Semaphorin interactions	0.15215	0.222078	MET/ERBB2	2
hsa-miR-34a-5p	R-HSA-6796648	TP53 Regulates Transcription of DNA Repair Genes	0.15215	0.222078	TP53/FOS	2
hsa-miR-34a-5p	R-HSA-68867	Assembly of the pre-replicative complex	0.15215	0.222078	E2F3/E2F1	2
hsa-miR-34a-5p	R-HSA-2142845	Hyaluronan metabolism	0.15974	0.229739	CD44	1
hsa-miR-34a-5p	R-HSA-450385	Butyrate Response Factor 1 (BRF1) binds and destabilizes ...	0.15974	0.229739	AKT1	1
hsa-miR-34a-5p	R-HSA-450604	KSRP (KHSRP) binds and destabilizes mRNA	0.15974	0.229739	AKT1	1
hsa-miR-34a-5p	R-HSA-622312	Inflammasomes	0.15974	0.229739	BCL2	1
hsa-miR-34a-5p	R-HSA-202733	Cell surface interactions at the vascular wall	0.163409	0.234159	CD44/SRC/L1CAM	3
hsa-miR-34a-5p	R-HSA-448424	Interleukin-17 signaling	0.16646	0.237663	MAP2K1/FOS	2
hsa-miR-34a-5p	R-HSA-163210	Formation of ATP by chemiosmotic coupling	0.168306	0.237791	ATP5S	1
hsa-miR-34a-5p	R-HSA-5635838	Activation of SMO	0.168306	0.237791	GAS1	1
hsa-miR-34a-5p	R-HSA-8856828	Clathrin-mediated endocytosis	0.168366	0.237791	VAMP2/SYT1/AGTR1	3
hsa-miR-34a-5p	R-HSA-5576891	Cardiac conduction	0.173367	0.243105	CACNB3/KCNH2/FKBP1B	3
hsa-miR-34a-5p	R-HSA-5663220	RHO GTPases Activate Formins	0.173367	0.243105	BIRC5/SRC/PPP1CC	3
hsa-miR-34a-5p	R-HSA-197264	Nicotinamide salvaging	0.176785	0.244406	NAMPT	1
hsa-miR-34a-5p	R-HSA-3928664	Ephrin signaling	0.176785	0.244406	SRC	1
hsa-miR-34a-5p	R-HSA-422085	Synthesis, secretion, and deacylation of Ghrelin	0.176785	0.244406	KLF4	1
hsa-miR-34a-5p	R-HSA-5686938	Regulation of TLR by endogenous ligand	0.176785	0.244406	HMGB1	1
hsa-miR-34a-5p	R-HSA-427389	ERCC6 (CSB) and EHMT2 (G9a) positively regulate rRNA expr...	0.180993	0.247609	MTA2/HDAC1	2
hsa-miR-34a-5p	R-HSA-5693565	Recruitment and ATM-mediated phosphorylation of repair an...	0.180993	0.247609	TP53/KDM4A	2
hsa-miR-34a-5p	R-HSA-69304	Regulation of DNA replication	0.180993	0.247609	E2F3/E2F1	2
hsa-miR-34a-5p	R-HSA-5693606	DNA Double Strand Break Response	0.184657	0.248997	TP53/KDM4A	2
hsa-miR-34a-5p	R-HSA-1181150	Signaling by NODAL	0.185179	0.248997	SMAD4	1
hsa-miR-34a-5p	R-HSA-167044	Signalling to RAS	0.185179	0.248997	SRC	1
hsa-miR-34a-5p	R-HSA-5654719	SHC-mediated cascade:FGFR4	0.185179	0.248997	KLB	1
hsa-miR-34a-5p	R-HSA-5654720	PI-3K cascade:FGFR4	0.185179	0.248997	KLB	1
hsa-miR-34a-5p	R-HSA-212165	Epigenetic regulation of gene expression	0.188618	0.252756	SIRT1/MTA2/HDAC1	3
hsa-miR-34a-5p	R-HSA-3214858	RMTs methylate histone arginines	0.192016	0.254931	CDK4/CCND1	2
hsa-miR-34a-5p	R-HSA-6806834	Signaling by MET	0.192016	0.254931	MET/SRC	2
hsa-miR-34a-5p	R-HSA-6804115	TP53 regulates transcription of additional cell cycle gen...	0.193488	0.254931	TP53	1
hsa-miR-34a-5p	R-HSA-6807004	Negative regulation of MET activity	0.193488	0.254931	MET	1
hsa-miR-34a-5p	R-HSA-8849932	Synaptic adhesion-like molecules	0.193488	0.254931	FLOT2	1
hsa-miR-34a-5p	R-HSA-2559586	DNA Damage/Telomere Stress Induced Senescence	0.195711	0.256997	CCNE2/TP53	2
hsa-miR-34a-5p	R-HSA-5663205	Infectious disease	0.196674	0.257139	MET/VAMP2/MAP2K1/SYT1/STX1A/SRC	6
hsa-miR-34a-5p	R-HSA-112315	Transmission across Chemical Synapses	0.198372	0.257139	VAMP2/SYT1/STX1A/CACNB3	4
hsa-miR-34a-5p	R-HSA-113510	E2F mediated regulation of DNA replication	0.201713	0.257139	E2F1	1
hsa-miR-34a-5p	R-HSA-1250196	SHC1 events in ERBB2 signaling	0.201713	0.257139	ERBB2	1
hsa-miR-34a-5p	R-HSA-202131	Metabolism of nitric oxide	0.201713	0.257139	AKT1	1
hsa-miR-34a-5p	R-HSA-203765	eNOS activation and regulation	0.201713	0.257139	AKT1	1
hsa-miR-34a-5p	R-HSA-5205685	Pink/Parkin Mediated Mitophagy	0.201713	0.257139	ATG5	1
hsa-miR-34a-5p	R-HSA-5654712	FRS-mediated FGFR4 signaling	0.201713	0.257139	KLB	1
hsa-miR-34a-5p	R-HSA-8951671	RUNX3 regulates YAP1-mediated transcription	0.201713	0.257139	PPARA	1
hsa-miR-34a-5p	R-HSA-1445148	Translocation of GLUT4 to the plasma membrane	0.203126	0.257271	VAMP2/AKT1	2
hsa-miR-34a-5p	R-HSA-195253	Degradation of beta-catenin by the destruction complex	0.203126	0.257271	HDAC1/TCF7	2
hsa-miR-34a-5p	R-HSA-1810476	RIP-mediated NFkB activation via ZBP1	0.209855	0.263245	HMGB1	1
hsa-miR-34a-5p	R-HSA-8862803	Deregulated CDK5 triggers multiple neurodegenerative path...	0.209855	0.263245	CDC25A	1
hsa-miR-34a-5p	R-HSA-8863678	Neurodegenerative Diseases	0.209855	0.263245	CDC25A	1
hsa-miR-34a-5p	R-HSA-5632684	Hedgehog 'on' state	0.214309	0.265996	GAS1/NUMB	2
hsa-miR-34a-5p	R-HSA-68874	M/G1 Transition	0.214309	0.265996	E2F3/E2F1	2
hsa-miR-34a-5p	R-HSA-69002	DNA Replication Pre-Initiation	0.214309	0.265996	E2F3/E2F1	2
hsa-miR-34a-5p	R-HSA-168898	Toll-Like Receptors Cascades	0.214758	0.265996	MAP2K1/FOS/HMGB1	3
hsa-miR-34a-5p	R-HSA-163560	Triglyceride catabolism	0.217914	0.267541	PPP1CC	1
hsa-miR-34a-5p	R-HSA-6783589	Interleukin-6 family signaling	0.217914	0.267541	IL6R	1
hsa-miR-34a-5p	R-HSA-5628897	TP53 Regulates Metabolic Genes	0.21805	0.267541	TP53/AKT1	2
hsa-miR-34a-5p	R-HSA-190236	Signaling by FGFR	0.221796	0.270448	KLB/SRC	2
hsa-miR-34a-5p	R-HSA-912446	Meiotic recombination	0.221796	0.270448	CDK4/RAD51	2
hsa-miR-34a-5p	R-HSA-195258	RHO GTPase Effectors	0.22305	0.271135	AR/BIRC5/SRC/CYBB/PPP1CC	5
hsa-miR-34a-5p	R-HSA-210991	Basigin interactions	0.225892	0.271231	L1CAM	1
hsa-miR-34a-5p	R-HSA-416572	Sema4D induced cell migration and growth-cone collapse	0.225892	0.271231	ERBB2	1
hsa-miR-34a-5p	R-HSA-418592	ADP signalling through P2Y purinoceptor 1	0.225892	0.271231	SRC	1
hsa-miR-34a-5p	R-HSA-69273	Cyclin A/B1/B2 associated events during G2/M transition	0.225892	0.271231	CDC25A	1
hsa-miR-34a-5p	R-HSA-5687128	MAPK6/MAPK4 signaling	0.229306	0.27449	MYC/CCND3	2
hsa-miR-34a-5p	R-HSA-2173788	Downregulation of TGF-beta receptor signaling	0.23379	0.27483	PPP1CC	1
hsa-miR-34a-5p	R-HSA-3238698	WNT ligand biogenesis and trafficking	0.23379	0.27483	WNT1	1
hsa-miR-34a-5p	R-HSA-5693554	Resolution of D-loop Structures through Synthesis-Depende...	0.23379	0.27483	RAD51	1
hsa-miR-34a-5p	R-HSA-912694	Regulation of IFNA signaling	0.23379	0.27483	IFNB1	1
hsa-miR-34a-5p	R-HSA-933542	TRAF6 mediated NF-kB activation	0.23379	0.27483	HMGB1	1
hsa-miR-34a-5p	R-HSA-975576	N-glycan antennae elongation in the medial/trans-Golgi	0.23379	0.27483	FUT8	1
hsa-miR-34a-5p	R-HSA-6804756	Regulation of TP53 Activity through Phosphorylation	0.236833	0.277576	MDM4/TP53	2
hsa-miR-34a-5p	R-HSA-5693532	DNA Double-Strand Break Repair	0.238908	0.279008	TP53/KDM4A/RAD51	3
hsa-miR-34a-5p	R-HSA-2682334	EPH-Ephrin signaling	0.240602	0.279008	EPHA5/SRC	2
hsa-miR-34a-5p	R-HSA-1606322	ZBP1(DAI) mediated induction of type I IFNs	0.241608	0.279008	HMGB1	1
hsa-miR-34a-5p	R-HSA-5576893	Phase 2 - plateau phase	0.241608	0.279008	CACNB3	1
hsa-miR-34a-5p	R-HSA-5654716	Downstream signaling of activated FGFR4	0.241608	0.279008	KLB	1
hsa-miR-34a-5p	R-HSA-3214815	HDACs deacetylate histones	0.248148	0.284597	MTA2/HDAC1	2
hsa-miR-34a-5p	R-HSA-201451	Signaling by BMP	0.249346	0.284597	SMAD4	1
hsa-miR-34a-5p	R-HSA-400042	Adrenaline,noradrenaline inhibits insulin secretion	0.249346	0.284597	CACNB3	1
hsa-miR-34a-5p	R-HSA-70268	Pyruvate metabolism	0.249346	0.284597	LDHA	1
hsa-miR-34a-5p	R-HSA-1592230	Mitochondrial biogenesis	0.251925	0.286706	PPARA/ATP5S	2
hsa-miR-34a-5p	R-HSA-141424	Amplification of signal from the kinetochores	0.255703	0.288311	BIRC5/PPP1CC	2
hsa-miR-34a-5p	R-HSA-141444	Amplification of signal from unattached kinetochores vi...	0.255703	0.288311	BIRC5/PPP1CC	2
hsa-miR-34a-5p	R-HSA-390466	Chaperonin-mediated protein folding	0.255703	0.288311	CCNE2/TP53	2
hsa-miR-34a-5p	R-HSA-2032785	YAP1- and WWTR1 (TAZ)-stimulated gene expression	0.257007	0.288311	PPARA	1
hsa-miR-34a-5p	R-HSA-5654732	Negative regulation of FGFR3 signaling	0.257007	0.288311	SRC	1
hsa-miR-34a-5p	R-HSA-1296071	Potassium Channels	0.267045	0.298718	KCNH1/KCNH2	2
hsa-miR-34a-5p	R-HSA-187687	Signalling to ERKs	0.272096	0.300094	SRC	1
hsa-miR-34a-5p	R-HSA-196807	Nicotinate metabolism	0.272096	0.300094	NAMPT	1
hsa-miR-34a-5p	R-HSA-450282	MAPK targets/ Nuclear events mediated by MAP kinases	0.272096	0.300094	FOS	1
hsa-miR-34a-5p	R-HSA-4641262	Disassembly of the destruction complex and recruitment of...	0.272096	0.300094	WNT1	1
hsa-miR-34a-5p	R-HSA-8949613	Cristae formation	0.272096	0.300094	ATP5S	1
hsa-miR-34a-5p	R-HSA-391251	Protein folding	0.278386	0.304019	CCNE2/TP53	2
hsa-miR-34a-5p	R-HSA-1222556	ROS, RNS production in phagocytes	0.279527	0.304019	CYBB	1
hsa-miR-34a-5p	R-HSA-2871796	FCERI mediated MAPK activation	0.279527	0.304019	FOS	1
hsa-miR-34a-5p	R-HSA-392518	Signal amplification	0.279527	0.304019	SRC	1
hsa-miR-34a-5p	R-HSA-456926	Thrombin signalling through proteinase activated receptor...	0.279527	0.304019	SRC	1
hsa-miR-34a-5p	R-HSA-5654726	Negative regulation of FGFR1 signaling	0.286882	0.309448	SRC	1
hsa-miR-34a-5p	R-HSA-5693568	Resolution of D-loop Structures through Holliday Junction...	0.286882	0.309448	RAD51	1
hsa-miR-34a-5p	R-HSA-933541	TRAF6 mediated IRF7 activation	0.286882	0.309448	IFNB1	1
hsa-miR-34a-5p	R-HSA-5250913	Positive epigenetic regulation of rRNA expression	0.293492	0.314707	MTA2/HDAC1	2
hsa-miR-34a-5p	R-HSA-5654727	Negative regulation of FGFR2 signaling	0.294163	0.314707	SRC	1
hsa-miR-34a-5p	R-HSA-5693537	Resolution of D-Loop Structures	0.294163	0.314707	RAD51	1
hsa-miR-34a-5p	R-HSA-69306	DNA Replication	0.301032	0.319804	E2F3/E2F1	2
hsa-miR-34a-5p	R-HSA-432720	Lysosome Vesicle Biogenesis	0.30137	0.319804	VAMP2	1
hsa-miR-34a-5p	R-HSA-445989	TAK1 activates NFkB by phosphorylation and activation of ...	0.30137	0.319804	HMGB1	1
hsa-miR-34a-5p	R-HSA-5250941	Negative epigenetic regulation of rRNA expression	0.304797	0.321701	SIRT1/HDAC1	2
hsa-miR-34a-5p	R-HSA-73854	RNA Polymerase I Promoter Clearance	0.304797	0.321701	MTA2/HDAC1	2
hsa-miR-34a-5p	R-HSA-176187	Activation of ATR in response to replication stress	0.315567	0.328304	CDC25A	1
hsa-miR-34a-5p	R-HSA-3299685	Detoxification of Reactive Oxygen Species	0.315567	0.328304	CYBB	1
hsa-miR-34a-5p	R-HSA-5685938	HDR through Single Strand Annealing (SSA)	0.315567	0.328304	RAD51	1
hsa-miR-34a-5p	R-HSA-8979227	Triglyceride metabolism	0.315567	0.328304	PPP1CC	1
hsa-miR-34a-5p	R-HSA-69618	Mitotic Spindle Checkpoint	0.31607	0.328304	BIRC5/PPP1CC	2
hsa-miR-34a-5p	R-HSA-73864	RNA Polymerase I Transcription	0.31607	0.328304	MTA2/HDAC1	2
hsa-miR-34a-5p	R-HSA-76002	Platelet activation, signaling and aggregation	0.318485	0.32994	VEGFA/SRC/PIK3CG/AKT1	4
hsa-miR-34a-5p	R-HSA-5689896	Ovarian tumor domain proteases	0.322557	0.332405	TP53	1
hsa-miR-34a-5p	R-HSA-5696394	DNA Damage Recognition in GG-NER	0.322557	0.332405	YY1	1
hsa-miR-34a-5p	R-HSA-5693616	Presynaptic phase of homologous DNA pairing and strand ex...	0.329477	0.338647	RAD51	1
hsa-miR-34a-5p	R-HSA-5654741	Signaling by FGFR3	0.336327	0.342994	SRC	1
hsa-miR-34a-5p	R-HSA-5675221	Negative regulation of MAPK pathway	0.336327	0.342994	MAP2K1	1
hsa-miR-34a-5p	R-HSA-8950505	Gene and protein expression by JAK-STAT signaling after I...	0.336327	0.342994	AIP	1
hsa-miR-34a-5p	R-HSA-1500620	Meiosis	0.342206	0.345423	CDK4/RAD51	2
hsa-miR-34a-5p	R-HSA-1989781	PPARA activates gene expression	0.342206	0.345423	ACSL1/PPARA	2
hsa-miR-34a-5p	R-HSA-109704	PI3K Cascade	0.343108	0.345423	KLB	1
hsa-miR-34a-5p	R-HSA-165159	mTOR signalling	0.343108	0.345423	AKT1	1
hsa-miR-34a-5p	R-HSA-8853659	RET signaling	0.343108	0.345423	SRC	1
hsa-miR-34a-5p	R-HSA-397014	Muscle contraction	0.349819	0.347722	CACNB3/KCNH2/FKBP1B	3
hsa-miR-34a-5p	R-HSA-2426168	Activation of gene expression by SREBF (SREBP)	0.34982	0.347722	PPARA	1
hsa-miR-34a-5p	R-HSA-3928662	EPHB-mediated forward signaling	0.34982	0.347722	SRC	1
hsa-miR-34a-5p	R-HSA-419037	NCAM1 interactions	0.34982	0.347722	CACNB3	1
hsa-miR-34a-5p	R-HSA-5693579	Homologous DNA Pairing and Strand Exchange	0.34982	0.347722	RAD51	1
hsa-miR-34a-5p	R-HSA-400206	Regulation of lipid metabolism by Peroxisome proliferator...	0.353317	0.350312	ACSL1/PPARA	2
hsa-miR-34a-5p	R-HSA-177929	Signaling by EGFR	0.356464	0.351309	SRC	1
hsa-miR-34a-5p	R-HSA-975634	Retinoid metabolism and transport	0.356464	0.351309	RBP2	1
hsa-miR-34a-5p	R-HSA-446652	Interleukin-1 family signaling	0.357007	0.351309	MAP2K1/HMGB1	2
hsa-miR-34a-5p	R-HSA-1660661	Sphingolipid de novo biosynthesis	0.36304	0.355464	PRKD1	1
hsa-miR-34a-5p	R-HSA-4615885	SUMOylation of DNA replication proteins	0.36304	0.355464	BIRC5	1
hsa-miR-34a-5p	R-HSA-112399	IRS-mediated signalling	0.36955	0.360938	KLB	1
hsa-miR-34a-5p	R-HSA-2500257	Resolution of Sister Chromatid Cohesion	0.37169	0.362127	BIRC5/PPP1CC	2
hsa-miR-34a-5p	R-HSA-1266695	Interleukin-7 signaling	0.375995	0.364512	BECN1	1
hsa-miR-34a-5p	R-HSA-5576892	Phase 0 - rapid depolarisation	0.375995	0.364512	CACNB3	1
hsa-miR-34a-5p	R-HSA-6806667	Metabolism of fat-soluble vitamins	0.382374	0.369109	RBP2	1
hsa-miR-34a-5p	R-HSA-8939236	RUNX1 regulates transcription of genes involved in differ...	0.382617	0.369109	MYB/SPI1	2
hsa-miR-34a-5p	R-HSA-2428928	IRS-related events triggered by IGF1R	0.394938	0.378208	KLB	1
hsa-miR-34a-5p	R-HSA-6783783	Interleukin-10 signaling	0.394938	0.378208	CCL22	1
hsa-miR-34a-5p	R-HSA-71406	Pyruvate metabolism and Citric Acid (TCA) cycle	0.394938	0.378208	LDHA	1
hsa-miR-34a-5p	R-HSA-3781865	Diseases of glycosylation	0.400648	0.37853	NOTCH1/NOTCH2	2
hsa-miR-34a-5p	R-HSA-1483249	Inositol phosphate metabolism	0.401125	0.37853	IMPA1	1
hsa-miR-34a-5p	R-HSA-157858	Gap junction trafficking and regulation	0.401125	0.37853	SRC	1
hsa-miR-34a-5p	R-HSA-2428924	IGF1R signaling cascade	0.401125	0.37853	KLB	1
hsa-miR-34a-5p	R-HSA-373752	Netrin-1 signaling	0.401125	0.37853	SRC	1
hsa-miR-34a-5p	R-HSA-5654736	Signaling by FGFR1	0.401125	0.37853	SRC	1
hsa-miR-34a-5p	R-HSA-73894	DNA Repair	0.402024	0.37853	YY1/TP53/KDM4A/RAD51	4
hsa-miR-34a-5p	R-HSA-2404192	Signaling by Type 1 Insulin-like Growth Factor 1 Receptor...	0.40725	0.380712	KLB	1
hsa-miR-34a-5p	R-HSA-3214842	HDMs demethylate histones	0.40725	0.380712	KDM4A	1
hsa-miR-34a-5p	R-HSA-74751	Insulin receptor signalling cascade	0.40725	0.380712	KLB	1
hsa-miR-34a-5p	R-HSA-168643	Nucleotide-binding domain, leucine rich repeat containing...	0.413312	0.383639	BCL2	1
hsa-miR-34a-5p	R-HSA-349425	Autodegradation of the E3 ubiquitin ligase COP1	0.413312	0.383639	TP53	1
hsa-miR-34a-5p	R-HSA-75153	Apoptotic execution phase	0.413312	0.383639	HMGB1	1
hsa-miR-34a-5p	R-HSA-1660499	Synthesis of PIPs at the plasma membrane	0.419313	0.385563	PIK3CG	1
hsa-miR-34a-5p	R-HSA-69601	Ubiquitin Mediated Degradation of Phosphorylated Cdc25A	0.419313	0.385563	CDC25A	1
hsa-miR-34a-5p	R-HSA-69610	p53-Independent DNA Damage Response	0.419313	0.385563	CDC25A	1
hsa-miR-34a-5p	R-HSA-69613	p53-Independent G1/S DNA damage checkpoint	0.419313	0.385563	CDC25A	1
hsa-miR-34a-5p	R-HSA-1655829	Regulation of cholesterol biosynthesis by SREBP (SREBF)	0.431133	0.394395	PPARA	1
hsa-miR-34a-5p	R-HSA-4641257	Degradation of AXIN	0.431133	0.394395	AXIN2	1
hsa-miR-34a-5p	R-HSA-1474165	Reproduction	0.435957	0.394395	CDK4/RAD51	2
hsa-miR-34a-5p	R-HSA-3858494	Beta-catenin independent WNT signaling	0.435957	0.394395	WNT1/TCF7	2
hsa-miR-34a-5p	R-HSA-2151201	Transcriptional activation of mitochondrial biogenesis	0.436953	0.394395	PPARA	1
hsa-miR-34a-5p	R-HSA-3371497	HSP90 chaperone cycle for steroid hormone receptors (SHR)	0.436953	0.394395	AR	1
hsa-miR-34a-5p	R-HSA-432722	Golgi Associated Vesicle Biogenesis	0.436953	0.394395	VAMP2	1
hsa-miR-34a-5p	R-HSA-5578775	Ion homeostasis	0.436953	0.394395	FKBP1B	1
hsa-miR-34a-5p	R-HSA-5358351	Signaling by Hedgehog	0.449771	0.405033	GAS1/NUMB	2
hsa-miR-34a-5p	R-HSA-447115	Interleukin-12 family signaling	0.454063	0.407962	AIP	1
hsa-miR-34a-5p	R-HSA-5610780	Degradation of GLI1 by the proteasome	0.459651	0.41204	NUMB	1
hsa-miR-34a-5p	R-HSA-4086398	Ca2+ pathway	0.465182	0.416048	TCF7	1
hsa-miR-34a-5p	R-HSA-194315	Signaling by Rho GTPases	0.478041	0.426577	AR/BIRC5/SRC/CYBB/PPP1CC	5
hsa-miR-34a-5p	R-HSA-913709	O-linked glycosylation of mucins	0.481441	0.428637	GALNT7	1
hsa-miR-34a-5p	R-HSA-5625886	Activated PKN1 stimulates transcription of AR (androgen r...	0.49721	0.440678	AR	1
hsa-miR-34a-5p	R-HSA-5685942	HDR through Homologous Recombination (HRR)	0.49721	0.440678	RAD51	1
hsa-miR-34a-5p	R-HSA-3371453	Regulation of HSF1-mediated heat shock response	0.50236	0.443242	SIRT1	1
hsa-miR-34a-5p	R-HSA-427359	SIRT1 negatively regulates rRNA expression	0.50236	0.443242	SIRT1	1
hsa-miR-34a-5p	R-HSA-8948751	Regulation of PTEN stability and activity	0.507458	0.445736	AKT1	1
hsa-miR-34a-5p	R-HSA-909733	Interferon alpha/beta signaling	0.507458	0.445736	IFNB1	1
hsa-miR-34a-5p	R-HSA-1834949	Cytosolic sensors of pathogen-associated DNA	0.512505	0.446341	HMGB1	1
hsa-miR-34a-5p	R-HSA-4551638	SUMOylation of chromatin organization proteins	0.512505	0.446341	HDAC1	1
hsa-miR-34a-5p	R-HSA-1428517	The citric acid (TCA) cycle and respiratory electron tran...	0.512694	0.446341	LDHA/ATP5S	2
hsa-miR-34a-5p	R-HSA-69481	G2/M Checkpoints	0.512694	0.446341	CDC25A/TP53	2
hsa-miR-34a-5p	R-HSA-199992	trans-Golgi Network Vesicle Budding	0.522444	0.452821	VAMP2	1
hsa-miR-34a-5p	R-HSA-421837	Clathrin derived vesicle budding	0.522444	0.452821	VAMP2	1
hsa-miR-34a-5p	R-HSA-5654738	Signaling by FGFR2	0.527338	0.456056	SRC	1
hsa-miR-34a-5p	R-HSA-166520	Signalling by NGF	0.534676	0.460337	HDAC1/SRC	2
hsa-miR-34a-5p	R-HSA-1234174	Regulation of Hypoxia-inducible Factor (HIF) by oxygen	0.536977	0.460337	VEGFA	1
hsa-miR-34a-5p	R-HSA-2262749	Cellular response to hypoxia	0.536977	0.460337	VEGFA	1
hsa-miR-34a-5p	R-HSA-74752	Signaling by Insulin receptor	0.536977	0.460337	KLB	1
hsa-miR-34a-5p	R-HSA-8978868	Fatty acid metabolism	0.540833	0.461446	ACSL4/ACSL1	2
hsa-miR-34a-5p	R-HSA-3108214	SUMOylation of DNA damage response and repair proteins	0.541724	0.461446	CDKN2A	1
hsa-miR-34a-5p	R-HSA-6798695	Neutrophil degranulation	0.541797	0.461446	CD44/IMPDH2/CYBB/ATG7/HMGB1	5
hsa-miR-34a-5p	R-HSA-196854	Metabolism of vitamins and cofactors	0.546934	0.464813	NAMPT/RBP2	2
hsa-miR-34a-5p	R-HSA-187037	NGF signalling via TRKA from the plasma membrane	0.551072	0.466311	SRC	1
hsa-miR-34a-5p	R-HSA-8852276	The role of GTSE1 in G2/M progression after G2 checkpoint	0.551072	0.466311	TP53	1
hsa-miR-34a-5p	R-HSA-948021	Transport to the Golgi and subsequent modification	0.567844	0.47947	FUT8/ANK3	2
hsa-miR-34a-5p	R-HSA-1483255	PI Metabolism	0.578	0.485955	PIK3CG	1
hsa-miR-34a-5p	R-HSA-5696399	Global Genome Nucleotide Excision Repair (GG-NER)	0.578	0.485955	YY1	1
hsa-miR-34a-5p	R-HSA-2467813	Separation of Sister Chromatids	0.582356	0.488571	BIRC5/PPP1CC	2
hsa-miR-34a-5p	R-HSA-2029480	Fcgamma receptor (FCGR) dependent phagocytosis	0.586615	0.49005	SRC	1
hsa-miR-34a-5p	R-HSA-216083	Integrin cell surface interactions	0.586615	0.49005	CD44	1
hsa-miR-34a-5p	R-HSA-1474244	Extracellular matrix organization	0.593186	0.493071	CD44/BMP7/GDF5	3
hsa-miR-34a-5p	R-HSA-3371556	Cellular response to heat stress	0.595056	0.493071	SIRT1	1
hsa-miR-34a-5p	R-HSA-450531	Regulation of mRNA stability by proteins that bind AU-ric...	0.595056	0.493071	AKT1	1
hsa-miR-34a-5p	R-HSA-69275	G2/M Transition	0.59651	0.493071	CDC25A/TP53	2
hsa-miR-34a-5p	R-HSA-913531	Interferon Signaling	0.59651	0.493071	IFNB1/CD44	2
hsa-miR-34a-5p	R-HSA-428157	Sphingolipid metabolism	0.603327	0.496614	PRKD1	1
hsa-miR-34a-5p	R-HSA-8876198	RAB GEFs exchange GTP for GDP on RABs	0.603327	0.496614	AKT1	1
hsa-miR-34a-5p	R-HSA-68877	Mitotic Prometaphase	0.607577	0.499067	BIRC5/PPP1CC	2
hsa-miR-501-5p	R-HSA-4791275	Signaling by WNT in cancer	3.03962e-05	6.39921e-05	DKK1/GSK3B	2
hsa-miR-501-5p	R-HSA-201681	TCF dependent signaling in response to WNT	0.00144592	0.00044997	DKK1/GSK3B	2
hsa-miR-501-5p	R-HSA-1257604	PIP3 activates AKT signaling	0.00173005	0.00044997	LAMTOR5/GSK3B	2
hsa-miR-501-5p	R-HSA-9006925	Intracellular signaling by second messengers	0.0022031	0.00044997	LAMTOR5/GSK3B	2
hsa-miR-501-5p	R-HSA-195721	Signaling by WNT	0.00288595	0.00044997	DKK1/GSK3B	2
hsa-miR-501-5p	R-HSA-5663202	Diseases of signal transduction	0.00371719	0.00044997	DKK1/GSK3B	2
hsa-miR-501-5p	R-HSA-198323	AKT phosphorylates targets in the cytosol	0.00399012	0.00044997	GSK3B	1
hsa-miR-501-5p	R-HSA-4839735	AXIN mutants destabilize the destruction complex, activat...	0.00399012	0.00044997	GSK3B	1
hsa-miR-501-5p	R-HSA-4839744	truncated APC mutants destabilize the destruction complex	0.00399012	0.00044997	GSK3B	1
hsa-miR-501-5p	R-HSA-4839748	AMER1 mutants destabilize the destruction complex	0.00399012	0.00044997	GSK3B	1
hsa-miR-501-5p	R-HSA-5467337	APC truncation mutants have impaired AXIN binding	0.00399012	0.00044997	GSK3B	1
hsa-miR-501-5p	R-HSA-5467340	AXIN missense mutants destabilize the destruction complex	0.00399012	0.00044997	GSK3B	1
hsa-miR-501-5p	R-HSA-5467348	Truncations of AMER1 destabilize the destruction complex	0.00399012	0.00044997	GSK3B	1
hsa-miR-501-5p	R-HSA-3772470	Negative regulation of TCF-dependent signaling by WNT lig...	0.00427472	0.00044997	DKK1	1
hsa-miR-501-5p	R-HSA-4839743	phosphorylation site mutants of CTNNB1 are not targeted t...	0.00427472	0.00044997	GSK3B	1
hsa-miR-501-5p	R-HSA-5339716	Misspliced GSK3beta mutants stabilize beta-catenin	0.00427472	0.00044997	GSK3B	1
hsa-miR-501-5p	R-HSA-5358747	S33 mutants of beta-catenin aren't phosphorylated	0.00427472	0.00044997	GSK3B	1
hsa-miR-501-5p	R-HSA-5358749	S37 mutants of beta-catenin aren't phosphorylated	0.00427472	0.00044997	GSK3B	1
hsa-miR-501-5p	R-HSA-5358751	S45 mutants of beta-catenin aren't phosphorylated	0.00427472	0.00044997	GSK3B	1
hsa-miR-501-5p	R-HSA-5358752	T41 mutants of beta-catenin aren't phosphorylated	0.00427472	0.00044997	GSK3B	1
hsa-miR-501-5p	R-HSA-399956	CRMPs in Sema3A signaling	0.00455926	0.000457069	GSK3B	1
hsa-miR-501-5p	R-HSA-196299	Beta-catenin phosphorylation cascade	0.00484376	0.000463517	GSK3B	1
hsa-miR-501-5p	R-HSA-166208	mTORC1-mediated signalling	0.00683369	0.000624364	LAMTOR5	1
hsa-miR-501-5p	R-HSA-5674400	Constitutive Signaling by AKT1 E17K in Cancer	0.00711775	0.000624364	GSK3B	1
hsa-miR-501-5p	R-HSA-380972	Energy dependent regulation of mTOR by LKB1-AMPK	0.00825344	0.000695027	LAMTOR5	1
hsa-miR-501-5p	R-HSA-4641262	Disassembly of the destruction complex and recruitment of...	0.00882097	0.000714248	GSK3B	1
hsa-miR-501-5p	R-HSA-165159	mTOR signalling	0.0116553	0.000908798	LAMTOR5	1
hsa-miR-501-5p	R-HSA-5610783	Degradation of GLI2 by the proteasome	0.0170257	0.00121459	GSK3B	1
hsa-miR-501-5p	R-HSA-5610785	GLI3 is processed to GLI3R by the proteasome	0.0170257	0.00121459	GSK3B	1
hsa-miR-501-5p	R-HSA-8943724	Regulation of PTEN gene transcription	0.0173079	0.00121459	LAMTOR5	1
hsa-miR-501-5p	R-HSA-1632852	Macroautophagy	0.0192811	0.00123006	LAMTOR5	1
hsa-miR-501-5p	R-HSA-3371453	Regulation of HSF1-mediated heat shock response	0.0192811	0.00123006	GSK3B	1
hsa-miR-501-5p	R-HSA-373755	Semaphorin interactions	0.0192811	0.00123006	GSK3B	1
hsa-miR-501-5p	R-HSA-8939902	Regulation of RUNX2 expression and activity	0.020689	0.00128105	GSK3B	1
hsa-miR-501-5p	R-HSA-195253	Degradation of beta-catenin by the destruction complex	0.0232198	0.00138981	GSK3B	1
hsa-miR-501-5p	R-HSA-5628897	TP53 Regulates Metabolic Genes	0.0243431	0.00138981	LAMTOR5	1
hsa-miR-501-5p	R-HSA-3371556	Cellular response to heat stress	0.0249045	0.00138981	GSK3B	1
hsa-miR-501-5p	R-HSA-2219528	PI3K/AKT Signaling in Cancer	0.0257461	0.00138981	GSK3B	1
hsa-miR-501-5p	R-HSA-5250924	B-WICH complex positively regulates rRNA expression	0.0257461	0.00138981	GSK3B	1
hsa-miR-501-5p	R-HSA-5250913	Positive epigenetic regulation of rRNA expression	0.0299471	0.00157616	GSK3B	1
hsa-miR-501-5p	R-HSA-5610787	Hedgehog 'off' state	0.0319034	0.00163817	GSK3B	1
hsa-miR-501-5p	R-HSA-8878166	Transcriptional regulation by RUNX2	0.034136	0.00171108	GSK3B	1
hsa-miR-501-5p	R-HSA-6807070	PTEN Regulation	0.0394246	0.00193021	LAMTOR5	1
hsa-miR-501-5p	R-HSA-212165	Epigenetic regulation of gene expression	0.0413681	0.00196131	GSK3B	1
hsa-miR-501-5p	R-HSA-5358351	Signaling by Hedgehog	0.0419229	0.00196131	GSK3B	1
hsa-miR-501-5p	R-HSA-3700989	Transcriptional Regulation by TP53	0.101123	0.00462807	LAMTOR5	1
hsa-miR-501-5p	R-HSA-2262752	Cellular responses to stress	0.117503	0.00526329	GSK3B	1
hsa-miR-874-3p	R-HSA-6804758	Regulation of TP53 Activity through Acetylation	0.00011725	0.00260214	HDAC1/PIN1	2
hsa-miR-874-3p	R-HSA-2173796	SMAD2/SMAD3:SMAD4 heterotrimer regulates transcription	0.000133624	0.00260214	HDAC1/CDK9	2
hsa-miR-874-3p	R-HSA-2173793	Transcriptional activity of SMAD2/SMAD3:SMAD4 heterotrimer	0.000254079	0.00329857	HDAC1/CDK9	2
hsa-miR-874-3p	R-HSA-170834	Signaling by TGF-beta Receptor Complex	0.000700648	0.00607703	HDAC1/CDK9	2
hsa-miR-874-3p	R-HSA-3700989	Transcriptional Regulation by TP53	0.000780159	0.00607703	HDAC1/CDK9/PIN1	3
hsa-miR-874-3p	R-HSA-9006936	Signaling by TGF-beta family members	0.0013632	0.00884884	HDAC1/CDK9	2
hsa-miR-874-3p	R-HSA-157118	Signaling by NOTCH	0.00161197	0.00896888	HDAC1/E2F3	2
hsa-miR-874-3p	R-HSA-453279	Mitotic G1-G1/S phases	0.00280754	0.0136683	HDAC1/E2F3	2
hsa-miR-874-3p	R-HSA-5633007	Regulation of TP53 Activity	0.00327627	0.014178	HDAC1/PIN1	2
hsa-miR-874-3p	R-HSA-166520	Signalling by NGF	0.00395492	0.0154034	HDAC1/STAT3	2
hsa-miR-874-3p	R-HSA-2559583	Cellular Senescence	0.0048884	0.0169495	STAT3/E2F3	2
hsa-miR-874-3p	R-HSA-2586552	Signaling by Leptin	0.00626303	0.0169495	STAT3	1
hsa-miR-874-3p	R-HSA-68689	CDC6 association with the ORC:origin complex	0.00626303	0.0169495	E2F3	1
hsa-miR-874-3p	R-HSA-4641265	Repression of WNT target genes	0.00683077	0.0169495	HDAC1	1
hsa-miR-874-3p	R-HSA-8984722	Interleukin-35 Signalling	0.00683077	0.0169495	STAT3	1
hsa-miR-874-3p	R-HSA-2892247	POU5F1 (OCT4), SOX2, NANOG activate genes related to prol...	0.00739824	0.0169495	STAT3	1
hsa-miR-874-3p	R-HSA-432047	Passive transport by Aquaporins	0.00739824	0.0169495	AQP3	1
hsa-miR-874-3p	R-HSA-8983432	Interleukin-15 signaling	0.00796544	0.0172352	STAT3	1
hsa-miR-874-3p	R-HSA-69298	Association of licensing factors with the pre-replicative...	0.00853237	0.0174902	E2F3	1
hsa-miR-874-3p	R-HSA-1362300	Transcription of E2F targets under negative control by p1...	0.00909903	0.0177192	HDAC1	1
hsa-miR-874-3p	R-HSA-1839117	Signaling by cytosolic FGFR1 fusion mutants	0.0102315	0.0189758	STAT3	1
hsa-miR-874-3p	R-HSA-1362277	Transcription of E2F targets under negative control by DR...	0.0107974	0.019115	HDAC1	1
hsa-miR-874-3p	R-HSA-2173795	Downregulation of SMAD2/3:SMAD4 transcriptional activity	0.0130581	0.0191835	HDAC1	1
hsa-miR-874-3p	R-HSA-6783589	Interleukin-6 family signaling	0.0136226	0.0191835	STAT3	1
hsa-miR-874-3p	R-HSA-982772	Growth hormone receptor signaling	0.0136226	0.0191835	STAT3	1
hsa-miR-874-3p	R-HSA-1538133	G0 and Early G1	0.0153145	0.0191835	HDAC1	1
hsa-miR-874-3p	R-HSA-539107	Activation of E2F1 target genes at G1/S	0.0158779	0.0191835	HDAC1	1
hsa-miR-874-3p	R-HSA-69205	G1/S-Specific Transcription	0.0158779	0.0191835	HDAC1	1
hsa-miR-874-3p	R-HSA-186763	Downstream signal transduction	0.0164411	0.0191835	STAT3	1
hsa-miR-874-3p	R-HSA-1912408	Pre-NOTCH Transcription and Translation	0.0164411	0.0191835	E2F3	1
hsa-miR-874-3p	R-HSA-5663202	Diseases of signal transduction	0.0173052	0.0191835	HDAC1/STAT3	2
hsa-miR-874-3p	R-HSA-1839124	FGFR1 mutant receptor activation	0.0175666	0.0191835	STAT3	1
hsa-miR-874-3p	R-HSA-2559585	Oncogene Induced Senescence	0.0186911	0.0191835	E2F3	1
hsa-miR-874-3p	R-HSA-936440	Negative regulators of DDX58/IFIH1 signaling	0.0192529	0.0191835	PIN1	1
hsa-miR-874-3p	R-HSA-167238	Pausing and recovery of Tat-mediated HIV elongation	0.0203757	0.0191835	CDK9	1
hsa-miR-874-3p	R-HSA-167243	Tat-mediated HIV elongation arrest and recovery	0.0203757	0.0191835	CDK9	1
hsa-miR-874-3p	R-HSA-452723	Transcriptional regulation of pluripotent stem cells	0.0203757	0.0191835	STAT3	1
hsa-miR-874-3p	R-HSA-167287	HIV elongation arrest and recovery	0.0214975	0.0191835	CDK9	1
hsa-miR-874-3p	R-HSA-167290	Pausing and recovery of HIV elongation	0.0214975	0.0191835	CDK9	1
hsa-miR-874-3p	R-HSA-5655302	Signaling by FGFR1 in disease	0.0214975	0.0191835	STAT3	1
hsa-miR-874-3p	R-HSA-390471	Association of TriC/CCT with target proteins during biosy...	0.0220579	0.0191835	STAT3	1
hsa-miR-874-3p	R-HSA-2262752	Cellular responses to stress	0.0223425	0.0191835	STAT3/E2F3	2
hsa-miR-874-3p	R-HSA-451927	Interleukin-2 family signaling	0.0226182	0.0191835	STAT3	1
hsa-miR-874-3p	R-HSA-3769402	Deactivation of the beta-catenin transactivating complex	0.0237378	0.0191835	HDAC1	1
hsa-miR-874-3p	R-HSA-1433557	Signaling by SCF-KIT	0.0242972	0.0191835	STAT3	1
hsa-miR-874-3p	R-HSA-432040	Vasopressin regulates renal water homeostasis via Aquaporins	0.0242972	0.0191835	AQP3	1
hsa-miR-874-3p	R-HSA-69231	Cyclin D associated events in G1	0.0248563	0.0191835	E2F3	1
hsa-miR-874-3p	R-HSA-69236	G1 Phase	0.0248563	0.0191835	E2F3	1
hsa-miR-874-3p	R-HSA-1912422	Pre-NOTCH Expression and Processing	0.0254152	0.0191835	E2F3	1
hsa-miR-874-3p	R-HSA-1266695	Interleukin-7 signaling	0.0259738	0.0191835	STAT3	1
hsa-miR-874-3p	R-HSA-2122947	NOTCH1 Intracellular Domain Regulates Transcription	0.0265322	0.0191835	HDAC1	1
hsa-miR-874-3p	R-HSA-73762	RNA Polymerase I Transcription Initiation	0.0265322	0.0191835	HDAC1	1
hsa-miR-874-3p	R-HSA-167169	HIV Transcription Elongation	0.0270902	0.0191835	CDK9	1
hsa-miR-874-3p	R-HSA-167200	Formation of HIV-1 elongation complex containing HIV-1 Tat	0.0270902	0.0191835	CDK9	1
hsa-miR-874-3p	R-HSA-167246	Tat-mediated elongation of the HIV-1 transcript	0.0270902	0.0191835	CDK9	1
hsa-miR-874-3p	R-HSA-6783783	Interleukin-10 signaling	0.027648	0.0192289	STAT3	1
hsa-miR-874-3p	R-HSA-167152	Formation of HIV elongation complex in the absence of HIV...	0.0282056	0.0192709	CDK9	1
hsa-miR-874-3p	R-HSA-445717	Aquaporin-mediated transport	0.0293199	0.0192709	AQP3	1
hsa-miR-874-3p	R-HSA-8848021	Signaling by PTK6	0.0304331	0.0192709	STAT3	1
hsa-miR-874-3p	R-HSA-9006927	Signaling by Non-Receptor Tyrosine Kinases	0.0304331	0.0192709	STAT3	1
hsa-miR-874-3p	R-HSA-186797	Signaling by PDGF	0.0326563	0.0192709	STAT3	1
hsa-miR-874-3p	R-HSA-2644602	Signaling by NOTCH1 PEST Domain Mutants in Cancer	0.0326563	0.0192709	HDAC1	1
hsa-miR-874-3p	R-HSA-2644603	Signaling by NOTCH1 in Cancer	0.0326563	0.0192709	HDAC1	1
hsa-miR-874-3p	R-HSA-2644606	Constitutive Signaling by NOTCH1 PEST Domain Mutants	0.0326563	0.0192709	HDAC1	1
hsa-miR-874-3p	R-HSA-2894858	Signaling by NOTCH1 HD+PEST Domain Mutants in Cancer	0.0326563	0.0192709	HDAC1	1
hsa-miR-874-3p	R-HSA-2894862	Constitutive Signaling by NOTCH1 HD+PEST Domain Mutants	0.0326563	0.0192709	HDAC1	1
hsa-miR-874-3p	R-HSA-447115	Interleukin-12 family signaling	0.0332115	0.019306	STAT3	1
hsa-miR-874-3p	R-HSA-8943724	Regulation of PTEN gene transcription	0.034321	0.019435	HDAC1	1
hsa-miR-874-3p	R-HSA-112382	Formation of RNA Pol II elongation complex	0.0354294	0.019435	CDK9	1
hsa-miR-874-3p	R-HSA-1226099	Signaling by FGFR in disease	0.0354294	0.019435	STAT3	1
hsa-miR-874-3p	R-HSA-75955	RNA Polymerase II Transcription Elongation	0.0354294	0.019435	CDK9	1
hsa-miR-874-3p	R-HSA-6796648	TP53 Regulates Transcription of DNA Repair Genes	0.0381959	0.0203785	CDK9	1
hsa-miR-874-3p	R-HSA-68867	Assembly of the pre-replicative complex	0.0381959	0.0203785	E2F3	1
hsa-miR-874-3p	R-HSA-4551638	SUMOylation of chromatin organization proteins	0.0393006	0.0204231	HDAC1	1
hsa-miR-874-3p	R-HSA-1169408	ISG15 antiviral mechanism	0.0398526	0.0204231	PIN1	1
hsa-miR-874-3p	R-HSA-1169410	Antiviral mechanism by IFN-stimulated genes	0.0398526	0.0204231	PIN1	1
hsa-miR-874-3p	R-HSA-1980143	Signaling by NOTCH1	0.0409557	0.0204631	HDAC1	1
hsa-miR-874-3p	R-HSA-167172	Transcription of the HIV genome	0.0415069	0.0204631	CDK9	1
hsa-miR-874-3p	R-HSA-6807505	RNA polymerase II transcribes snRNA genes	0.0415069	0.0204631	CDK9	1
hsa-miR-874-3p	R-HSA-427389	ERCC6 (CSB) and EHMT2 (G9a) positively regulate rRNA expr...	0.0426084	0.0204875	HDAC1	1
hsa-miR-874-3p	R-HSA-69304	Regulation of DNA replication	0.0426084	0.0204875	E2F3	1
hsa-miR-874-3p	R-HSA-187037	NGF signalling via TRKA from the plasma membrane	0.0437089	0.0207603	STAT3	1
hsa-miR-874-3p	R-HSA-6806834	Signaling by MET	0.0442588	0.0207682	STAT3	1
hsa-miR-874-3p	R-HSA-195253	Degradation of beta-catenin by the destruction complex	0.0459068	0.0210459	HDAC1	1
hsa-miR-874-3p	R-HSA-168928	DDX58/IFIH1-mediated induction of interferon-alpha/beta	0.0464556	0.0210459	PIN1	1
hsa-miR-874-3p	R-HSA-674695	RNA Polymerase II Pre-transcription Events	0.0475524	0.0210459	CDK9	1
hsa-miR-874-3p	R-HSA-68874	M/G1 Transition	0.0475524	0.0210459	E2F3	1
hsa-miR-874-3p	R-HSA-69002	DNA Replication Pre-Initiation	0.0475524	0.0210459	E2F3	1
hsa-miR-874-3p	R-HSA-201722	Formation of the beta-catenin:TCF transactivating complex	0.0508365	0.0219994	HDAC1	1
hsa-miR-874-3p	R-HSA-6804756	Regulation of TP53 Activity through Phosphorylation	0.0508365	0.0219994	PIN1	1
hsa-miR-874-3p	R-HSA-3214815	HDACs deacetylate histones	0.0524751	0.0224201	HDAC1	1
hsa-miR-874-3p	R-HSA-390466	Chaperonin-mediated protein folding	0.0535661	0.0224201	STAT3	1
hsa-miR-874-3p	R-HSA-193704	p75 NTR receptor-mediated signalling	0.0541112	0.0224201	HDAC1	1
hsa-miR-874-3p	R-HSA-8936459	RUNX1 regulates genes involved in megakaryocyte different...	0.0541112	0.0224201	HDAC1	1
hsa-miR-874-3p	R-HSA-391251	Protein folding	0.056833	0.0232999	STAT3	1
hsa-miR-874-3p	R-HSA-427413	NoRC negatively regulates rRNA expression	0.0590056	0.0233585	HDAC1	1
hsa-miR-874-3p	R-HSA-5250913	Positive epigenetic regulation of rRNA expression	0.0590056	0.0233585	HDAC1	1
hsa-miR-874-3p	R-HSA-6785807	Interleukin-4 and 13 signaling	0.0600904	0.0233585	STAT3	1
hsa-miR-874-3p	R-HSA-69306	DNA Replication	0.0600904	0.0233585	E2F3	1
hsa-miR-874-3p	R-HSA-5250941	Negative epigenetic regulation of rRNA expression	0.0606324	0.0233585	HDAC1	1
hsa-miR-874-3p	R-HSA-73854	RNA Polymerase I Promoter Clearance	0.0606324	0.0233585	HDAC1	1
hsa-miR-874-3p	R-HSA-2559582	Senescence-Associated Secretory Phenotype (SASP)	0.0611741	0.0233585	STAT3	1
hsa-miR-874-3p	R-HSA-73864	RNA Polymerase I Transcription	0.0622568	0.0235412	HDAC1	1
hsa-miR-874-3p	R-HSA-2559580	Oxidative Stress Induced Senescence	0.069269	0.0256937	E2F3	1
hsa-miR-874-3p	R-HSA-3108232	SUMO E3 ligases SUMOylate target proteins	0.069269	0.0256937	HDAC1	1
hsa-miR-874-3p	R-HSA-162909	Host Interactions of HIV factors	0.0708809	0.0259956	CDK9	1
hsa-miR-874-3p	R-HSA-69206	G1/S Transition	0.0714177	0.0259956	HDAC1	1
hsa-miR-874-3p	R-HSA-2990846	SUMOylation	0.0724906	0.0261418	HDAC1	1
hsa-miR-874-3p	R-HSA-162599	Late Phase of HIV Life Cycle	0.0767716	0.0273713	CDK9	1
hsa-miR-874-3p	R-HSA-6807070	PTEN Regulation	0.0773055	0.0273713	HDAC1	1
hsa-miR-874-3p	R-HSA-212165	Epigenetic regulation of gene expression	0.0810361	0.0284337	HDAC1	1
hsa-miR-874-3p	R-HSA-162587	HIV Life Cycle	0.0836931	0.0291038	CDK9	1
hsa-miR-874-3p	R-HSA-983231	Factors involved in megakaryocyte development and platele...	0.0947826	0.0326684	HDAC1	1
hsa-miR-874-3p	R-HSA-913531	Interferon Signaling	0.1068	0.0364875	PIN1	1
hsa-miR-874-3p	R-HSA-453274	Mitotic G2-G2/M phases	0.107838	0.0365219	E2F3	1
hsa-miR-874-3p	R-HSA-162906	HIV Infection	0.125853	0.0418943	CDK9	1
hsa-miR-874-3p	R-HSA-201681	TCF dependent signaling in response to WNT	0.125853	0.0418943	HDAC1	1
hsa-miR-874-3p	R-HSA-8878171	Transcriptional regulation by RUNX1	0.12891	0.0425484	HDAC1	1
hsa-miR-874-3p	R-HSA-1257604	PIP3 activates AKT signaling	0.13702	0.0448451	HDAC1	1
hsa-miR-874-3p	R-HSA-8854691	Interleukin-20 family signaling	0.140045	0.0454531	STAT3	1
hsa-miR-874-3p	R-HSA-3247509	Chromatin modifying enzymes	0.147069	0.0469503	HDAC1	1
hsa-miR-874-3p	R-HSA-4839726	Chromatin organization	0.147069	0.0469503	HDAC1	1
hsa-miR-874-3p	R-HSA-9006925	Intracellular signaling by second messengers	0.153548	0.0486202	HDAC1	1
hsa-miR-874-3p	R-HSA-195721	Signaling by WNT	0.174201	0.0547151	HDAC1	1
hsa-miR-874-3p	R-HSA-5663205	Infectious disease	0.200136	0.0623583	CDK9	1

## Sheet: WIKI PATHWAYS
Supplementary Table S4:			Functional enrichment of KEGG pathways, Reactome pathways, and wiki pathways, data corresponding to (Fig.3C).
microRNA	WIKIPATHWAY ID	Description	p-value	FDR	Genes	Count
hsa-miR-103a-3p	WP707	DNA Damage Response	4.52325e-06	0.000428518	CCNE1/CDK2/CREB1/RAD51/CDK6	5
hsa-miR-103a-3p	WP2516	ATM Signaling Pathway	1.26204e-05	0.000466714	CCNE1/CDK2/CREB1/RAD51	4
hsa-miR-103a-3p	WP138	Androgen receptor signaling pathway	1.77208e-05	0.000466714	CCNE1/CREB1/CAV1/PTEN/RUNX2	5
hsa-miR-103a-3p	WP1530	miRNA Regulation of DNA Damage Response	1.97057e-05	0.000466714	CCNE1/CDK2/CREB1/RAD51/CDK6	5
hsa-miR-103a-3p	WP53	ID signaling pathway	2.50084e-05	0.000473843	CCNE1/CDK2/ID2	3
hsa-miR-103a-3p	WP2023	Cell Differentiation - Index expanded	3.1017e-05	0.000489742	KLF4/ID2/MEF2D/RUNX2	4
hsa-miR-103a-3p	WP45	G1 to S cell cycle control	8.26257e-05	0.00111824	CCNE1/CDK2/CREB1/CDK6	4
hsa-miR-103a-3p	WP2261	Signaling Pathways in Glioblastoma	0.000227864	0.00253639	CCNE1/CDK2/PTEN/CDK6	4
hsa-miR-103a-3p	WP4262	Breast cancer pathway	0.000240957	0.00253639	PTEN/RAD51/CDK6/SFRP4/DVL1	5
hsa-miR-103a-3p	WP1545	miRNAs involved in DNA damage response	0.000805121	0.00762746	CCNE1/CREB1/CDK6	3
hsa-miR-103a-3p	WP1991	SRF and miRs in Smooth Muscle Differentiation and Proliferation	0.00102168	0.00806588	KLF4/MEF2D	2
hsa-miR-103a-3p	WP3892	Development of pulmonary dendritic cells and macrophage subsets	0.00102168	0.00806588	ID2/RUNX2	2
hsa-miR-103a-3p	WP236	Adipogenesis	0.00128821	0.00926269	CREB1/MEF2D/SFRP4/DVL1	4
hsa-miR-103a-3p	WP4172	PI3K-Akt Signaling Pathway	0.00136882	0.00926269	CCNE1/CDK2/CREB1/PTEN/CDK6/MYB	6
hsa-miR-103a-3p	WP2374	Oncostatin M Signaling Pathway	0.00180731	0.0107012	CDK2/CREB1/TIMP3	3
hsa-miR-103a-3p	WP3651	Pathways Affected in Adenoid Cystic Carcinoma	0.00180731	0.0107012	PTEN/MYB/MYCN	3
hsa-miR-103a-3p	WP2032	Human Thyroid Stimulating Hormone (TSH) signaling pathway	0.00196966	0.0109764	CCNE1/CDK2/CREB1	3
hsa-miR-103a-3p	WP1984	Integrated Breast Cancer Pathway	0.00233865	0.0123087	CDK2/CREB1/PTEN/RAD51	4
hsa-miR-103a-3p	WP437	EGF/EGFR Signaling Pathway	0.00294046	0.0146616	CREB1/CAV1/PTEN/MEF2D	4
hsa-miR-103a-3p	WP2446	Retinoblastoma Gene in Cancer	0.0041064	0.0194514	CCNE1/CDK2/CDK6	3
hsa-miR-103a-3p	WP2877	Vitamin D Receptor Pathway	0.00462419	0.020861	CCNE1/CDK2/KLF4/TIMP3	4
hsa-miR-103a-3p	WP4258	LncRNA involvement in canonical Wnt signaling and colorectal cancer	0.00655248	0.0272154	CDK6/SFRP4/DVL1	3
hsa-miR-103a-3p	WP4149	White fat cell differentiation	0.0066073	0.0272154	CREB1/KLF4	2
hsa-miR-103a-3p	WP400	p38 MAPK Signaling Pathway	0.00700428	0.0276485	CREB1/MEF2D	2
hsa-miR-103a-3p	WP3971	Role of Osx and miRNAs in tooth development	0.00783001	0.0296716	KLF4/RUNX2	2
hsa-miR-103a-3p	WP2012	miRs in Muscle Cell Differentiation	0.00869759	0.0316916	ID2/MEF2D	2
hsa-miR-103a-3p	WP179	Cell Cycle	0.0101654	0.0356682	CCNE1/CDK2/CDK6	3
hsa-miR-103a-3p	WP2332	Interleukin-11 Signaling Pathway	0.0115453	0.039063	CREB1/RUNX2	2
hsa-miR-103a-3p	WP1971	Integrated Cancer Pathway	0.0125742	0.0410771	CDK2/PTEN	2
hsa-miR-103a-3p	WP1541	Energy Metabolism	0.0136419	0.0430795	CREB1/MEF2D	2
hsa-miR-103a-3p	WP2038	Regulation of Microtubule Cytoskeleton	0.0141901	0.0433653	PTEN/DVL1	2
hsa-miR-103a-3p	WP363	Wnt Signaling Pathway	0.0164771	0.0487809	CDK6/DVL1	2
hsa-miR-103a-3p	WP3286	Copper homeostasis	0.017072	0.0490106	PTEN/ADAM10	2
hsa-miR-103a-3p	WP474	Endochondral Ossification	0.0242033	0.0674395	TIMP3/RUNX2	2
hsa-miR-103a-3p	WP2034	Leptin signaling pathway	0.0323478	0.0875578	CREB1/PTEN	2
hsa-miR-103a-3p	WP4016	DNA IR-damage and cellular response via ATR	0.0380183	0.100048	CDK2/RAD51	2
hsa-miR-103a-3p	WP4298	Viral Acute Myocarditis	0.0397044	0.10164	CREB1/CAV1	2
hsa-miR-103a-3p	WP3594	Circadian rythm related genes	0.0407688	0.10164	CREB1/PTEN/ID2	3
hsa-miR-103a-3p	WP4336	ncRNAs involved in Wnt signaling in hepatocellular carcinoma	0.0422866	0.101776	SFRP4/DVL1	2
hsa-miR-103a-3p	WP4263	Pancreatic adenocarcinoma pathway	0.0431612	0.101776	RAD51/CDK6	2
hsa-miR-103a-3p	WP1425	Bone Morphogenic Protein (BMP) Signalling and Regulation	0.0440463	0.101776	RUNX2	1
hsa-miR-103a-3p	WP186	Homologous recombination	0.0476317	0.104941	RAD51	1
hsa-miR-103a-3p	WP3301	MFAP5-mediated ovarian cancer cell motility and invasiveness	0.0476317	0.104941	CREB1	1
hsa-miR-103a-3p	WP3853	ERK Pathway in Huntington's Disease	0.0512042	0.108073	CREB1	1
hsa-miR-103a-3p	WP23	B Cell Receptor Signaling Pathway	0.0513348	0.108073	CREB1/MEF2D	2
hsa-miR-103a-3p	WP1604	Codeine and Morphine Metabolism	0.0547639	0.108819	CYP2C8	1
hsa-miR-103a-3p	WP3299	let-7 inhibition of ES cell reprogramming	0.0547639	0.108819	KLF4	1
hsa-miR-103a-3p	WP2064	Neural Crest Differentiation	0.0551349	0.108819	MYB/DVL1	2
hsa-miR-103a-3p	WP3888	VEGFA-VEGFR2 Signaling Pathway	0.057579	0.110483	CREB1/CAV1/CYP2C8	3
hsa-miR-103a-3p	WP501	GPCRs, Class C Metabotropic glutamate, pheromone	0.0583107	0.110483	GPRC5A	1
hsa-miR-103a-3p	WP3664	Regulation of Wnt/B-catenin Signaling by Small Molecule Compounds	0.0653662	0.11821	SFRP4	1
hsa-miR-103a-3p	WP3859	TGF-B Signaling in Thyroid Cells for Epithelial-Mesenchymal Transition	0.0653662	0.11821	RUNX2	1
hsa-miR-103a-3p	WP710	DNA Damage Response (only ATM dependent)	0.0681436	0.11821	PTEN/DVL1	2
hsa-miR-103a-3p	WP734	Serotonin Receptor 4/6/7 and NR3C Signaling	0.0688749	0.11821	CREB1	1
hsa-miR-103a-3p	WP428	Wnt Signaling Pathway	0.0712801	0.11821	SFRP4/DVL1	2
hsa-miR-103a-3p	WP3931	ESC Pluripotency Pathways	0.0723362	0.11821	PTEN/DVL1	2
hsa-miR-103a-3p	WP391	Mitochondrial Gene Expression	0.072371	0.11821	CREB1	1
hsa-miR-103a-3p	WP516	Hypertrophy Model	0.072371	0.11821	ADAM10	1
hsa-miR-103a-3p	WP2533	Glycerophospholipid Biosynthetic Pathway	0.0758545	0.11977	GPD1	1
hsa-miR-103a-3p	WP691	Tamoxifen metabolism	0.0758545	0.11977	CYP2C8	1
hsa-miR-103a-3p	WP3599	Transcription factor regulation in adipogenesis	0.0793255	0.12121	CREB1	1
hsa-miR-103a-3p	WP3657	Hematopoietic Stem Cell Gene Regulation by GABP alpha/beta Complex	0.0793255	0.12121	PTEN	1
hsa-miR-103a-3p	WP712	Estrogen signaling pathway	0.0827839	0.124487	CREB1	1
hsa-miR-103a-3p	WP1539	Angiogenesis	0.08623	0.127643	TIMP3	1
hsa-miR-103a-3p	WP366	TGF-beta Signaling Pathway	0.0876482	0.127746	CAV1/RUNX2	2
hsa-miR-103a-3p	WP3668	Hypothesized Pathways in Pathogenesis of Cardiovascular Disease	0.0896636	0.128704	RUNX2	1
hsa-miR-103a-3p	WP325	Triacylglyceride Synthesis	0.0930848	0.13162	GPD1	1
hsa-miR-103a-3p	WP2035	Follicle Stimulating Hormone (FSH) signaling pathway	0.0964937	0.132486	CREB1	1
hsa-miR-103a-3p	WP3845	Canonical and Non-canonical Notch signaling	0.0964937	0.132486	ADAM10	1
hsa-miR-103a-3p	WP2249	Metastatic brain tumor	0.0998904	0.133286	CDK6	1
hsa-miR-103a-3p	WP4300	Extracellular vesicles in the crosstalk of cardiac cells	0.0998904	0.133286	PTEN	1
hsa-miR-103a-3p	WP2583	T-Cell Receptor and Co-stimulatory Signaling	0.103275	0.1357	PTEN	1
hsa-miR-103a-3p	WP129	Matrix Metalloproteinases	0.106647	0.1357	TIMP3	1
hsa-miR-103a-3p	WP3844	PI3K-AKT-mTOR signaling pathway and therapeutic opportunities	0.106647	0.1357	PTEN	1
hsa-miR-103a-3p	WP2059	Alzheimers Disease	0.107429	0.1357	ADAM10/CACNA1C	2
hsa-miR-103a-3p	WP3850	Factors and pathways affecting insulin-like growth factor (IGF1)-Akt signaling	0.110007	0.137128	PTEN	1
hsa-miR-103a-3p	WP3893	Development and heterogeneity of the ILC family	0.113355	0.139466	ID2	1
hsa-miR-103a-3p	WP4204	Tumor suppressor activity of SMARCB1	0.116691	0.140368	CDK6	1
hsa-miR-103a-3p	WP313	Signaling of Hepatocyte Growth Factor Receptor	0.120015	0.140368	PTEN	1
hsa-miR-103a-3p	WP3676	BDNF-TrkB Signaling	0.120015	0.140368	CREB1	1
hsa-miR-103a-3p	WP3982	miRNA regulation of p53 pathway in prostate cancer	0.120015	0.140368	PTEN	1
hsa-miR-103a-3p	WP4239	Epithelial to mesenchymal transition in colorectal cancer	0.124554	0.142166	ID2/MEF2D	2
hsa-miR-103a-3p	WP706	Sudden Infant Death Syndrome (SIDS) Susceptibility Pathways	0.124554	0.142166	CREB1/MYB	2
hsa-miR-103a-3p	WP3614	Photodynamic therapy-induced HIF-1 survival signaling	0.129914	0.144796	BNIP3	1
hsa-miR-103a-3p	WP3995	Prion disease pathway	0.129914	0.144796	CREB1	1
hsa-miR-103a-3p	WP2029	Cell Differentiation - Index	0.133191	0.146722	MEF2D	1
hsa-miR-103a-3p	WP4150	Wnt Signaling in Kidney Disease	0.136455	0.14859	DVL1	1
hsa-miR-103a-3p	WP2828	Bladder Cancer	0.142948	0.153871	DAPK1	1
hsa-miR-103a-3p	WP2636	Common Pathways Underlying Drug Addiction	0.146177	0.153871	CREB1	1
hsa-miR-103a-3p	WP466	DNA Replication	0.146177	0.153871	CDK2	1
hsa-miR-103a-3p	WP268	Notch Signaling Pathway	0.162149	0.168395	DVL1	1
hsa-miR-103a-3p	WP2586	Aryl Hydrocarbon Receptor	0.165308	0.168395	CDK2	1
hsa-miR-103a-3p	WP4008	NO/cGMP/PKG mediated Neuroprotection	0.165308	0.168395	CREB1	1
hsa-miR-103a-3p	WP306	Focal Adhesion	0.173935	0.174235	CAV1/PTEN	2
hsa-miR-103a-3p	WP3611	Photodynamic therapy-induced AP-1 survival signaling.	0.174719	0.174235	CCNE1	1
hsa-miR-103a-3p	WP3959	DNA IR-Double Strand Breaks (DSBs) and cellular response via ATM	0.187109	0.180878	RAD51	1
hsa-miR-103a-3p	WP4222	Phosphodiesterases in neuronal function	0.187109	0.180878	CREB1	1
hsa-miR-103a-3p	WP585	Interferon type I signaling pathways	0.187109	0.180878	CREB1	1
hsa-miR-103a-3p	WP560	TGF-beta Receptor Signaling	0.196284	0.187831	RUNX2	1
hsa-miR-103a-3p	WP3527	Preimplantation Embryo	0.202345	0.190697	KLF4	1
hsa-miR-103a-3p	WP3584	MECP2 and Associated Rett Syndrome	0.208363	0.190697	CREB1	1
hsa-miR-103a-3p	WP2849	Hematopoietic Stem Cell Differentiation	0.211355	0.190697	MYB	1
hsa-miR-103a-3p	WP4155	Endometrial cancer	0.211355	0.190697	PTEN	1
hsa-miR-103a-3p	WP4286	Genotoxicity pathway	0.211355	0.190697	ID2	1
hsa-miR-103a-3p	WP43	Oxidation by Cytochrome P450	0.211355	0.190697	CYP2C8	1
hsa-miR-103a-3p	WP3998	Prader-Willi and Angelman Syndrome	0.220268	0.195023	CDK6	1
hsa-miR-103a-3p	WP4255	Non-small cell lung cancer	0.220268	0.195023	CDK6	1
hsa-miR-103a-3p	WP3680	Association Between Physico-Chemical Features and Toxicity Associated Pathways	0.226156	0.198382	DVL1	1
hsa-miR-103a-3p	WP3303	RAC1/PAK1/p38/MMP2 Pathway	0.229084	0.199107	RAD51	1
hsa-miR-103a-3p	WP2359	Parkin-Ubiquitin Proteasomal System pathway	0.232001	0.19981	CCNE1	1
hsa-miR-139-3p	WP129	Matrix Metalloproteinases	0.00933774	0.0071754	MMP11	1
hsa-miR-139-3p	WP3527	Preimplantation Embryo	0.0186317	0.0071754	ELAVL1	1
hsa-miR-139-3p	WP1403	AMP-activated Protein Kinase (AMPK) Signaling	0.0214113	0.0071754	ELAVL1	1
hsa-miR-139-3p	WP4336	ncRNAs involved in Wnt signaling in hepatocellular carcinoma	0.0272665	0.0071754	ELAVL1	1
hsa-miR-139-3p	WP2853	Endoderm Differentiation	0.0450316	0.00948033	ELAVL1	1
hsa-miR-139-3p	WP3932	Focal Adhesion-PI3K-Akt-mTOR-signaling pathway	0.0940809	0.0165054	ELAVL1	1
hsa-miR-34a-5p	WP4262	Breast cancer pathway	1.46329e-13	1.84837e-11	MYC/CDK4/CDK6/CCND1/WNT1/AXIN2/E2F3/DLL1/NOTCH1/MAP2K1/E2F1/NOTCH2/TP53/KIT/TCF7/BAX/ERBB2/AKT1/FOS/RAD51	20
hsa-miR-34a-5p	WP2261	Signaling Pathways in Glioblastoma	1.17744e-12	7.43646e-11	MET/CDK4/CDK6/CCND1/MDM4/MAP2K1/E2F1/PDGFRA/TP53/CDKN2A/PDGFRB/SRC/ERBB2/PIK3CG/AKT1	15
hsa-miR-34a-5p	WP4263	Pancreatic adenocarcinoma pathway	5.06142e-11	2.13112e-09	CDK4/CDK6/CCND1/E2F3/MAP2K1/VEGFA/E2F1/TP53/CDKN2A/SMAD4/BAX/ERBB2/AKT1/RAD51	14
hsa-miR-34a-5p	WP1984	Integrated Breast Cancer Pathway	1.23823e-10	3.91022e-09	MYC/CDK4/CDC25A/CCND1/SIRT1/BCL2/VEGFA/E2F1/IMPA1/FOSL1/TP53/HDAC1/AR/SMAD4/BAX/AKT1/RAD51	17
hsa-miR-34a-5p	WP710	DNA Damage Response (only ATM dependent)	1.55552e-10	3.92974e-09	MYC/CCND3/CCND1/WNT1/BCL2/FOSL1/TP53/CDKN2A/SMAD4/TCF7/BAX/ERBB2/PIK3CG/AKT1/HMGB1	15
hsa-miR-34a-5p	WP2828	Bladder Cancer	3.66774e-10	7.72157e-09	MYC/CDK4/CCND1/MAP2K1/VEGFA/E2F1/TP53/CDKN2A/SRC/ERBB2	10
hsa-miR-34a-5p	WP2446	Retinoblastoma Gene in Cancer	5.88931e-10	1.06273e-08	MYC/CDK4/CCNE2/CCND3/CDC25A/CDK6/CCND1/E2F3/E2F1/TP53/HDAC1/STMN1/HMGB1	13
hsa-miR-34a-5p	WP615	Senescence and Autophagy in Cancer	7.2977e-10	1.15227e-08	BCL2/MAP2K1/IFNB1/E2F1/CD44/CEBPB/TP53/CDKN2A/SRC/SMAD4/IL6R/ATG5/ATG7/BECN1	14
hsa-miR-34a-5p	WP4216	Chromosomal and microsatellite instability in colorectal cancer	9.29195e-10	1.30413e-08	MYC/CCND1/AXIN2/BCL2/MAP2K1/TP53/BIRC5/SMAD4/TCF7/BAX/AKT1/FOS	12
hsa-miR-34a-5p	WP45	G1 to S cell cycle control	2.55991e-09	3.23358e-08	MYC/CDK4/CCNE2/CCND3/CDC25A/CDK6/CCND1/E2F3/E2F1/TP53/CDKN2A	11
hsa-miR-34a-5p	WP4255	Non-small cell lung cancer	3.60478e-09	4.13946e-08	CDK4/CDK6/CCND1/E2F3/MAP2K1/E2F1/TP53/CDKN2A/BAX/ERBB2/AKT1	11
hsa-miR-34a-5p	WP707	DNA Damage Response	5.89181e-09	6.20191e-08	MYC/CDK4/CCNE2/CCND3/CDC25A/CDK6/CCND1/E2F1/TP53/BAX/RAD51	11
hsa-miR-34a-5p	WP399	Wnt Signaling Pathway and Pluripotency	6.98818e-09	6.79013e-08	MYC/CCND3/CCND1/WNT1/AXIN2/CD44/NANOG/SOX2/FOSL1/TP53/POU5F1/TCF7/PRKD1	13
hsa-miR-34a-5p	WP4155	Endometrial cancer	3.15941e-08	2.66056e-07	MYC/CCND1/AXIN2/MAP2K1/TP53/TCF7/BAX/ERBB2/AKT1/FOS	10
hsa-miR-34a-5p	WP61	Notch Signaling Pathway	3.15941e-08	2.66056e-07	JAG1/MYC/CCND1/DLL1/NOTCH1/NOTCH2/HDAC1/SRC/NUMB/AKT1	10
hsa-miR-34a-5p	WP179	Cell Cycle	3.50456e-08	2.76676e-07	MYC/CDK4/CCNE2/CCND3/CDC25A/CDK6/CCND1/E2F3/E2F1/TP53/CDKN2A/HDAC1/SMAD4	13
hsa-miR-34a-5p	WP3646	Hepatitis C and Hepatocellular Carcinoma	5.13211e-08	3.81333e-07	MYC/CCND1/VEGFA/CD44/TP53/BIRC5/SMAD4/IL6R/AKT1	9
hsa-miR-34a-5p	WP3678	Amplification and Expansion of Oncogenic Pathways as Metastatic Traits	1.25605e-07	8.8144e-07	JAG1/NOTCH1/VEGFA/SRC/TCF7/PIK3CG	6
hsa-miR-34a-5p	WP1530	miRNA Regulation of DNA Damage Response	1.45104e-07	9.64682e-07	MYC/CDK4/CCNE2/CCND3/CDC25A/CDK6/CCND1/E2F1/TP53/BAX/RAD51	11
hsa-miR-34a-5p	WP4172	PI3K-Akt Signaling Pathway	2.06427e-07	1.30375e-06	MYC/MYB/MET/CDK4/CCNE2/CCND3/CDK6/CCND1/BCL2/MAP2K1/VEGFA/IFNB1/PDGFRA/TP53/PDGFRB/CSF1R/KIT/IL6R/PIK3CG/AKT1	20
hsa-miR-34a-5p	WP1971	Integrated Cancer Pathway	3.91138e-07	2.35271e-06	MYC/CDK4/CDC25A/BCL2/E2F1/TP53/BAX/AKT1	8
hsa-miR-34a-5p	WP3303	RAC1/PAK1/p38/MMP2 Pathway	9.11362e-07	5.2327e-06	MYC/TP53/BIRC5/SRC/BAX/ERBB2/STMN1/AKT1/RAD51	9
hsa-miR-34a-5p	WP4313	Ferroptosis	2.07786e-06	1.14116e-05	TP53/ACSL4/ACSL1/PCBP2/CYBB/ATG5/ATG7	7
hsa-miR-34a-5p	WP2064	Neural Crest Differentiation	3.20312e-06	1.68585e-05	MYC/MYB/WNT1/AXIN2/DLL1/NOTCH1/NOTCH2/BMP7/HDAC1/SNAI1	10
hsa-miR-34a-5p	WP2374	Oncostatin M Signaling Pathway	6.67902e-06	3.37466e-05	MAP2K1/VEGFA/CEBPB/TP53/SRC/RICTOR/AKT1/FOS	8
hsa-miR-34a-5p	WP2848	Differentiation Pathway	7.41833e-06	3.60405e-05	WNT1/NOTCH1/VEGFA/CSF1R/KIT/IL6R/GDF5	7
hsa-miR-34a-5p	WP2032	Human Thyroid Stimulating Hormone (TSH) signaling pathway	8.38053e-06	3.92072e-05	MYC/CDK4/CCND3/MAP2K1/E2F1/SRC/AKT1/FOS	8
hsa-miR-34a-5p	WP1545	miRNAs involved in DNA damage response	9.81299e-06	4.42691e-05	MYC/CCND3/CDC25A/CDK6/CCND1/E2F1/TP53	7
hsa-miR-34a-5p	WP1742	TP53 Network	1.02352e-05	4.45817e-05	MYC/BCL2/TP53/CDKN2A/BAX	5
hsa-miR-34a-5p	WP3611	Photodynamic therapy-induced AP-1 survival signaling.	1.12316e-05	4.72911e-05	CCND1/BCL2/PDGFRA/TP53/CDKN2A/BAX/FOS	7
hsa-miR-34a-5p	WP3640	Imatinib and Chronic Myeloid Leukemia	1.327e-05	5.40714e-05	MYC/PDGFRA/PDGFRB/CSF1R/KIT	5
hsa-miR-34a-5p	WP3872	Regulation of Apoptosis by Parathyroid Hormone-related Protein	1.69637e-05	6.69621e-05	MYC/BCL2/BAX/PIK3CG/AKT1	5
hsa-miR-34a-5p	WP2857	Mesodermal Commitment Pathway	2.63275e-05	9.9259e-05	CCND1/AXIN2/DLL1/HNF4A/NANOG/SOX2/BMP7/SNAI1/KLF4/POU5F1/SMAD4	11
hsa-miR-34a-5p	WP2509	Nanoparticle triggered autophagic cell death	2.67172e-05	9.9259e-05	BCL2/ATG4A/ATG5/ATG7/BECN1	5
hsa-miR-34a-5p	WP127	IL-5 Signaling Pathway	2.92316e-05	0.000104988	MYC/BCL2/MAP2K1/PIK3CG/AKT1/FOS	6
hsa-miR-34a-5p	WP3981	miRNA regulation of prostate cancer signaling pathways	2.99216e-05	0.000104988	CCND1/BCL2/MAP2K1/TP53/AR/PDGFRB/TCF7	7
hsa-miR-34a-5p	WP304	Kit receptor signaling pathway	3.34494e-05	0.000113595	BCL2/MAP2K1/SNAI1/SRC/KIT/AKT1/FOS	7
hsa-miR-34a-5p	WP366	TGF-beta Signaling Pathway	3.41732e-05	0.000113595	MYC/MET/CCND1/MAP2K1/TP53/HDAC1/SRC/SMAD4/AKT1/FOS	10
hsa-miR-34a-5p	WP706	Sudden Infant Death Syndrome (SIDS) Susceptibility Pathways	3.95184e-05	0.000127413	MYB/VAMP2/VEGFA/CEBPB/NANOG/SOX2/HDAC1/AR/POU5F1/IL6R/KCNH2	11
hsa-miR-34a-5p	WP3658	Wnt/beta-catenin Signaling Pathway in Leukemia	4.03475e-05	0.000127413	MYC/CCND1/WNT1/AXIN2/AKT1	5
hsa-miR-34a-5p	WP306	Focal Adhesion	5.73784e-05	0.000176776	MET/CCND3/CCND1/BCL2/MAP2K1/VEGFA/PDGFRA/PDGFRB/SRC/ERBB2/AKT1/PPP1CC	12
hsa-miR-34a-5p	WP3651	Pathways Affected in Adenoid Cystic Carcinoma	6.2542e-05	0.000183722	MYC/MYB/MYCN/NOTCH1/TP53/ERBB2/AKT1	7
hsa-miR-34a-5p	WP3998	Prader-Willi and Angelman Syndrome	6.2542e-05	0.000183722	CDK4/CDK6/CCND1/MDM4/E2F1/TP53/CDKN2A	7
hsa-miR-34a-5p	WP3299	let-7 inhibition of ES cell reprogramming	6.40975e-05	0.000184012	MYC/SOX2/KLF4/POU5F1	4
hsa-miR-34a-5p	WP268	Notch Signaling Pathway	7.49441e-05	0.000210369	JAG1/DLL1/NOTCH1/NOTCH2/HDAC1/NUMB	6
hsa-miR-34a-5p	WP3969	H19 action Rb-E2F1 signaling and CDK-Beta-catenin activity	8.44538e-05	0.000227343	JAG1/CDK4/CCND1/E2F1	4
hsa-miR-34a-5p	WP2586	Aryl Hydrocarbon Receptor	8.45907e-05	0.000227343	MYC/MAP2K1/VEGFA/E2F1/SRC/AIP	6
hsa-miR-34a-5p	WP1772	Apoptosis Modulation and Signaling	9.07568e-05	0.000238834	BCL2/PEA15/TP53/CDKN2A/BIRC5/BAX/FOS/PRKD1	8
hsa-miR-34a-5p	WP3413	NOTCH1 regulation of human endothelial cell calcification	0.000138661	0.00035745	JAG1/DLL1/NOTCH1/VEGFA	4
hsa-miR-34a-5p	WP2406	Cardiac Progenitor Differentiation	0.000148705	0.000375676	NOTCH1/PDGFRA/NANOG/SOX2/POU5F1/KIT	6
hsa-miR-34a-5p	WP2037	Prolactin Signaling Pathway	0.000154807	0.000383422	MYC/MAP2K1/SRC/ERBB2/PIK3CG/AKT1/FOS	7
hsa-miR-34a-5p	WP4258	LncRNA involvement in canonical Wnt signaling and colorectal cancer	0.000185019	0.000449438	MYC/CCND3/CDK6/CCND1/WNT1/AXIN2/FOSL1/TCF7	8
hsa-miR-34a-5p	WP4239	Epithelial to mesenchymal transition in colorectal cancer	0.000199968	0.000476586	JAG1/WNT1/DLL1/NOTCH1/MAP2K1/NOTCH2/TP53/SNAI1/SMAD4/AKT1	10
hsa-miR-34a-5p	WP3614	Photodynamic therapy-induced HIF-1 survival signaling	0.000233717	0.000546706	VEGFA/TP53/LDHA/BIRC5/BAX	5
hsa-miR-34a-5p	WP3888	VEGFA-VEGFR2 Signaling Pathway	0.000272976	0.00062693	JAG1/CCND1/BCL2/MAP2K1/VEGFA/HDAC1/SRC/RICTOR/AKT1/PRKD1/NR4A2/RCAN1	12
hsa-miR-34a-5p	WP254	Apoptosis	0.000335539	0.000756854	MYC/BCL2/TP53/CDKN2A/BIRC5/BAX/AKT1	7
hsa-miR-34a-5p	WP712	Estrogen signaling pathway	0.000378154	0.000838015	BCL2/MAP2K1/AKT1/FOS	4
hsa-miR-34a-5p	WP49	IL-2 Signaling Pathway	0.000429109	0.000934539	MYC/BCL2/MAP2K1/AKT1/FOS	5
hsa-miR-34a-5p	WP1539	Angiogenesis	0.000448441	0.000960089	VEGFA/PDGFRA/SRC/AKT1	4
hsa-miR-34a-5p	WP138	Androgen receptor signaling pathway	0.000474678	0.00098294	CCND1/SIRT1/HDAC1/AR/SRC/SMAD4/AKT1	7
hsa-miR-34a-5p	WP673	ErbB Signaling Pathway	0.000474678	0.00098294	MYC/CCND1/MAP2K1/TP53/SRC/ERBB2/AKT1	7
hsa-miR-34a-5p	WP205	IL-7 Signaling Pathway	0.000527575	0.00107193	MYC/CCND1/MAP2K1/AKT1	4
hsa-miR-34a-5p	WP2332	Interleukin-11 Signaling Pathway	0.000534627	0.00107193	BCL2/MAP2K1/BIRC5/SRC/AKT1	5
hsa-miR-34a-5p	WP3680	Association Between Physico-Chemical Features and Toxicity Associated Pathways	0.000588439	0.00116139	MYC/MAP2K1/SRC/ERBB2/PIK3CG/AKT1	6
hsa-miR-34a-5p	WP2878	PPAR Alpha Pathway	0.000616162	0.00117926	MYC/CDK4/CCND1/PPARA	4
hsa-miR-34a-5p	WP581	EPO Receptor Signaling	0.000616162	0.00117926	MAP2K1/SRC/PIK3CG/AKT1	4
hsa-miR-34a-5p	WP3845	Canonical and Non-canonical Notch signaling	0.000714814	0.00134765	JAG1/DLL1/NOTCH1/NOTCH2	4
hsa-miR-34a-5p	WP2249	Metastatic brain tumor	0.000824145	0.00153092	MYC/CDK6/E2F3/TP53	4
hsa-miR-34a-5p	WP286	IL-3 Signaling Pathway	0.00088327	0.00161697	BCL2/MAP2K1/SRC/AKT1/FOS	5
hsa-miR-34a-5p	WP2034	Leptin signaling pathway	0.00106435	0.00191665	CCND1/MAP2K1/SRC/BAX/ERBB2/AKT1	6
hsa-miR-34a-5p	WP2870	Extracellular vesicle-mediated signaling in recipient cells	0.00107732	0.00191665	MET/SMAD4/ERBB2/AKT1	4
hsa-miR-34a-5p	WP363	Wnt Signaling Pathway	0.00126611	0.00222124	MYC/CDK6/CCND1/AXIN2/AKT1	5
hsa-miR-34a-5p	WP2018	RANKL/RANK (Receptor activator of NFKB (ligand)) Signaling Pathway	0.00149797	0.00255699	MAP2K1/SPI1/SRC/AKT1/FOS	5
hsa-miR-34a-5p	WP3959	DNA IR-Double Strand Breaks (DSBs) and cellular response via ATM	0.00149797	0.00255699	E2F1/TP53/CDKN2A/BAX/RAD51	5
hsa-miR-34a-5p	WP3644	NAD+ metabolism	0.00172862	0.00289033	SIRT1/NAMPT/SIRT7	3
hsa-miR-34a-5p	WP313	Signaling of Hepatocyte Growth Factor Receptor	0.00173901	0.00289033	MET/MAP2K1/SRC/FOS	4
hsa-miR-34a-5p	WP2853	Endoderm Differentiation	0.00177921	0.00291874	NOTCH1/NANOG/SOX2/BMP7/KDM4A/POU5F1/SMAD4/TCF7	8
hsa-miR-34a-5p	WP3971	Role of Osx and miRNAs in tooth development	0.00215736	0.0034937	NOTCH1/NOTCH2/BMP7/KLF4	4
hsa-miR-34a-5p	WP2840	Hair Follicle Development: Cytodifferentiation (Part 3 of 3)	0.00227432	0.00359104	NOTCH1/NOTCH2/SOX2/GAS1/SMAD4/FOS	6
hsa-miR-34a-5p	WP4336	ncRNAs involved in Wnt signaling in hepatocellular carcinoma	0.00227432	0.00359104	MYC/CCND3/CCND1/WNT1/FOSL1/TCF7	6
hsa-miR-34a-5p	WP3931	ESC Pluripotency Pathways	0.00231281	0.00360673	WNT1/MAP2K1/PDGFRA/PDGFRB/SMAD4/AKT1/FOS	7
hsa-miR-34a-5p	WP3859	TGF-B Signaling in Thyroid Cells for Epithelial-Mesenchymal Transition	0.00246305	0.00379417	SNAI1/SMAD4/AKT1	3
hsa-miR-34a-5p	WP2849	Hematopoietic Stem Cell Differentiation	0.00274657	0.00417994	MYB/NOTCH1/SPI1/KCNH2/FOS	5
hsa-miR-34a-5p	WP3287	Overview of nanoparticle effects	0.00289232	0.00422189	CCND3/BCL2/BAX	3
hsa-miR-34a-5p	WP170	Nuclear Receptors	0.00290783	0.00422189	HNF4A/AR/PPARA/NR4A2	4
hsa-miR-34a-5p	WP2526	PDGF Pathway	0.00290783	0.00422189	MAP2K1/PDGFRB/SRC/FOS	4
hsa-miR-34a-5p	WP4320	The effect of progerin on the involved genes in Hutchinson-Gilford Progeria Syndrome	0.00290783	0.00422189	E2F1/TP53/MTA2/HDAC1	4
hsa-miR-34a-5p	WP2355	Corticotropin-releasing hormone signaling pathway	0.00300731	0.00431671	BCL2/MAP2K1/FOSL1/AKT1/FOS/NR4A2	6
hsa-miR-34a-5p	WP2516	ATM Signaling Pathway	0.00319313	0.00453194	CDC25A/MDM4/TP53/RAD51	4
hsa-miR-34a-5p	WP3927	BMP Signaling Pathway in Eyelid Development	0.0033649	0.00467077	NOTCH1/INHBB/SMAD4	3
hsa-miR-34a-5p	WP4206	Hereditary leiomyomatosis and renal cell carcinoma pathway	0.0033649	0.00467077	VEGFA/TP53/LDHA	3
hsa-miR-34a-5p	WP437	EGF/EGFR Signaling Pathway	0.00367295	0.00504295	MAP2K1/E2F1/SRC/RICTOR/ERBB2/STMN1/AKT1/FOS	8
hsa-miR-34a-5p	WP364	IL-6 signaling pathway	0.00416248	0.00565362	MAP2K1/HDAC1/IL6R/AKT1	4
hsa-miR-34a-5p	WP3645	NAD+ biosynthetic pathways	0.00444514	0.00591044	SIRT1/NAMPT/SIRT7	3
hsa-miR-34a-5p	WP4141	PI3K/AKT/mTOR - VitD3 Signalling	0.00444514	0.00591044	MYC/LDHA/AKT1	3
hsa-miR-34a-5p	WP2203	Thymic Stromal LymphoPoietin (TSLP) Signaling Pathway	0.00574013	0.0075528	MYC/MAP2K1/SRC/AKT1	4
hsa-miR-34a-5p	WP3932	Focal Adhesion-PI3K-Akt-mTOR-signaling pathway	0.00776089	0.0101064	MET/MAP2K1/VEGFA/IFNB1/PDGFRA/PDGFRB/CSF1R/KIT/IL6R/PIK3CG/AKT1	11
hsa-miR-34a-5p	WP428	Wnt Signaling Pathway	0.00955554	0.0123165	MYC/CCND3/CCND1/WNT1/FOSL1/TCF7	6
hsa-miR-34a-5p	WP3972	PDGFR-beta pathway	0.00975624	0.012411	MAP2K1/PDGFRB/FOS	3
hsa-miR-34a-5p	WP4298	Viral Acute Myocarditis	0.00982539	0.012411	CCND1/BCL2/SRC/BAX/AKT1	5
hsa-miR-34a-5p	WP395	IL-4 Signaling Pathway	0.00999466	0.0124998	CEBPB/BIRC5/AKT1/FOS	4
hsa-miR-34a-5p	WP2431	Spinal Cord Injury	0.0103356	0.0127995	MYC/CDK4/CCND1/E2F1/TP53/FOS	6
hsa-miR-34a-5p	WP2855	Dopaminergic Neurogenesis	0.0107206	0.0129981	WNT1/SOX2/NR4A2	3
hsa-miR-34a-5p	WP3844	PI3K-AKT-mTOR signaling pathway and therapeutic opportunities	0.0107206	0.0129981	RICTOR/PIK3CG/AKT1	3
hsa-miR-34a-5p	WP4018	Pathways in clear cell renal cell carcinoma	0.0108047	0.0129981	VEGFA/PDGFRA/LDHA/PDGFRB/AKT1	5
hsa-miR-34a-5p	WP2854	Gene regulatory network modelling somitogenesis	0.0118573	0.0139407	DLL1/NOTCH1	2
hsa-miR-34a-5p	WP3630	NAD metabolism, sirtuins and aging	0.0118573	0.0139407	SIRT1/NAMPT	2
hsa-miR-34a-5p	WP481	Insulin Signaling	0.0119193	0.0139407	VAMP2/MAP2K1/MAP3K9/PIK3CG/AKT1/FLOT2/FOS	7
hsa-miR-34a-5p	WP4205	MET in type 1 papillary renal cell carcinoma	0.0127291	0.0147512	MET/MAP2K1/SRC/AKT1	4
hsa-miR-34a-5p	WP3527	Preimplantation Embryo	0.0134802	0.0154797	NANOG/SOX2/KLF4/POU5F1	4
hsa-miR-34a-5p	WP4204	Tumor suppressor activity of SMARCB1	0.0139354	0.0158582	CDK4/CDK6/CDKN2A	3
hsa-miR-34a-5p	WP3672	LncRNA-mediated mechanisms of therapeutic resistance	0.0140868	0.0158873	TP53/HOTAIR	2
hsa-miR-34a-5p	WP3584	MECP2 and Associated Rett Syndrome	0.0150659	0.0166031	E2F1/HDAC1/FUT8/AKT1	4
hsa-miR-34a-5p	WP3863	T-Cell antigen Receptor (TCR) pathway during Staphylococcus aureus infection	0.0150659	0.0166031	CDK4/MAP2K1/AKT1/FOS	4
hsa-miR-34a-5p	WP3676	BDNF-TrkB Signaling	0.0151157	0.0166031	MAP2K1/PIK3CG/AKT1	3
hsa-miR-34a-5p	WP3915	Angiopoietin Like Protein 8 Regulatory Pathway	0.0159919	0.017414	MAP2K1/MAP3K9/RICTOR/PIK3CG/AKT1/FLOT2	6
hsa-miR-34a-5p	WP3617	Photodynamic therapy-induced NF-kB survival signaling	0.0163509	0.0176528	CCND1/VEGFA/BIRC5	3
hsa-miR-34a-5p	WP23	B Cell Receptor Signaling Pathway	0.0174002	0.0186265	MYC/E2F3/MAP2K1/PIK3CG/AKT1	5
hsa-miR-34a-5p	WP2324	AGE/RAGE pathway	0.0185797	0.019722	MAP2K1/SRC/INHBB/AKT1	4
hsa-miR-34a-5p	WP619	Type II interferon signaling (IFNG)	0.0189869	0.0198738	IFNB1/SPI1/CYBB	3
hsa-miR-34a-5p	WP322	Osteoblast Signaling	0.0190375	0.0198738	PDGFRA/PDGFRB	2
hsa-miR-34a-5p	WP2447	Amyotrophic lateral sclerosis (ALS)	0.020388	0.0209376	BCL2/TP53/BAX	3
hsa-miR-34a-5p	WP4136	Fibrin Complement Receptor 3 Signaling Pathway	0.020388	0.0209376	IFNB1/SRC/AKT1	3
hsa-miR-34a-5p	WP75	Toll-like Receptor Signaling Pathway	0.0211259	0.0215205	MAP2K1/IFNB1/PIK3CG/AKT1/FOS	5
hsa-miR-34a-5p	WP1403	AMP-activated Protein Kinase (AMPK) Signaling	0.0215232	0.0217497	HNF4A/TP53/PIK3CG/AKT1	4
hsa-miR-34a-5p	WP4223	Ras Signaling	0.0244471	0.0245084	MET/MAP2K1/PDGFRA/PDGFRB/CSF1R/KIT/AKT1	7
hsa-miR-34a-5p	WP2572	Primary Focal Segmental Glomerulosclerosis FSGS	0.0270337	0.0268881	JAG1/WNT1/NOTCH1/AKT1	4
hsa-miR-34a-5p	WP368	Mitochondrial LC-Fatty Acid Beta-Oxidation	0.0276119	0.0270374	ACSL4/ACSL1	2
hsa-miR-34a-5p	WP3935	Leptin Insulin Overlap	0.0276119	0.0270374	PIK3CG/AKT1	2
hsa-miR-34a-5p	WP4249	Hedgehog Signaling Pathway	0.0299615	0.0291124	CCND1/BCL2/GAS1	3
hsa-miR-34a-5p	WP3879	4-hydroxytamoxifen, Dexamethasone, and Retinoic Acids Regulation of p27 Expression	0.0307555	0.0296558	MAP2K1/AKT1	2
hsa-miR-34a-5p	WP1591	Heart Development	0.0335955	0.0321488	NOTCH1/VEGFA/SMAD4	3
hsa-miR-34a-5p	WP2011	SREBF and miR33 in cholesterol and lipid homeostasis	0.0340336	0.0323231	SIRT1/PPARA	2
hsa-miR-34a-5p	WP2507	Nanomaterial induced apoptosis	0.0374412	0.0347818	BCL2/BAX	2
hsa-miR-34a-5p	WP1541	Energy Metabolism	0.0374484	0.0347818	SIRT1/HDAC1/PPARA	3
hsa-miR-34a-5p	WP2873	Aryl Hydrocarbon Receptor Pathway	0.0374484	0.0347818	SRC/BAX/AIP	3
hsa-miR-34a-5p	WP382	MAPK Signaling Pathway	0.0379383	0.0349796	MYC/MAP2K1/TP53/PDGFRB/CACNB3/STMN1/AKT1/FOS	8
hsa-miR-34a-5p	WP2038	Regulation of Microtubule Cytoskeleton	0.0394563	0.0361156	SRC/STMN1/AKT1	3
hsa-miR-34a-5p	WP3594	Circadian rythm related genes	0.0403577	0.036675	CDK4/SIRT1/TP53/HDAC1/NAMPT/PPARA/PPP1CC	7
hsa-miR-34a-5p	WP2637	Structural Pathway of Interleukin 1 (IL-1)	0.0415181	0.0374599	MYC/MAP2K1/FOS	3
hsa-miR-34a-5p	WP357	Fatty Acid Biosynthesis	0.0446266	0.0396975	ACSL4/ACSL1	2
hsa-miR-34a-5p	WP3657	Hematopoietic Stem Cell Gene Regulation by GABP alpha/beta Complex	0.0446266	0.0396975	BCL2/SMAD4	2
hsa-miR-34a-5p	WP2267	Synaptic Vesicle Pathway	0.0458017	0.0404579	VAMP2/SYT1/STX1A	3
hsa-miR-34a-5p	WP4357	NRF2-ARE regulation	0.0483953	0.042452	CEBPB/SRC	2
hsa-miR-34a-5p	WP2864	Apoptosis-related network due to altered Notch3 in ovarian cancer	0.050296	0.0435149	HDAC1/BIRC5/AKT1	3
hsa-miR-34a-5p	WP3286	Copper homeostasis	0.050296	0.0435149	CCND1/TP53/AKT1	3
hsa-miR-34a-5p	WP236	Adipogenesis	0.0514564	0.044216	WNT1/E2F1/CEBPB/NAMPT/PPARA	5
hsa-miR-34a-5p	WP2895	Differentiation of white and brown adipocyte	0.0562629	0.0476972	CEBPB/BMP7	2
hsa-miR-34a-5p	WP3668	Hypothesized Pathways in Pathogenesis of Cardiovascular Disease	0.0562629	0.0476972	SMAD4/AGTR1	2
hsa-miR-34a-5p	WP2795	Cardiac Hypertrophic Response	0.0574246	0.0483576	MAP2K1/AKT1/PRKD1	3
hsa-miR-34a-5p	WP560	TGF-beta Receptor Signaling	0.0599021	0.0501098	WNT1/SMAD4/FOS	3
hsa-miR-34a-5p	WP2035	Follicle Stimulating Hormone (FSH) signaling pathway	0.0645428	0.0536366	SRC/AKT1	2
hsa-miR-34a-5p	WP1544	MicroRNAs in cardiomyocyte hypertrophy	0.0723727	0.059656	MAP2K1/PIK3CG/AKT1/RCAN1	4
hsa-miR-34a-5p	WP1449	Regulation of toll-like receptor signaling pathway	0.0730101	0.059656	MAP2K1/IFNB1/PIK3CG/AKT1/FOS	5
hsa-miR-34a-5p	WP2643	Nanoparticle-mediated activation of receptor signaling	0.0732028	0.059656	MAP2K1/SRC	2
hsa-miR-34a-5p	WP474	Endochondral Ossification	0.0786027	0.0636459	VEGFA/BMP7/AKT1	3
hsa-miR-34a-5p	WP2112	IL17 signaling pathway	0.0822126	0.0657263	CEBPB/AKT1	2
hsa-miR-34a-5p	WP3850	Factors and pathways affecting insulin-like growth factor (IGF1)-Akt signaling	0.0822126	0.0657263	PIK3CG/AKT1	2
hsa-miR-34a-5p	WP3942	PPAR signaling pathway	0.0843639	0.067022	ACSL4/ACSL1/PPARA	3
hsa-miR-34a-5p	WP34	Ovarian Infertility Genes	0.0868395	0.0685575	CDK4/CEBPB	2
hsa-miR-34a-5p	WP2363	Gastric Cancer Network 2	0.0915429	0.0713785	MYC/TP53	2
hsa-miR-34a-5p	WP4149	White fat cell differentiation	0.0915429	0.0713785	CEBPB/KLF4	2
hsa-miR-34a-5p	WP143	Fatty Acid Beta Oxidation	0.0963196	0.0737375	ACSL4/ACSL1	2
hsa-miR-34a-5p	WP3982	miRNA regulation of p53 pathway in prostate cancer	0.0963196	0.0737375	TP53/BAX	2
hsa-miR-34a-5p	WP400	p38 MAPK Signaling Pathway	0.0963196	0.0737375	MYC/MAP3K9	2
hsa-miR-34a-5p	WP244	Alpha 6 Beta 4 signaling pathway	0.101166	0.0769813	SRC/AKT1	2
hsa-miR-34a-5p	WP1982	Sterol Regulatory Element-Binding Proteins (SREBP) signalling	0.102682	0.0776668	SIRT1/YY1/AKT1	3
hsa-miR-34a-5p	WP1471	Target Of Rapamycin (TOR) Signaling	0.111056	0.0830068	RICTOR/AKT1	2
hsa-miR-34a-5p	WP3995	Prion disease pathway	0.111056	0.0830068	BCL2/SPI1	2
hsa-miR-34a-5p	WP2882	Nuclear Receptors Meta-Pathway	0.121815	0.0905126	MYC/CDK4/CCND1/SRC/POU5F1/BAX/PPARA/AIP	8
hsa-miR-34a-5p	WP3937	Microglia Pathogen Phagocytosis Pathway	0.126337	0.0933236	CYBB/PIK3CG	2
hsa-miR-34a-5p	WP3941	Oxidative Damage	0.131537	0.0966003	BCL2/MAP3K9	2
hsa-miR-34a-5p	WP4016	DNA IR-damage and cellular response via ATR	0.136312	0.0987334	E2F1/TP53/RAD51	3
hsa-miR-34a-5p	WP2036	TNF related weak inducer of apoptosis (TWEAK) Signaling Pathway	0.136787	0.0987334	HDAC1/AKT1	2
hsa-miR-34a-5p	WP2636	Common Pathways Underlying Drug Addiction	0.136787	0.0987334	MAP2K1/PPP1CC	2
hsa-miR-34a-5p	WP4269	Ethanol metabolism resulting in production of ROS by CYP2E1	0.144216	0.103504	MAP2K1	1
hsa-miR-34a-5p	WP1455	Serotonin Transporter Activity	0.157452	0.111734	STX1A	1
hsa-miR-34a-5p	WP4147	PTF1A related regulatory pathway	0.157452	0.111734	NOTCH1	1
hsa-miR-34a-5p	WP2328	Allograft Rejection	0.161814	0.114188	VEGFA/PDGFRA/AGTR1	3
hsa-miR-34a-5p	WP69	T-Cell antigen Receptor (TCR) Signaling Pathway	0.16557	0.11619	MAP2K1/AKT1/FOS	3
hsa-miR-34a-5p	WP1425	Bone Morphogenic Protein (BMP) Signalling and Regulation	0.170485	0.118324	SMAD4	1
hsa-miR-34a-5p	WP1559	TFs Regulate miRNAs related to cardiac hypertrophy	0.170485	0.118324	AKT1	1
hsa-miR-34a-5p	WP2023	Cell Differentiation - Index expanded	0.180231	0.119979	SOX2/KLF4	2
hsa-miR-34a-5p	WP2380	Brain-Derived Neurotrophic Factor (BDNF) signaling pathway	0.182308	0.119979	MAP2K1/SRC/AKT1/FOS	4
hsa-miR-34a-5p	WP2858	Ectoderm Differentiation	0.182308	0.119979	MYC/WNT1/SOX2/SMAD4	4
hsa-miR-34a-5p	WP1434	Osteopontin Signaling	0.183318	0.119979	MAP2K1	1
hsa-miR-34a-5p	WP186	Homologous recombination	0.183318	0.119979	RAD51	1
hsa-miR-34a-5p	WP1991	SRF and miRs in Smooth Muscle Differentiation and Proliferation	0.183318	0.119979	KLF4	1
hsa-miR-34a-5p	WP2881	Estrogen Receptor Pathway	0.183318	0.119979	PPARA	1
hsa-miR-34a-5p	WP3871	Valproic acid pathway	0.183318	0.119979	HDAC1	1
hsa-miR-34a-5p	WP3892	Development of pulmonary dendritic cells and macrophage subsets	0.183318	0.119979	SPI1	1
hsa-miR-34a-5p	WP3944	Serotonin and anxiety-related events	0.183318	0.119979	FOS	1
hsa-miR-34a-5p	WP4211	Transcriptional cascade regulating adipogenesis	0.183318	0.119979	CEBPB	1
hsa-miR-34a-5p	WP51	Regulation of Actin Cytoskeleton	0.204367	0.133066	MAP2K1/PDGFRA/PDGFRB/PIK3CG	4
hsa-miR-34a-5p	WP3	Phytochemical activity on NRF2 transcriptional activation	0.208399	0.134995	CEBPB	1
hsa-miR-34a-5p	WP185	Integrin-mediated Cell Adhesion	0.216506	0.139359	MAP2K1/SRC/AKT1	3
hsa-miR-34a-5p	WP195	IL-1 signaling pathway	0.219708	0.139359	MAP2K1/AKT1	2
hsa-miR-34a-5p	WP12	Osteoclast Signaling	0.220651	0.139359	IFNB1	1
hsa-miR-34a-5p	WP1946	Cori Cycle	0.220651	0.139359	LDHA	1
hsa-miR-34a-5p	WP4210	Tryptophan catabolism leading to NAD+ production	0.220651	0.139359	NAMPT	1
hsa-miR-34a-5p	WP3874	Canonical and Non-Canonical TGF-B signaling	0.232716	0.144071	SMAD4	1
hsa-miR-34a-5p	WP3947	Serotonin and anxiety	0.232716	0.144071	FOS	1
hsa-miR-34a-5p	WP4337	ncRNAs involved in STAT3 signaling in hepatocellular carcinoma	0.232716	0.144071	IL6R	1
hsa-miR-34a-5p	WP554	ACE Inhibitor Pathway	0.232716	0.144071	AGTR1	1
hsa-miR-34a-5p	WP4396	Nonalcoholic fatty liver disease	0.233815	0.144071	IL6R/BAX/PPARA/AKT1	4
hsa-miR-34a-5p	WP3865	RIG-I-like Receptor Signaling	0.2426	0.148758	IFNB1/ATG5	2
hsa-miR-34a-5p	WP3664	Regulation of Wnt/B-catenin Signaling by Small Molecule Compounds	0.244597	0.149258	WNT1	1
hsa-miR-34a-5p	WP3929	Chemokine signaling pathway	0.250613	0.152194	MAP2K1/CCL22/PIK3CG/AKT1	4
hsa-miR-34a-5p	WP3624	Lung fibrosis	0.254091	0.153431	CEBPB/BMP7	2
hsa-miR-34a-5p	WP22	IL-9 Signaling Pathway	0.256294	0.153431	MAP2K1	1
hsa-miR-34a-5p	WP734	Serotonin Receptor 4/6/7 and NR3C Signaling	0.256294	0.153431	MAP2K1	1
hsa-miR-34a-5p	WP516	Hypertrophy Model	0.267813	0.158822	VEGFA	1
hsa-miR-34a-5p	WP732	Serotonin Receptor 2 and ELK-SRF/GATA4 signaling	0.267813	0.158822	MAP2K1	1
hsa-miR-34a-5p	WP3670	Simplified Interaction Map Between LOXL4 and Oxidative Stress Pathway	0.279155	0.164774	SIRT1	1
hsa-miR-34a-5p	WP3599	Transcription factor regulation in adipogenesis	0.290323	0.170569	CEBPB	1
hsa-miR-34a-5p	WP262	EBV LMP1 signaling	0.312148	0.181701	IFNB1	1
hsa-miR-34a-5p	WP3612	Photodynamic therapy-induced NFE2L2 (NRF2) survival signaling	0.312148	0.181701	FOS	1
hsa-miR-34a-5p	WP1528	Physiological and Pathological Hypertrophy of the Heart	0.32281	0.186562	FOS	1
hsa-miR-34a-5p	WP2877	Vitamin D Receptor Pathway	0.323451	0.186562	MYC/CCND1/CDKN2A/KLF4	4
hsa-miR-34a-5p	WP2118	Arrhythmogenic Right Ventricular Cardiomyopathy	0.328642	0.188694	TCF7/CACNB3	2
hsa-miR-34a-5p	WP26	Signal Transduction of S1P Receptor	0.333308	0.190507	AKT1	1
hsa-miR-34a-5p	WP530	Cytokines and Inflammatory Response	0.343645	0.195531	IFNB1	1
hsa-miR-501-5p	WP4336	ncRNAs involved in Wnt signaling in hepatocellular carcinoma	2.49992e-06	3.62707e-05	DKK1/NKD1/GSK3B	3
hsa-miR-501-5p	WP4258	LncRNA involvement in canonical Wnt signaling and colorectal cancer	4.14855e-06	3.62707e-05	DKK1/NKD1/GSK3B	3
hsa-miR-501-5p	WP428	Wnt Signaling Pathway	6.08067e-06	3.62707e-05	DKK1/NKD1/GSK3B	3
hsa-miR-501-5p	WP3658	Wnt/beta-catenin Signaling Pathway in Leukemia	4.73331e-05	0.000211753	DKK1/GSK3B	2
hsa-miR-501-5p	WP2406	Cardiac Progenitor Differentiation	0.000200127	0.000716245	DKK1/GSK3B	2
hsa-miR-501-5p	WP399	Wnt Signaling Pathway and Pluripotency	0.00081895	0.00244248	NKD1/GSK3B	2
hsa-miR-501-5p	WP3888	VEGFA-VEGFR2 Signaling Pathway	0.00401669	0.0102682	DKK1/GSK3B	2
hsa-miR-501-5p	WP3876	BMP2-WNT4-FOXO1 Pathway in Human Primary Endometrial Stromal Cell Differentiation	0.00607191	0.0129995	DKK1	1
hsa-miR-501-5p	WP3930	EDA Signalling in Hair Follicle Development	0.00653796	0.0129995	DKK1	1
hsa-miR-501-5p	WP3664	Regulation of Wnt/B-catenin Signaling by Small Molecule Compounds	0.0084007	0.0143541	GSK3B	1
hsa-miR-501-5p	WP3872	Regulation of Apoptosis by Parathyroid Hormone-related Protein	0.0102611	0.0143541	GSK3B	1
hsa-miR-501-5p	WP4141	PI3K/AKT/mTOR - VitD3 Signalling	0.0102611	0.0143541	GSK3B	1
hsa-miR-501-5p	WP4357	NRF2-ARE regulation	0.0107259	0.0143541	GSK3B	1
hsa-miR-501-5p	WP205	IL-7 Signaling Pathway	0.0116549	0.0143541	GSK3B	1
hsa-miR-501-5p	WP2583	T-Cell Receptor and Co-stimulatory Signaling	0.0135112	0.0143541	GSK3B	1
hsa-miR-501-5p	WP3844	PI3K-AKT-mTOR signaling pathway and therapeutic opportunities	0.013975	0.0143541	GSK3B	1
hsa-miR-501-5p	WP2112	IL17 signaling pathway	0.0144385	0.0143541	GSK3B	1
hsa-miR-501-5p	WP3850	Factors and pathways affecting insulin-like growth factor (IGF1)-Akt signaling	0.0144385	0.0143541	GSK3B	1
hsa-miR-501-5p	WP3971	Role of Osx and miRNAs in tooth development	0.0167542	0.0149049	DKK1	1
hsa-miR-501-5p	WP127	IL-5 Signaling Pathway	0.0186042	0.0149049	GSK3B	1
hsa-miR-501-5p	WP500	Glycogen Metabolism	0.0186042	0.0149049	GSK3B	1
hsa-miR-501-5p	WP2036	TNF related weak inducer of apoptosis (TWEAK) Signaling Pathway	0.0195283	0.0149049	GSK3B	1
hsa-miR-501-5p	WP3298	Melatonin metabolism and effects	0.0195283	0.0149049	GSK3B	1
hsa-miR-501-5p	WP364	IL-6 signaling pathway	0.0199901	0.0149049	GSK3B	1
hsa-miR-501-5p	WP1541	Energy Metabolism	0.0222971	0.0150833	GSK3B	1
hsa-miR-501-5p	WP2848	Differentiation Pathway	0.0222971	0.0150833	DKK1	1
hsa-miR-501-5p	WP2038	Regulation of Microtubule Cytoskeleton	0.0227581	0.0150833	GSK3B	1
hsa-miR-501-5p	WP363	Wnt Signaling Pathway	0.0246005	0.0153665	GSK3B	1
hsa-miR-501-5p	WP3286	Copper homeostasis	0.0250607	0.0153665	GSK3B	1
hsa-miR-501-5p	WP2795	Cardiac Hypertrophic Response	0.0264405	0.0153665	GSK3B	1
hsa-miR-501-5p	WP3981	miRNA regulation of prostate cancer signaling pathways	0.0273597	0.0153665	GSK3B	1
hsa-miR-501-5p	WP3863	T-Cell antigen Receptor (TCR) pathway during Staphylococcus aureus infection	0.0287374	0.0153665	GSK3B	1
hsa-miR-501-5p	WP4155	Endometrial cancer	0.0291963	0.0153665	GSK3B	1
hsa-miR-501-5p	WP61	Notch Signaling Pathway	0.0291963	0.0153665	GSK3B	1
hsa-miR-501-5p	WP3680	Association Between Physico-Chemical Features and Toxicity Associated Pathways	0.0314889	0.0160996	GSK3B	1
hsa-miR-501-5p	WP2572	Primary Focal Segmental Glomerulosclerosis FSGS	0.0342351	0.0161279	DKK1	1
hsa-miR-501-5p	WP4216	Chromosomal and microsatellite instability in colorectal cancer	0.0342351	0.0161279	GSK3B	1
hsa-miR-501-5p	WP2034	Leptin signaling pathway	0.0351494	0.0161279	GSK3B	1
hsa-miR-501-5p	WP2037	Prolactin Signaling Pathway	0.0351494	0.0161279	GSK3B	1
hsa-miR-501-5p	WP4298	Viral Acute Myocarditis	0.0392564	0.0174463	GSK3B	1
hsa-miR-501-5p	WP2840	Hair Follicle Development: Cytodifferentiation (Part 3 of 3)	0.0406228	0.0174463	DKK1	1
hsa-miR-501-5p	WP138	Androgen receptor signaling pathway	0.0419879	0.0174463	GSK3B	1
hsa-miR-501-5p	WP673	ErbB Signaling Pathway	0.0419879	0.0174463	GSK3B	1
hsa-miR-501-5p	WP2355	Corticotropin-releasing hormone signaling pathway	0.0428973	0.0174463	GSK3B	1
hsa-miR-501-5p	WP23	B Cell Receptor Signaling Pathway	0.0451682	0.017888	GSK3B	1
hsa-miR-501-5p	WP1544	MicroRNAs in cardiomyocyte hypertrophy	0.0469823	0.017888	GSK3B	1
hsa-miR-501-5p	WP2064	Neural Crest Differentiation	0.0469823	0.017888	GSK3B	1
hsa-miR-501-5p	WP615	Senescence and Autophagy in Cancer	0.0496992	0.0185282	GSK3B	1
hsa-miR-501-5p	WP710	DNA Damage Response (only ATM dependent)	0.0528623	0.0193053	GSK3B	1
hsa-miR-501-5p	WP3931	ESC Pluripotency Pathways	0.0546667	0.0195649	GSK3B	1
hsa-miR-501-5p	WP179	Cell Cycle	0.0560184	0.0196556	GSK3B	1
hsa-miR-501-5p	WP3915	Angiopoietin Like Protein 8 Regulatory Pathway	0.060515	0.020825	GSK3B	1
hsa-miR-501-5p	WP2380	Brain-Derived Neurotrophic Factor (BDNF) signaling pathway	0.065892	0.0220758	GSK3B	1
hsa-miR-501-5p	WP2853	Endoderm Differentiation	0.0667862	0.0220758	DKK1	1
hsa-miR-501-5p	WP2059	Alzheimers Disease	0.0685728	0.0220758	GSK3B	1
hsa-miR-501-5p	WP2857	Mesodermal Commitment Pathway	0.0716939	0.0220758	DKK1	1
hsa-miR-501-5p	WP4262	Breast cancer pathway	0.0716939	0.0220758	GSK3B	1
hsa-miR-501-5p	WP4396	Nonalcoholic fatty liver disease	0.0730294	0.0220758	GSK3B	1
hsa-miR-501-5p	WP481	Insulin Signaling	0.0734743	0.0220758	GSK3B	1
hsa-miR-501-5p	WP4239	Epithelial to mesenchymal transition in colorectal cancer	0.074808	0.0220758	GSK3B	1
hsa-miR-501-5p	WP3929	Chemokine signaling pathway	0.0752523	0.0220758	GSK3B	1
hsa-miR-501-5p	WP306	Focal Adhesion	0.0915918	0.0264357	GSK3B	1
hsa-miR-501-5p	WP3594	Circadian rythm related genes	0.093785	0.026639	GSK3B	1
hsa-miR-501-5p	WP3932	Focal Adhesion-PI3K-Akt-mTOR-signaling pathway	0.137758	0.038518	GSK3B	1
hsa-miR-501-5p	WP4172	PI3K-Akt Signaling Pathway	0.152932	0.0421027	GSK3B	1
hsa-miR-874-3p	WP22	IL-9 Signaling Pathway	0.000123954	0.00417528	STAT3/CDK9	2
hsa-miR-874-3p	WP3414	Initiation of transcription and translation elongation at the HIV-1 LTR	0.000479158	0.0072763	HDAC1/CDK9	2
hsa-miR-874-3p	WP364	IL-6 signaling pathway	0.000648045	0.0072763	HDAC1/STAT3	2
hsa-miR-874-3p	WP61	Notch Signaling Pathway	0.00138993	0.0102714	HDAC1/STAT3	2
hsa-miR-874-3p	WP4255	Non-small cell lung cancer	0.00152466	0.0102714	STAT3/E2F3	2
hsa-miR-874-3p	WP2446	Retinoblastoma Gene in Cancer	0.00269602	0.0121282	HDAC1/E2F3	2
hsa-miR-874-3p	WP4263	Pancreatic adenocarcinoma pathway	0.00275684	0.0121282	STAT3/E2F3	2
hsa-miR-874-3p	WP138	Androgen receptor signaling pathway	0.00288045	0.0121282	HDAC1/STAT3	2
hsa-miR-874-3p	WP1544	MicroRNAs in cardiomyocyte hypertrophy	0.00360659	0.0134984	STAT3/CDK9	2
hsa-miR-874-3p	WP179	Cell Cycle	0.00512484	0.0172626	HDAC1/E2F3	2
hsa-miR-874-3p	WP1559	TFs Regulate miRNAs related to cardiac hypertrophy	0.0111826	0.0291363	STAT3	1
hsa-miR-874-3p	WP2881	Estrogen Receptor Pathway	0.0121098	0.0291363	STAT3	1
hsa-miR-874-3p	WP3871	Valproic acid pathway	0.0121098	0.0291363	HDAC1	1
hsa-miR-874-3p	WP3892	Development of pulmonary dendritic cells and macrophage subsets	0.0121098	0.0291363	STAT3	1
hsa-miR-874-3p	WP3935	Leptin Insulin Overlap	0.0158112	0.0332867	STAT3	1
hsa-miR-874-3p	WP4337	ncRNAs involved in STAT3 signaling in hepatocellular carcinoma	0.0158112	0.0332867	STAT3	1
hsa-miR-874-3p	WP3888	VEGFA-VEGFR2 Signaling Pathway	0.0186489	0.0367041	HDAC1/STAT3	2
hsa-miR-874-3p	WP1528	Physiological and Pathological Hypertrophy of the Heart	0.0231793	0.0367041	STAT3	1
hsa-miR-874-3p	WP205	IL-7 Signaling Pathway	0.0231793	0.0367041	STAT3	1
hsa-miR-874-3p	WP581	EPO Receptor Signaling	0.0240971	0.0367041	STAT3	1
hsa-miR-874-3p	WP2249	Metastatic brain tumor	0.0259305	0.0367041	E2F3	1
hsa-miR-874-3p	WP4300	Extracellular vesicles in the crosstalk of cardiac cells	0.0259305	0.0367041	STAT3	1
hsa-miR-874-3p	WP3972	PDGFR-beta pathway	0.0268461	0.0367041	STAT3	1
hsa-miR-874-3p	WP2855	Dopaminergic Neurogenesis	0.027761	0.0367041	STAT3	1
hsa-miR-874-3p	WP2112	IL17 signaling pathway	0.0286752	0.0367041	STAT3	1
hsa-miR-874-3p	WP3996	Ethanol effects on histone modifications	0.0286752	0.0367041	HDAC1	1
hsa-miR-874-3p	WP313	Signaling of Hepatocyte Growth Factor Receptor	0.0314135	0.0367041	STAT3	1
hsa-miR-874-3p	WP3995	Prion disease pathway	0.0341453	0.0367041	STAT3	1
hsa-miR-874-3p	WP2029	Cell Differentiation - Index	0.0350545	0.0367041	STAT3	1
hsa-miR-874-3p	WP2526	PDGF Pathway	0.035963	0.0367041	STAT3	1
hsa-miR-874-3p	WP4320	The effect of progerin on the involved genes in Hutchinson-Gilford Progeria Syndrome	0.035963	0.0367041	HDAC1	1
hsa-miR-874-3p	WP127	IL-5 Signaling Pathway	0.0368707	0.0367041	STAT3	1
hsa-miR-874-3p	WP2036	TNF related weak inducer of apoptosis (TWEAK) Signaling Pathway	0.0386841	0.0367041	HDAC1	1
hsa-miR-874-3p	WP49	IL-2 Signaling Pathway	0.0386841	0.0367041	STAT3	1
hsa-miR-874-3p	WP2332	Interleukin-11 Signaling Pathway	0.0404946	0.0367041	STAT3	1
hsa-miR-874-3p	WP2203	Thymic Stromal LymphoPoietin (TSLP) Signaling Pathway	0.0432051	0.0367041	STAT3	1
hsa-miR-874-3p	WP268	Notch Signaling Pathway	0.0432051	0.0367041	HDAC1	1
hsa-miR-874-3p	WP1541	Energy Metabolism	0.0441072	0.0367041	HDAC1	1
hsa-miR-874-3p	WP2038	Regulation of Microtubule Cytoskeleton	0.0450085	0.0367041	STAT3	1
hsa-miR-874-3p	WP286	IL-3 Signaling Pathway	0.0450085	0.0367041	STAT3	1
hsa-miR-874-3p	WP2023	Cell Differentiation - Index expanded	0.0459092	0.0367041	STAT3	1
hsa-miR-874-3p	WP3646	Hepatitis C and Hepatocellular Carcinoma	0.0459092	0.0367041	STAT3	1
hsa-miR-874-3p	WP2864	Apoptosis-related network due to altered Notch3 in ovarian cancer	0.0495047	0.0367041	HDAC1	1
hsa-miR-874-3p	WP395	IL-4 Signaling Pathway	0.0504018	0.0367041	STAT3	1
hsa-miR-874-3p	WP585	Interferon type I signaling pathways	0.0504018	0.0367041	STAT3	1
hsa-miR-874-3p	WP2795	Cardiac Hypertrophic Response	0.0521939	0.0367041	CDK9	1
hsa-miR-874-3p	WP560	TGF-beta Receptor Signaling	0.0530889	0.0367041	STAT3	1
hsa-miR-874-3p	WP4205	MET in type 1 papillary renal cell carcinoma	0.0539832	0.0367041	STAT3	1
hsa-miR-874-3p	WP304	Kit receptor signaling pathway	0.0548768	0.0367041	STAT3	1
hsa-miR-874-3p	WP3527	Preimplantation Embryo	0.0548768	0.0367041	AQP3	1
hsa-miR-874-3p	WP3865	RIG-I-like Receptor Signaling	0.0557697	0.0367041	PIN1	1
hsa-miR-874-3p	WP3584	MECP2 and Associated Rett Syndrome	0.0566619	0.0367041	HDAC1	1
hsa-miR-874-3p	WP45	G1 to S cell cycle control	0.0584442	0.0368834	E2F3	1
hsa-miR-874-3p	WP2324	AGE/RAGE pathway	0.0602236	0.0368834	STAT3	1
hsa-miR-874-3p	WP2374	Oncostatin M Signaling Pathway	0.0602236	0.0368834	STAT3	1
hsa-miR-874-3p	WP2032	Human Thyroid Stimulating Hormone (TSH) signaling pathway	0.0620003	0.0371635	STAT3	1
hsa-miR-874-3p	WP3303	RAC1/PAK1/p38/MMP2 Pathway	0.0628876	0.0371635	STAT3	1
hsa-miR-874-3p	WP2034	Leptin signaling pathway	0.0690789	0.0394385	STAT3	1
hsa-miR-874-3p	WP2037	Prolactin Signaling Pathway	0.0690789	0.0394385	STAT3	1
hsa-miR-874-3p	WP4298	Viral Acute Myocarditis	0.0769892	0.043222	STAT3	1
hsa-miR-874-3p	WP4018	Pathways in clear cell renal cell carcinoma	0.0787394	0.0434799	STAT3	1
hsa-miR-874-3p	WP23	B Cell Receptor Signaling Pathway	0.0883161	0.0479816	E2F3	1
hsa-miR-874-3p	WP2064	Neural Crest Differentiation	0.0917779	0.0490709	HDAC1	1
hsa-miR-874-3p	WP3931	ESC Pluripotency Pathways	0.106369	0.0559835	STAT3	1
hsa-miR-874-3p	WP236	Adipogenesis	0.11655	0.0603445	STAT3	1
hsa-miR-874-3p	WP366	TGF-beta Signaling Pathway	0.118237	0.0603445	HDAC1	1
hsa-miR-874-3p	WP2380	Brain-Derived Neurotrophic Factor (BDNF) signaling pathway	0.12747	0.0640857	STAT3	1
hsa-miR-874-3p	WP1984	Integrated Breast Cancer Pathway	0.135794	0.0672664	HDAC1	1
hsa-miR-874-3p	WP4262	Breast cancer pathway	0.138278	0.0675042	E2F3	1
hsa-miR-874-3p	WP437	EGF/EGFR Signaling Pathway	0.144051	0.0677771	STAT3	1
hsa-miR-874-3p	WP706	Sudden Infant Death Syndrome (SIDS) Susceptibility Pathways	0.144051	0.0677771	HDAC1	1
hsa-miR-874-3p	WP3929	Chemokine signaling pathway	0.144874	0.0677771	STAT3	1
hsa-miR-874-3p	WP3594	Circadian rythm related genes	0.178813	0.0825092	HDAC1	1
hsa-miR-874-3p	WP4352	Ciliary landscape	0.189087	0.0860711	HDAC1	1
hsa-miR-874-3p	WP2882	Nuclear Receptors Meta-Pathway	0.265325	0.119163	STAT3	1
